# Supplementary material for: Assessing and managing wounds of Buruli ulcer patients at the primary and secondary health care levels in Ghana
Source: PubMed Central journal article supplement (PMC5345880; doi:10.1371/journal.pntd.0005331), 2017-02-28

# Case Report OBOM

## Acute Buruli Ulcer Wounds

Patient No. 001

### 1. Demographic data

Sex: Male  
Age: 44 years

### 2. Wound description

BU Category I (see Photo documentation)

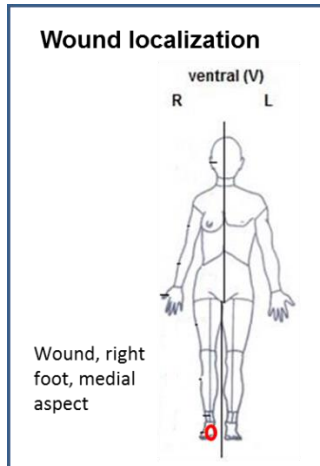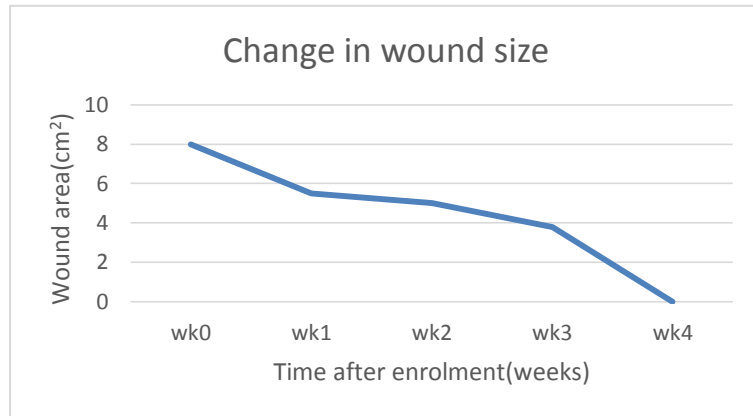

### 3. Medical History

Nil of significance

#### Wound History:

Wound observed since: 08/2013

BU- Treatment: 25/09/13- 20/11/13

Wound healed: 15/11/13

### 4. Physical examination

Body- Mass- index (BMI) 21.41 kg KG/m<sup>2</sup>

All systems normal

### 5. Current Medication

Streptomycin 1000mg, Rifampicin 600mg. 56 doses taken

Patient had been on BU treatment for 14 days before enrolment

Paracetamol (occasionally)

## 6. Laboratory

BU confirmation: ZN (-) PCR (+) for *M.ulcerans*

Retroscreen: non reactive

## 7. Photo documentation

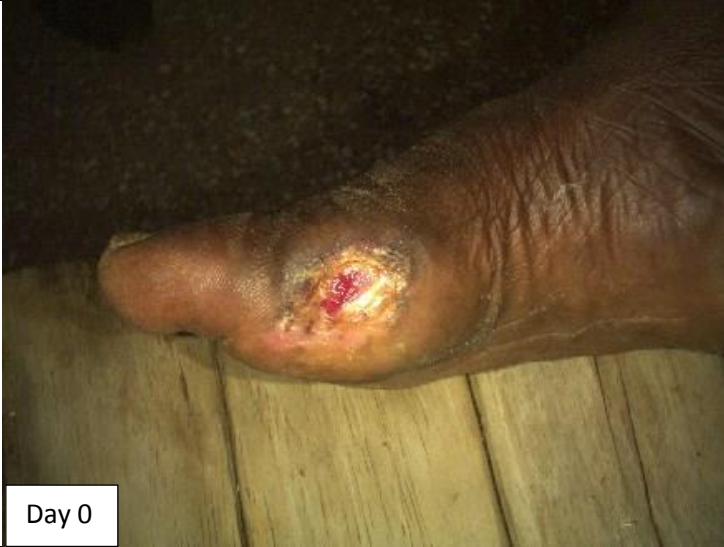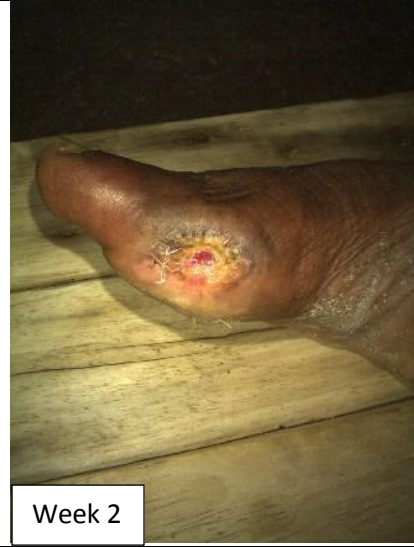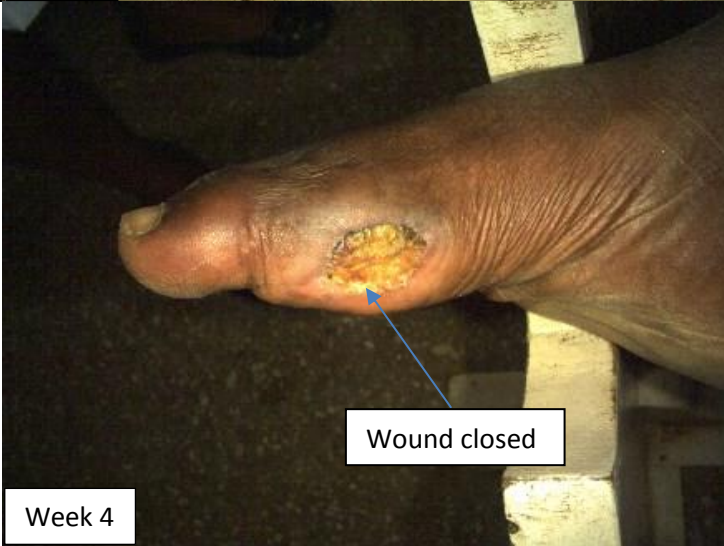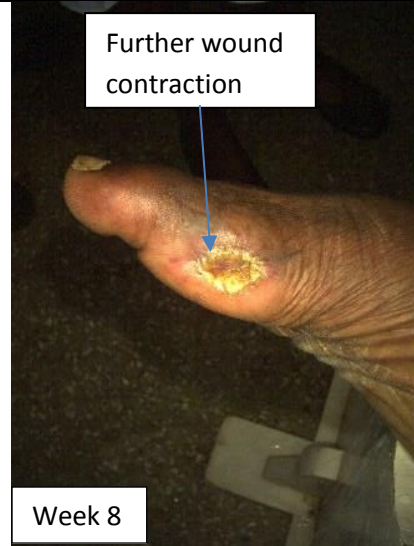

# Case Report OBOM

## Acute Buruli Ulcer Wounds

Patient No. 002

### 1. Demographic data

Sex: Male  
Age: 29 years

### 2. Wound description

BU Category I (see Photo documentation)

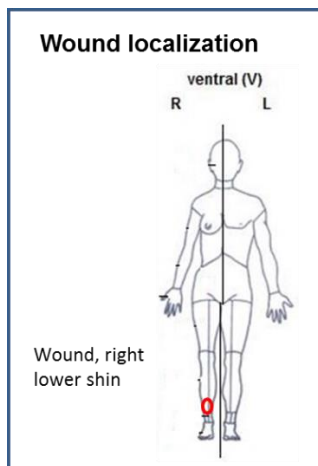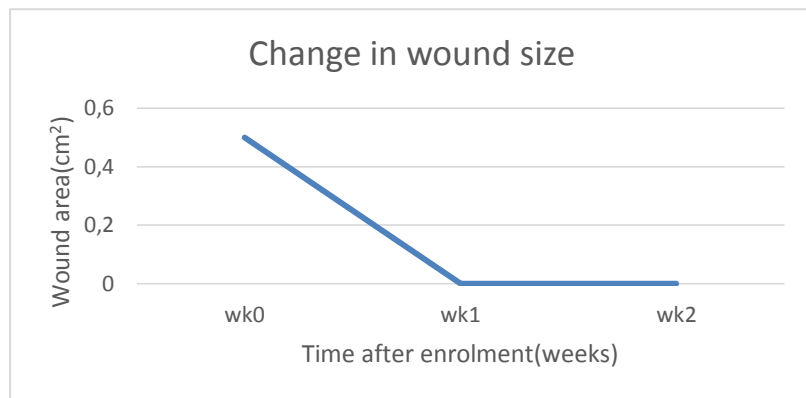

### 3. Medical History

Nil of significance

#### Wound History:

Wound observed since: 08/2013

BU- Treatment: 21/08/13- 15/10/13

Wound healed: 15/10/13

### 4. Physical examination

Body- Mass- index (BMI) 21.03 kg KG/m<sup>2</sup>

All systems normal

### 5. Current Medication

Streptomycin 1000mg, Rifampicin 600mg. 56 doses taken

Patient had been on BU treatment for 49 days before enrolment

## 6. Laboratory

BU confirmation: PCR (+) ZN (-) for *M. ulcerans*

Retroscreen: Non reactive

## 7. Photo documentation

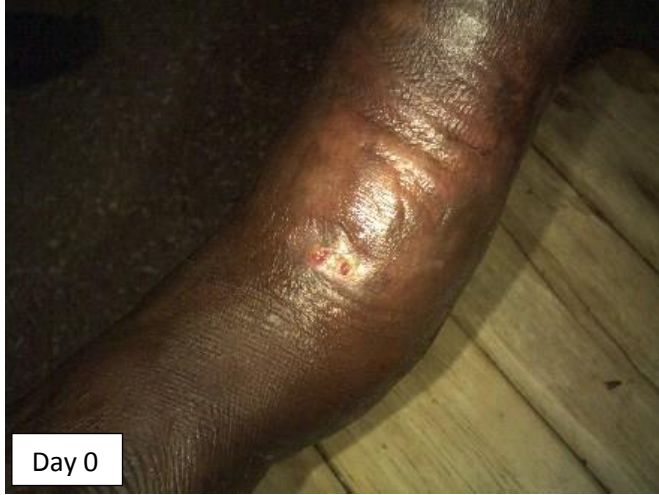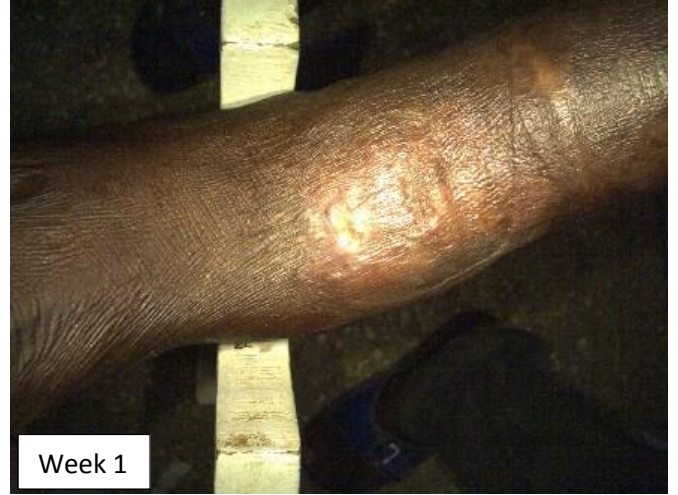

# Case Report OBOM

## Acute Buruli Ulcer Wounds

Patient No. 003

### 1. Demographic data

Sex: Male  
Age: 9 years

### 2. Wound description

BU Category I (see Photo documentation)

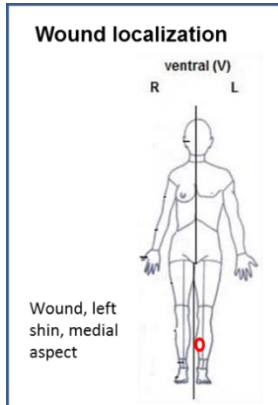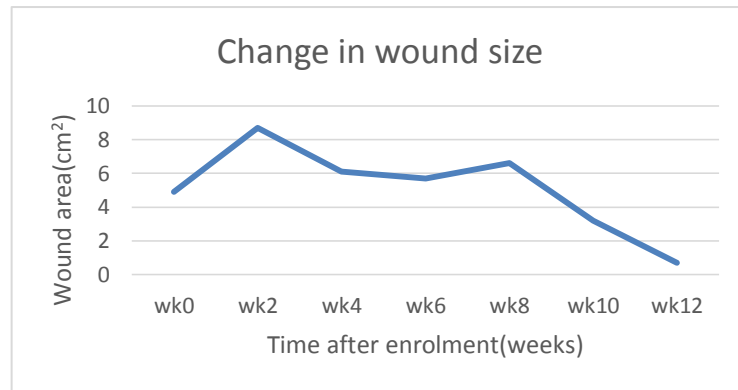

### 3. Medical History

Nil of significance

#### Wound History:

Wound observed since: 08/2013

BU- Treatment: 26/09/13- 28/11/13

Wound healed: 12/04/14

### 4. Physical examination

Body- Mass- index (BMI) 19.7 kg KG/m<sup>2</sup>

All systems normal

### 5. Current Medication

Streptomycin 750mg, Rifampicin 450mg. 56 doses taken

Patient had been on BU treatment for 20 days before enrolment

## 6. Laboratory

BU confirmation: PCR (+) ZN (+) for *M. ulcerans*

Retroscreen: Non reactive

## 7. Photo documentation

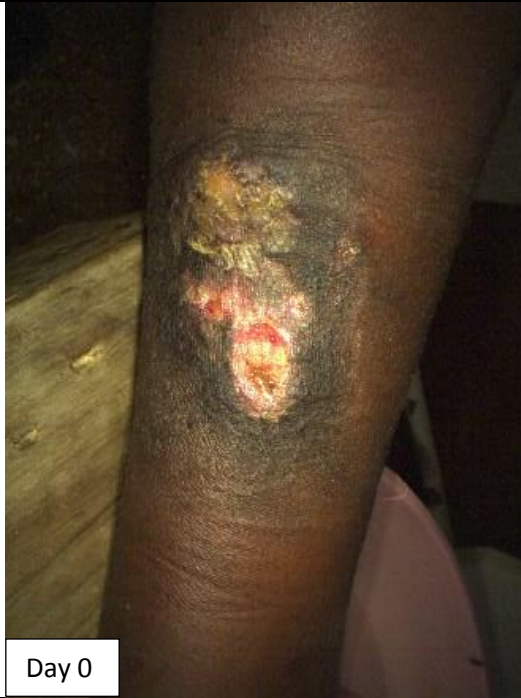

Day 0

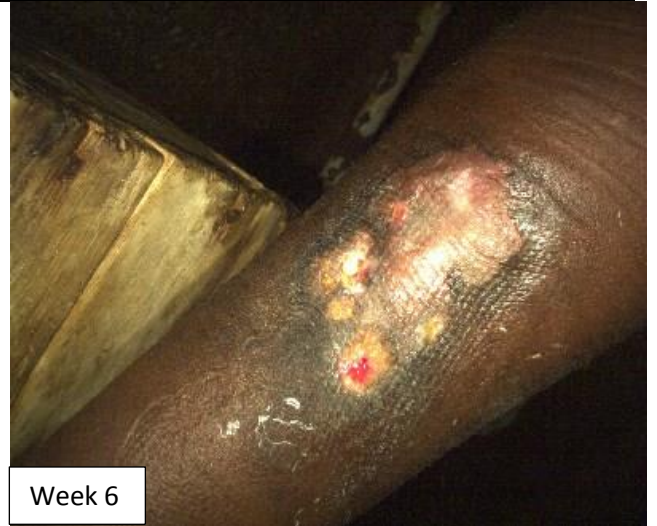

Week 6

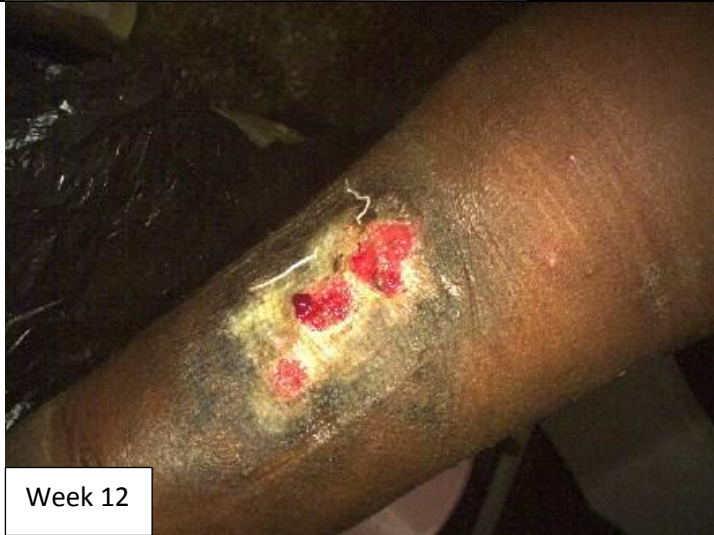

Week 12

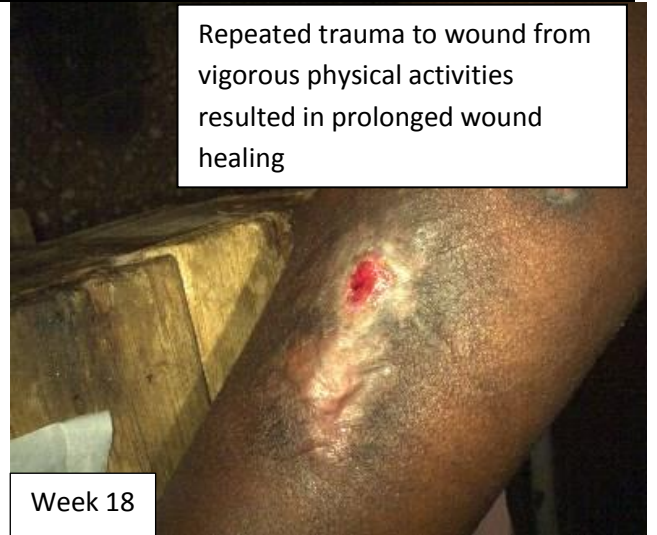

Week 18

Repeated trauma to wound from vigorous physical activities resulted in prolonged wound healing

# Case Report OBOM

## Acute Buruli Ulcer Wounds

Patient No. 004

### 1. Demographic data

Sex: Female  
Age: 4 years

### 2. Wound description

BU Category I (see Photo documentation)

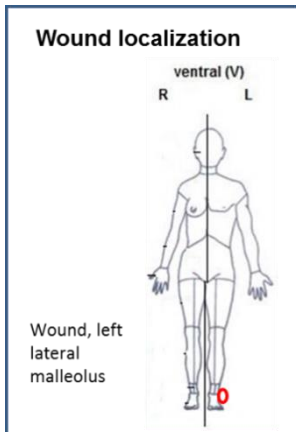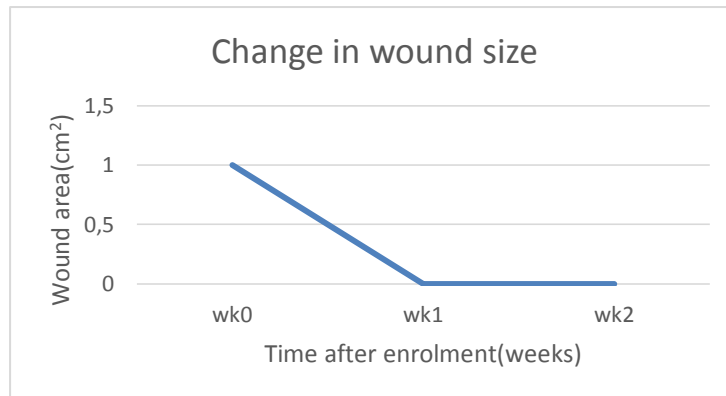

### 3. Medical History

Nil of significance

#### Wound History:

Wound observed since: 04/2013

BU- Treatment: 08/10/13- 05/12/13

Wound healed: 30/10/13

### 4. Physical examination

Body- Mass- index (BMI) 15.0 kg KG/m<sup>2</sup>

All systems normal

### 5. Current Medication

Streptomycin 330mg, Rifampicin 150mg. 56 doses taken

Patient had been on BU treatment for 8 days before enrolment

## 6. Laboratory

BU confirmation: PCR (+) ZN (-) for *M. ulcerans*

Retroscreen: Non reactive

## 7. Photo documentation

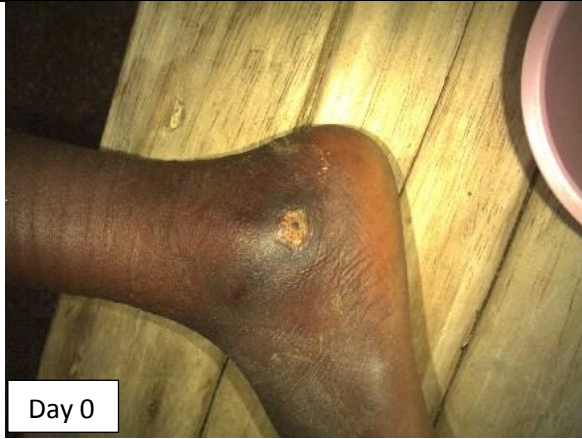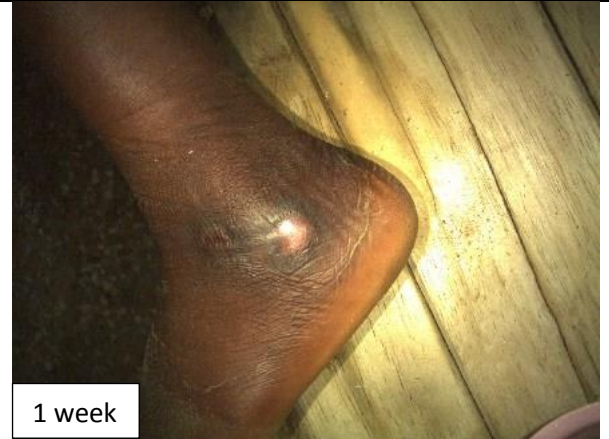



# Case Report OBOM

## Acute Buruli Ulcer Wounds

Patient No. 008

### 1. Demographic data

Sex: Male  
Age: 40 years

### 2. Wound description

BU Category III (see Photo documentation)

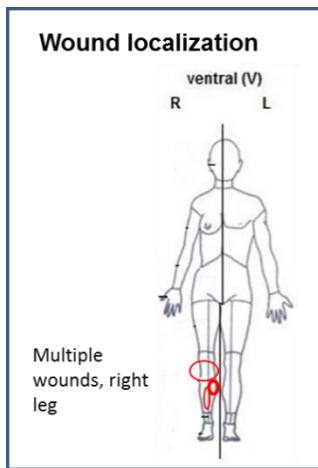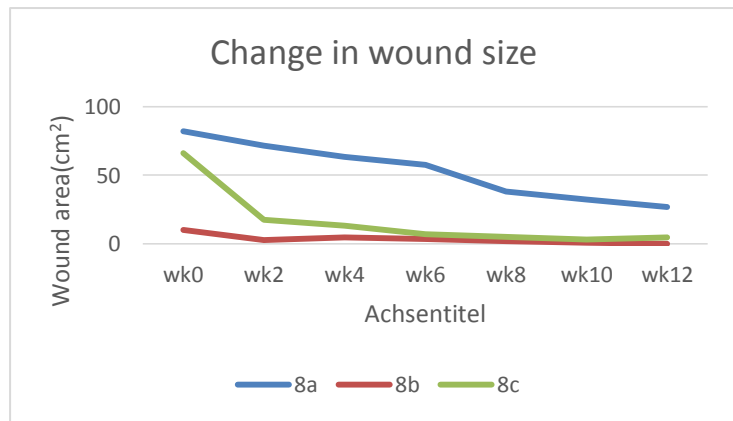

### 3. Medical History

Nil of significance

#### Wound History:

Wound observed since: 09/2013

BU- Treatment: 30/10/13- 26/12/13

Last wound healed: 04/2014

### 4. Physical examination

Body- Mass- index (BMI) 18.73 kg KG/m<sup>2</sup>

All systems normal

### 5. Current Medication

Streptomycin 1000mg, Rifampicin 600mg. 56 doses taken

## 6. Laboratory

BU confirmation: PCR (+) ZN (-) for *M. ulcerans*

Retroscreen: Non reactive

## 7. Photo documentation

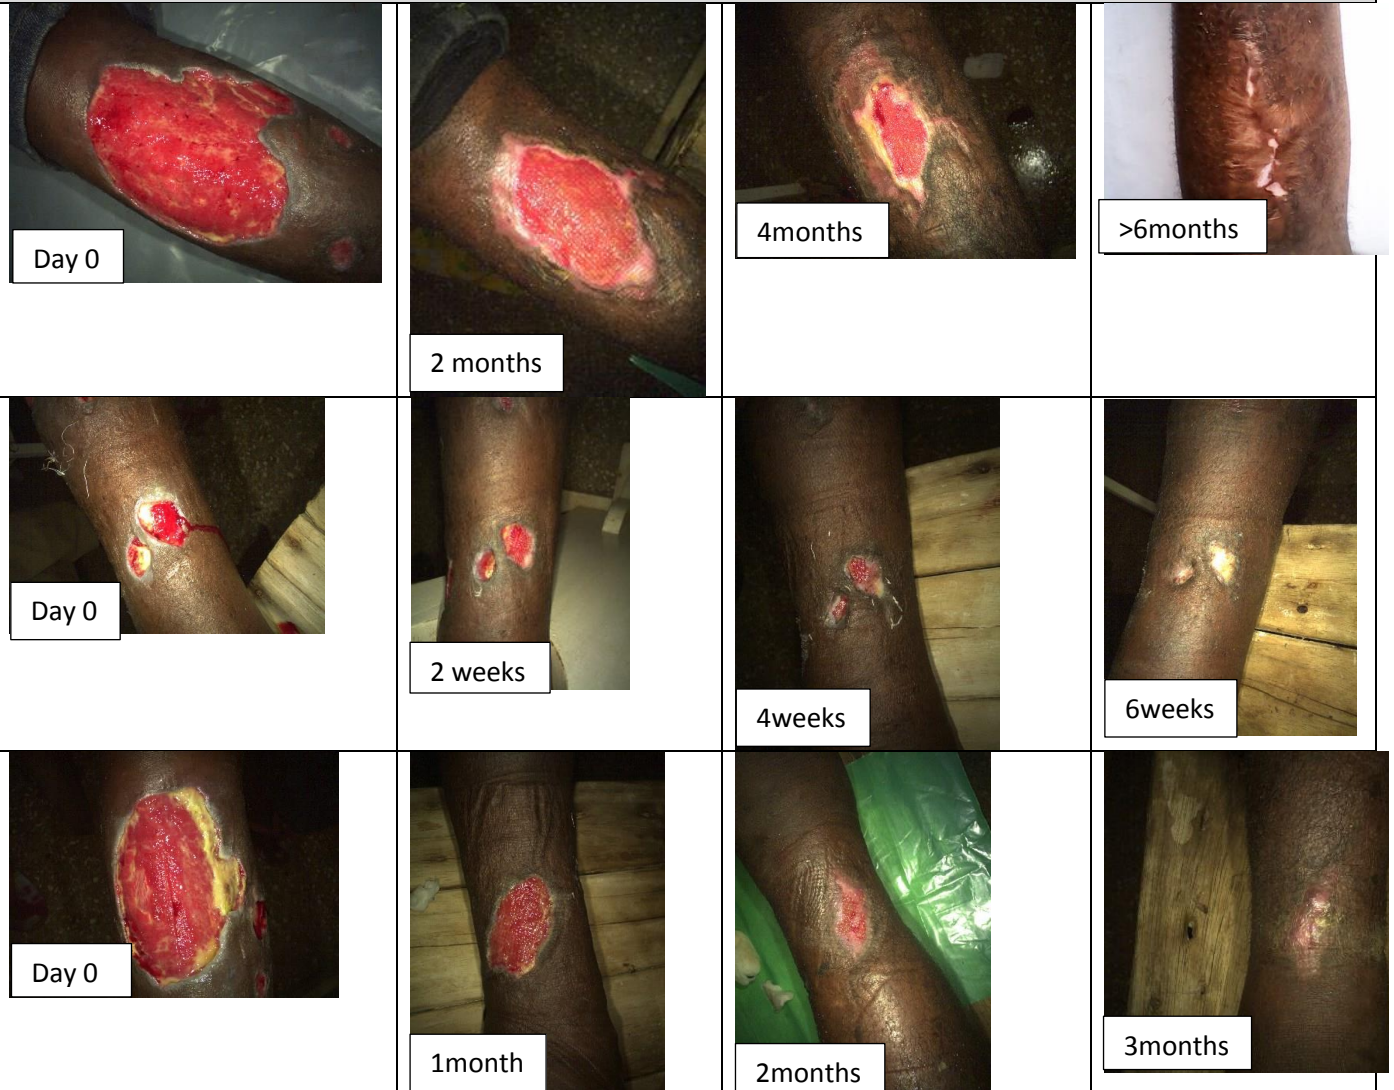

# Case Report OBOM

## Acute Buruli Ulcer Wounds

Patient No. 010

### 1. Demographic data

Sex: Male  
Age: 10 years

### 2. Wound description

BU Category III (see Photo documentation)

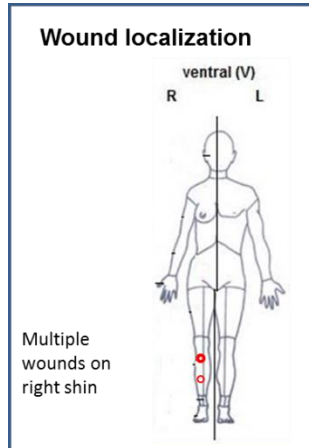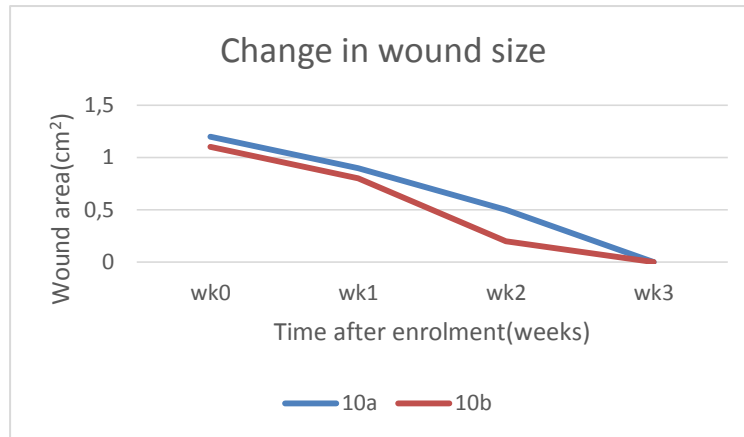

### 3. Medical History

Nil of significance

#### Wound History:

Wound observed since: 05/2013

BU- Treatment: 13/11/13- 20/01/14

Wound healed: 11/12/13

### 4. Physical examination

Body- Mass- index (BMI) 17.86 kg KG/m<sup>2</sup>

All systems normal

### 5. Current Medication

Streptomycin 750mg, Rifampicin 450mg 56 doses taken

## 6. Laboratory

BU confirmation: PCR (+) ZN (-) for *M. ulcerans*

Retroscreen: Non reactive

## 7. Photo documentation Wound 10a

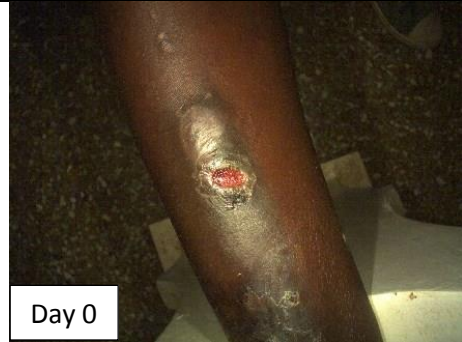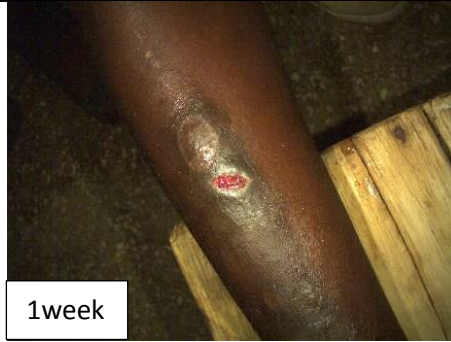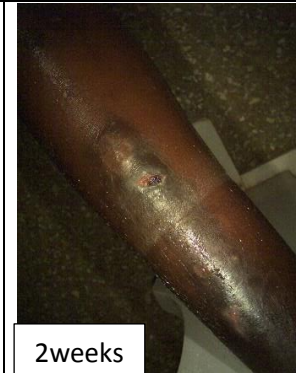

## Photo documentation: Wound 10b

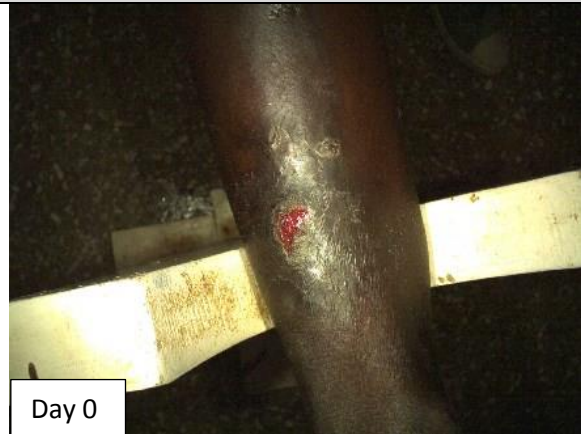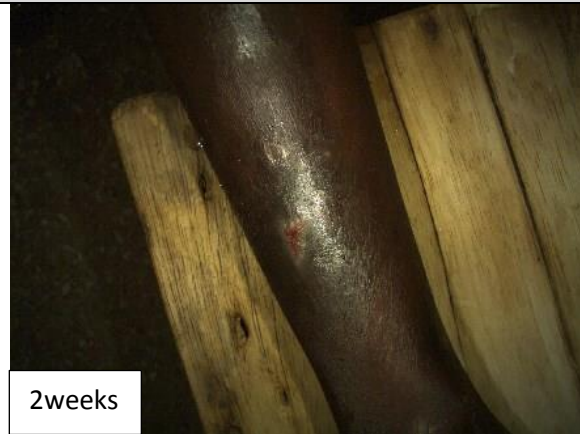

# Case Report OBOM

## Acute Buruli Ulcer Wounds

Patient No. 021

### 1. Demographic data

Sex: Male  
Age: 23 years

### 2. Wound description

BU Category III (see Photo documentation)

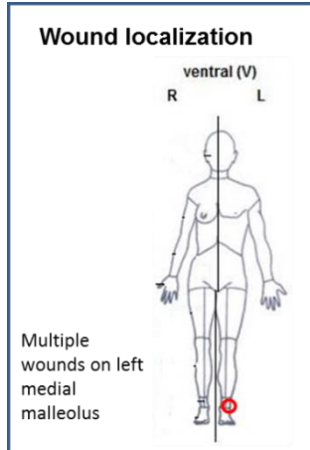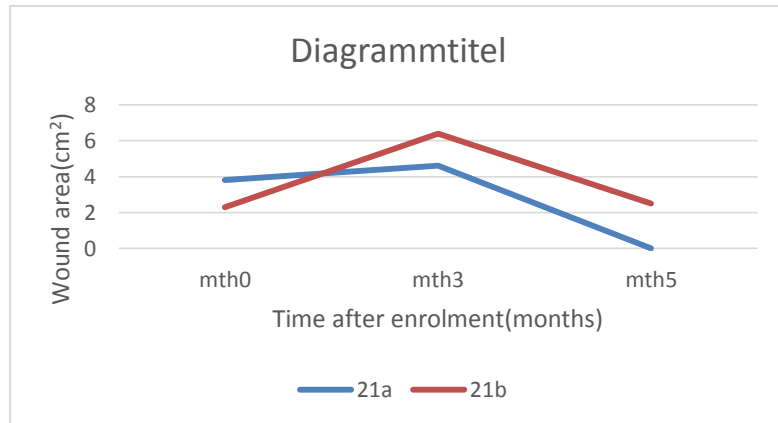

### 3. Medical History

Sickle Cell Disease

#### Wound History:

Wound observed since: 12/2013

BU- Treatment: 21/05/14- 29/07/14

Wound healed: 11/2014

### 4. Physical examination

Body- Mass- index (BMI) 20.69 kg KG/m<sup>2</sup>

All systems normal

### 5. Current Medication

Streptomycin 1000mg, Rifampicin 600mg. 56 doses taken  
Haematinics

## 6. Laboratory

BU confirmation: PCR (+) ZN (-) for *M. ulcerans*

Retroscreen: Non reactive

Hb electrophoresis: SS genotype

## 7. Photo documentation:

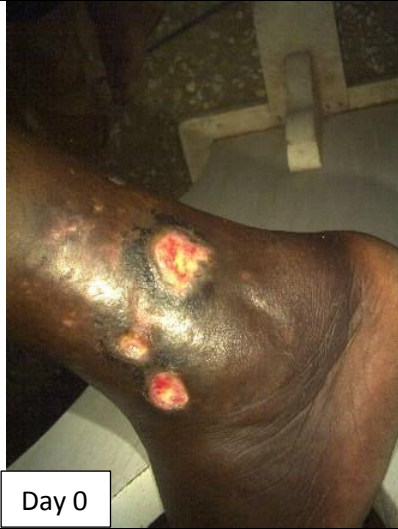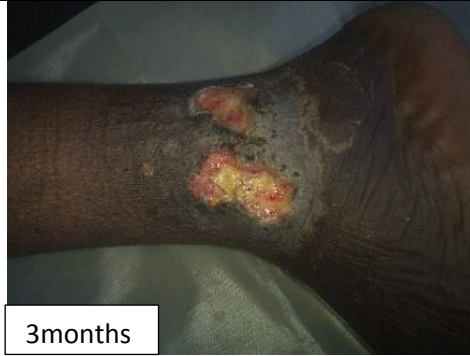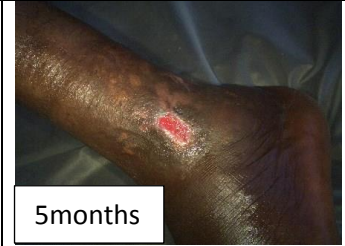

# Case Report OBOM

## Acute Buruli Ulcer Wounds

Patient No. 022

### 1. Demographic data

Sex: Male  
Age: 57 years

### 2. Wound description

BU Category III (see Photo documentation)

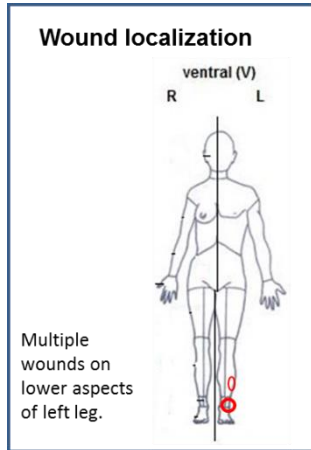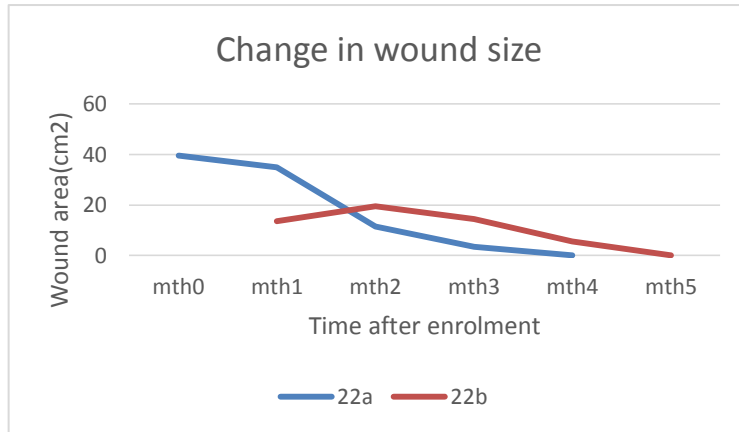

### 3. Medical History

Hypertensive

#### Wound History:

Wound observed since: 03/2014

BU- Treatment: 04/06/14- 03/08/14

All wounds healed by: 12/11/2014

### 4. Physical examination

Body- Mass- index (BMI) 24.93 kg KG/m<sup>2</sup>

All systems normal

### 5. Current Medication

Streptomycin 1000mg, Rifampicin 600mg. 56 doses taken

## 6. Laboratory

BU confirmation: PCR (+) ZN (-) for *M. ulcerans*

Retroscreen: Non reactive

## 7. Photo documentation: Wound 22a

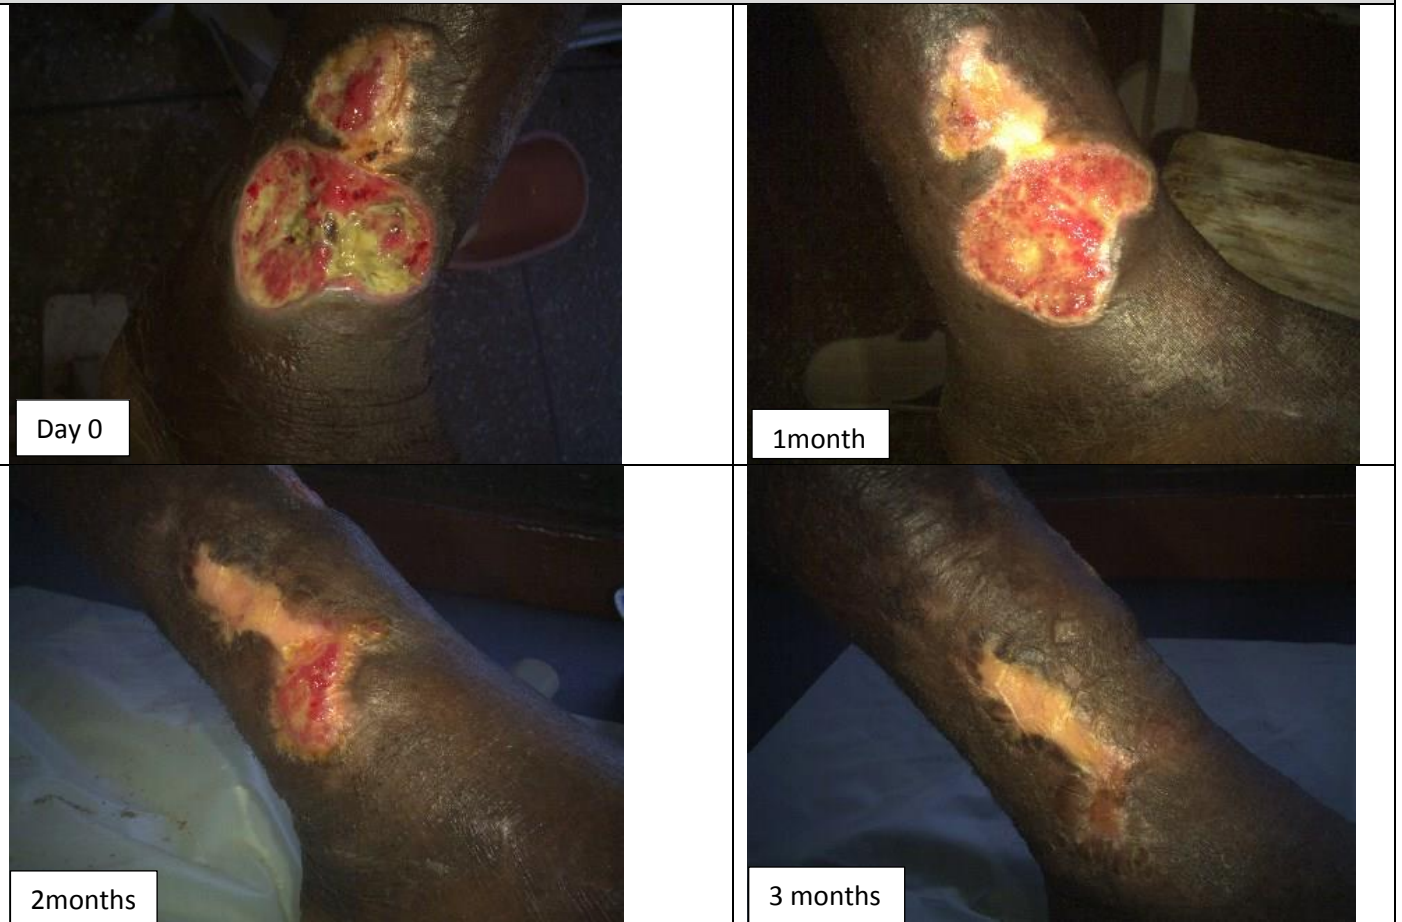

## Wound 22b

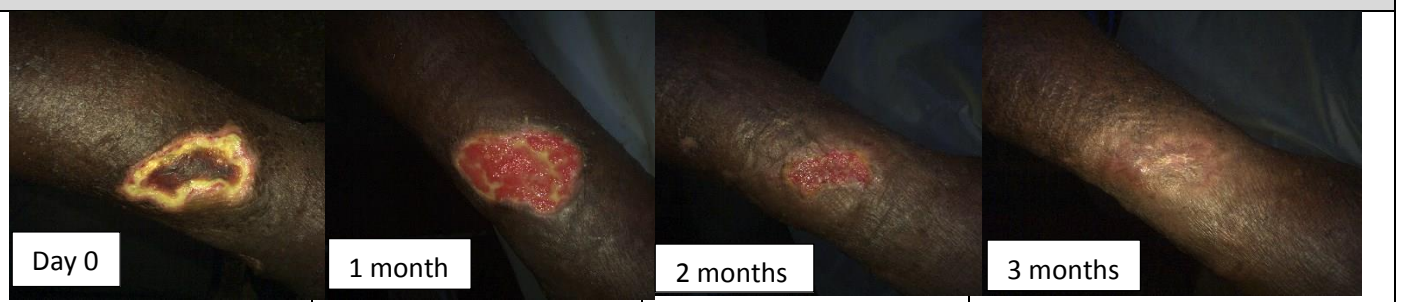



# Case Report OBOM

## Acute Buruli Ulcer Wounds

Patient No. 023

### 1. Demographic data

Sex: Male  
Age: 2.5 years

### 2. Wound description

BU Category I (see Photo documentation)

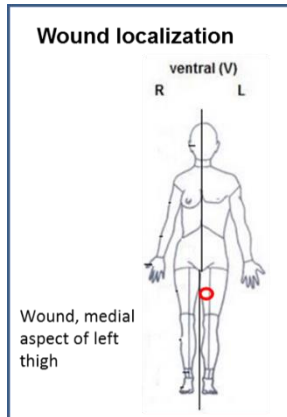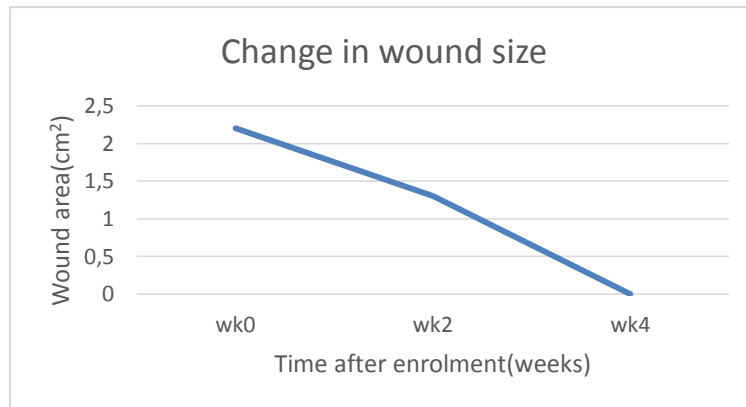

### 3. Medical History

Nil of significance

#### Wound History:

Wound observed since: 04/2014

BU- Treatment: 02/07/14- 05/09/14

Wound healed by: 04/08/2014

### 4. Physical examination

Body- Mass- index (BMI) 15.95 kg KG/m<sup>2</sup>

All systems normal

### 5. Current Medication

Streptomycin 330mg, Rifampicin 150mg. 56 doses taken

## 6. Laboratory

BU confirmation: PCR (+) ZN (+) for *M. ulcerans*

Retroscreen: Non reactive

## 7. Photo documentation:

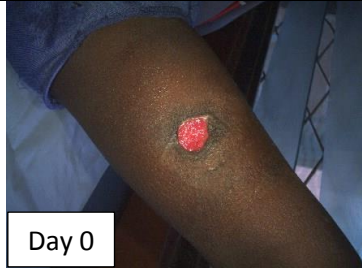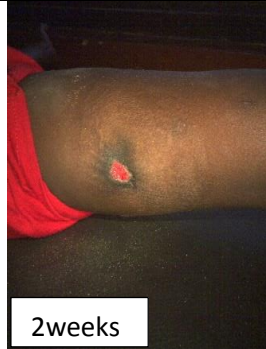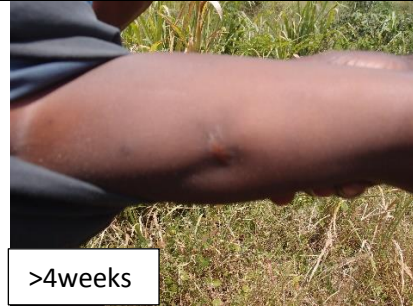

# Case Report OBOM

## Acute Buruli Ulcer Wounds

Patient No. 024

### 1. Demographic data

Sex: Female

Age: 6 years

### 2. Wound description

BU Category II (see Photo documentation)

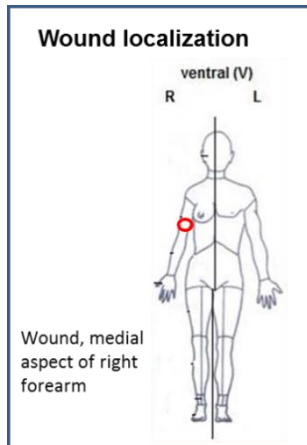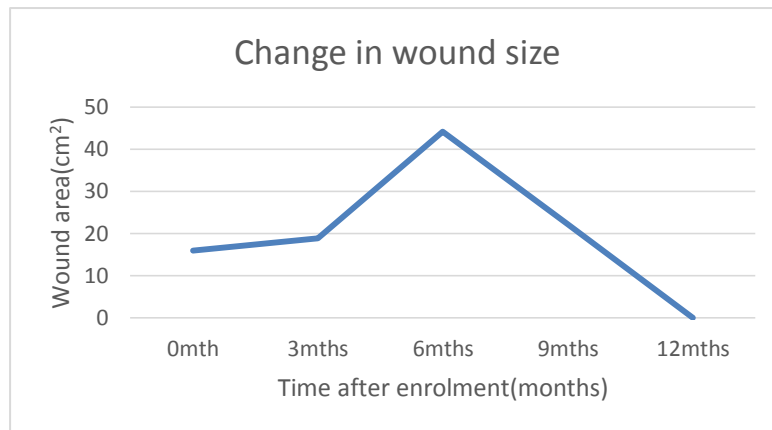

### 3. Medical History

Nil of significance

#### Wound History:

Wound observed since: 07/2014

BU- Treatment: 20/08/14- 17/10/14

Wound healed by: 11/2015

### 4. Physical examination

Body- Mass- index (BMI) 14.24 kg KG/m<sup>2</sup>

All systems normal

### 5. Current Medication

Streptomycin 330mg, Rifampicin 150mg. 56 doses taken

Patient had been on BU treatment for 7 days before enrolment

## 6. Laboratory

BU confirmation: PCR (+) ZN (-) for *M. ulcerans*

Retroscreen: Non reactive

## 7. Photo documentation:

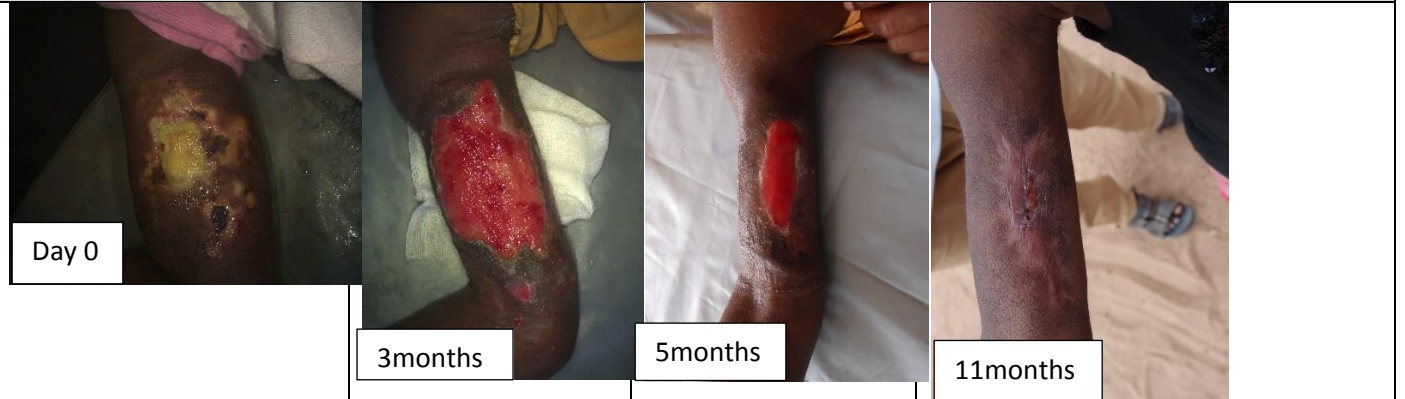

# Case Report OBOM

## Acute Buruli Ulcer Wounds

Patient No. 025

### 1. Demographic data

Sex: Female  
Age: 42 years

### 2. Wound description

BU Category I (see Photo documentation)

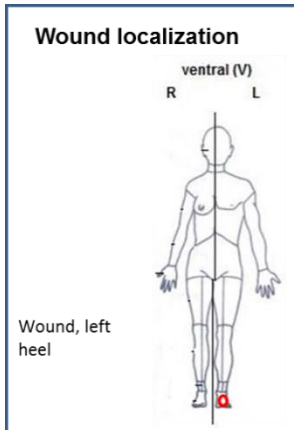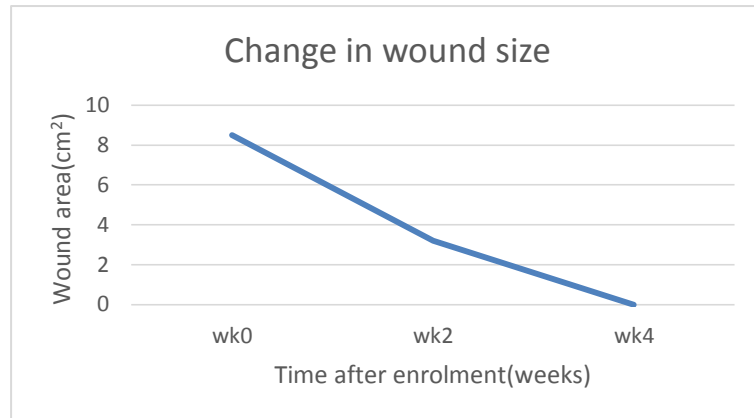

### 3. Medical History

Nil of significance

#### Wound History:

Wound observed since: 10/2014

BU- Treatment: 05/11/14- 17/12/14

Wound healed by: 10/12/14

Patient was lost to follow up after 4 weeks of treatment

### 4. Physical examination

Body- Mass- index (BMI) 22.9 kg KG/m<sup>2</sup>

All systems normal

### 5. Current Medication

Streptomycin 1000mg, Rifampicin 600mg. 26 doses taken

Patient had been on BU treatment for 7 days before enrolment.

## 6. Laboratory

BU confirmation: PCR (+) ZN (-) for *M. ulcerans*

Retroscreen: Non reactive

## 7. Photo documentation:

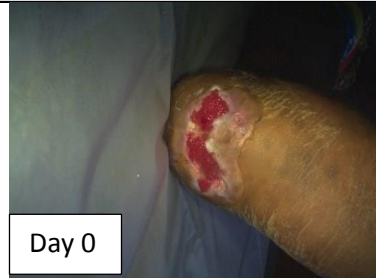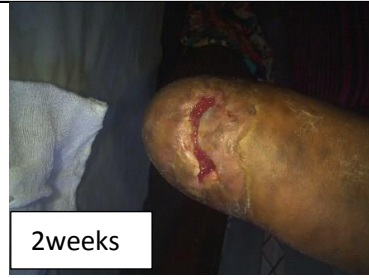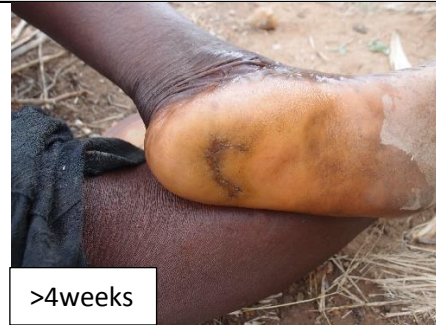

# Case Report OBOM

## Acute Buruli Ulcer Wounds

Patient No. 026

### 1. Demographic data

Sex: Male  
Age: 36 years

### 2. Wound description

BU Category III (see Photo documentation)

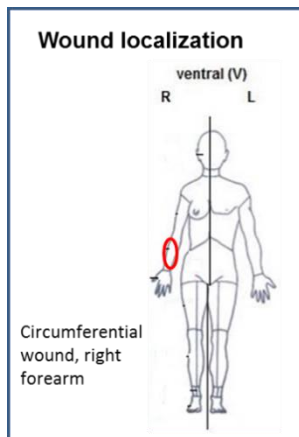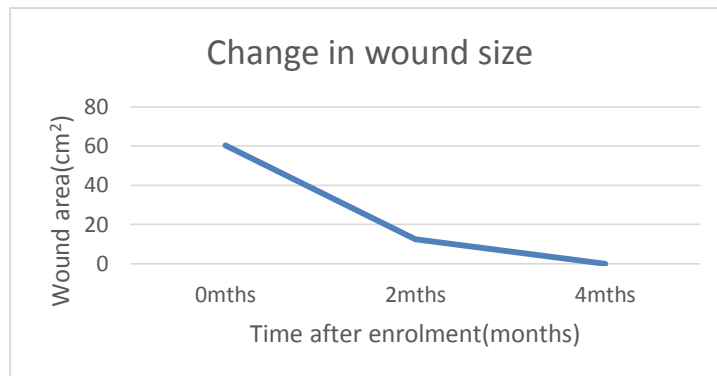

### 3. Medical History

Nil of significance

#### Wound History:

Had a previous large wound at same site treated with herbal medication 25 years before new wound  
New wound observed since: 09/2014

BU- Treatment: 05/11/14- 02/01/15

Wound healed by: 03/2015

### 4. Physical examination

Body- Mass- index (BMI) 22.5 kg KG/m<sup>2</sup>

All systems normal

### 5. Current Medication

Streptomycin 1000mg, Rifampicin 600mg. 56 doses taken

Patient had been on BU treatment for 7 days before enrolment.

Paracetamol

## 6. Laboratory

BU confirmation: PCR (+) ZN (-) for *M. ulcerans*

Retroscreen: Non reactive

## 7. Photo documentation:

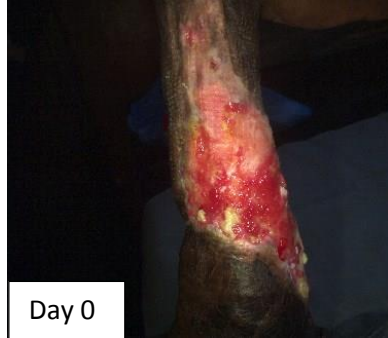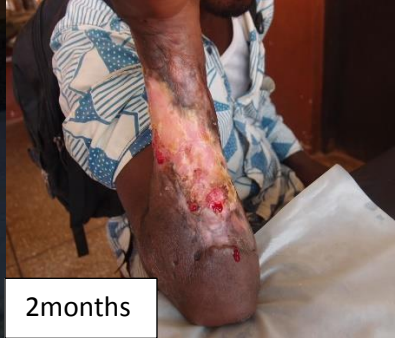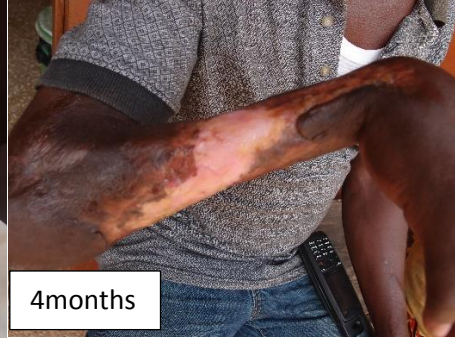



# Case Report OBOM

## Acute Buruli Ulcer Wounds

Patient No. 027

### 1. Demographic data

Sex: Female  
Age: 21 years

### 2. Wound description

BU Category II (see Photo documentation)

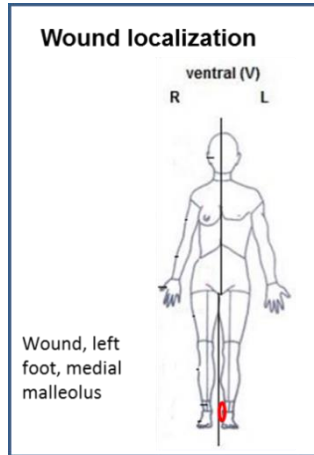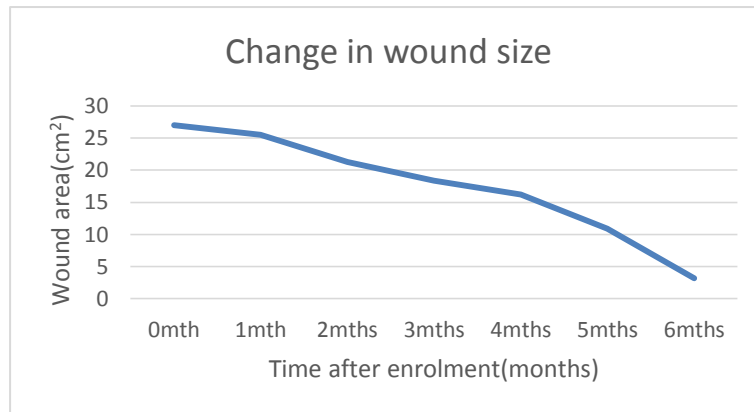

### 3. Medical History

Nil of significance

#### Wound History:

Wound observed since: 11/2013

BU- Treatment: 21/11/14- 26/01/15

Almost healed

### 4. Physical examination

Body- Mass- index (BMI) 21.5 kg KG/m<sup>2</sup>

All systems normal

### 5. Current Medication

Streptomycin 1000mg, Rifampicin 600mg. 56 doses taken

Patient had been on BU treatment for 5 days before enrolment.

Paracetamol

## 6. Laboratory

BU confirmation: PCR (+) ZN (-) for *M. ulcerans*

Retroscreen: Non reactive

## 7. Photo documentation:

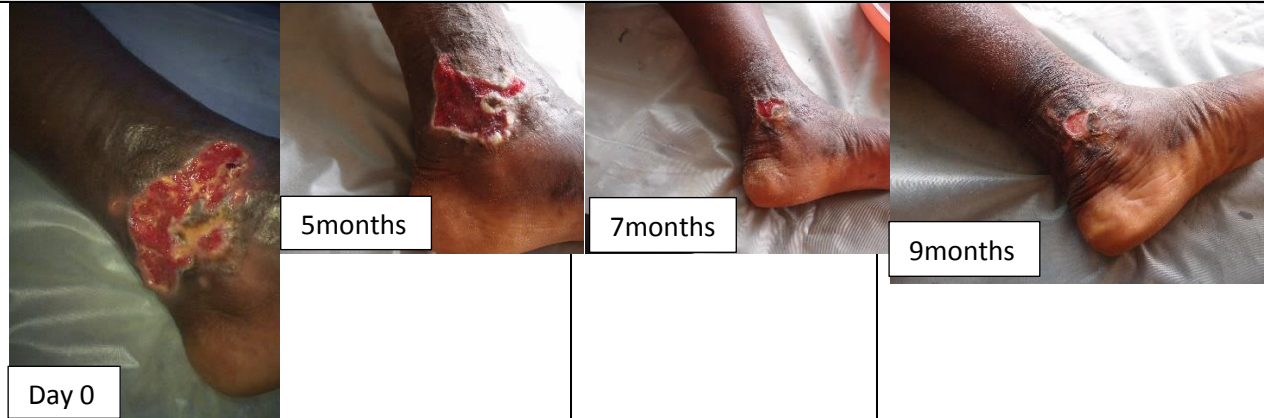

# Case Report OBOM

## Chronic Buruli Ulcer Wounds

Patient No. 006

### 1. Demographic data

Sex: Female

Age: 9 years

### 2. Wound description

BU Category II (see Photo documentation)

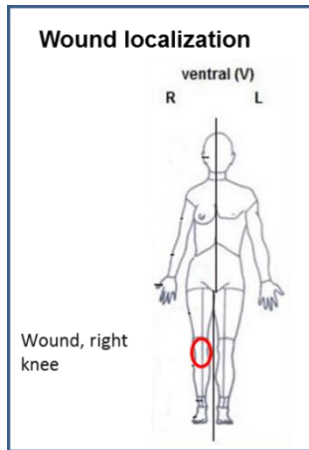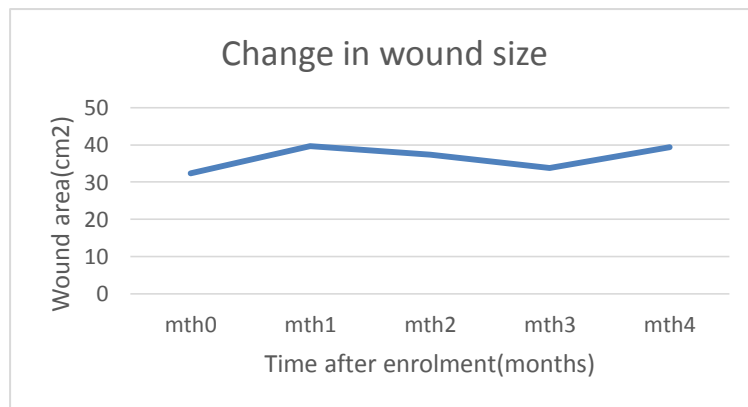

### 3. Medical History

Nil of significance

#### Wound History:

Wound observed since: 10/2011

BU- Treatment: 14/08/13- 09/10/13

Patient was lost to follow-up after 4 months of wound monitoring

### 4. Physical examination

Body- Mass- index (BMI) 14.58 kg KG/m<sup>2</sup>

All systems normal

### 5. Current Medication

Streptomycin 500mg, Rifampicin 300mg. 56 doses taken

Patient had completed BU treatment 2 weeks before enrolment..

## 6. Laboratory

BU confirmation: PCR (+) ZN (-) for *M. ulcerans*

Retroscreen: Non reactive

## 7. Photo documentation:

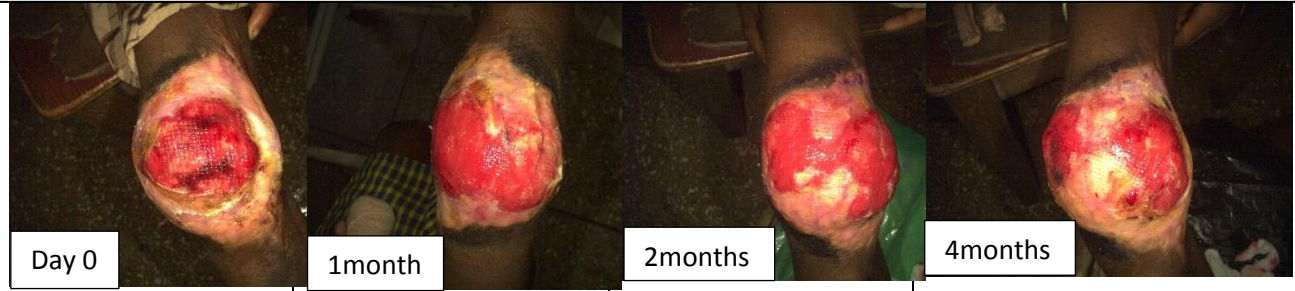

# Case Report OBOM

## Chronic Buruli Ulcer Wounds

Patient No. 013

### 1. Demographic data

Sex: Male  
Age: 45 years

### 2. Wound description

BU Category III (see Photo documentation)

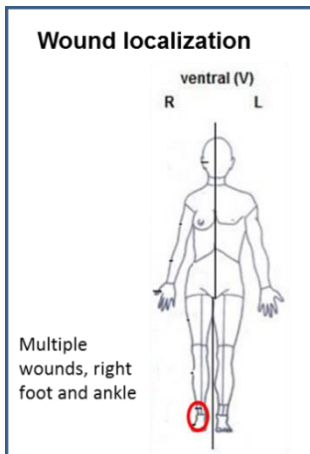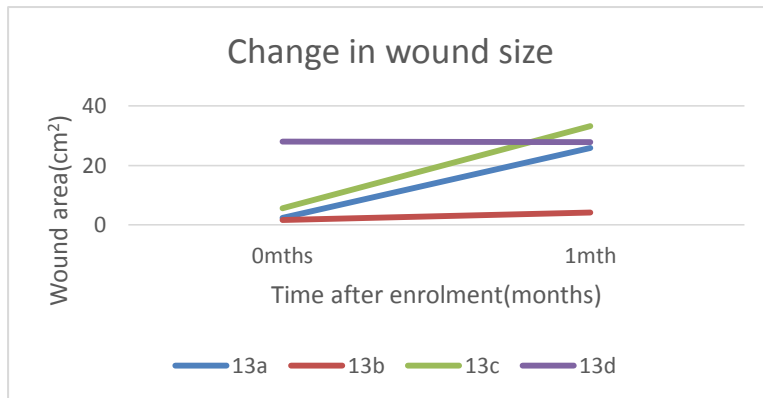

### 3. Medical History

Retroviral infection

#### Wound History:

Wound observed since: 10/2011

BU- Treatment: 28/11/13- 24/01/14

Patient was lost to follow up after 1 month of wound monitoring

### 4. Physical examination

Body- Mass- index (BMI) 19.61 kg KG/m<sup>2</sup>

All systems normal

### 5. Current Medication

Streptomycin 1000mg, Rifampicin 600mg. 56 doses taken

Patient had been on BU treatment for 20 days before enrolment.

## 6. Laboratory

BU confirmation: PCR (+) ZN (+) for *M. ulcerans*

Retroscreen: Reactive

## 7. Photo documentation: Wound 13a

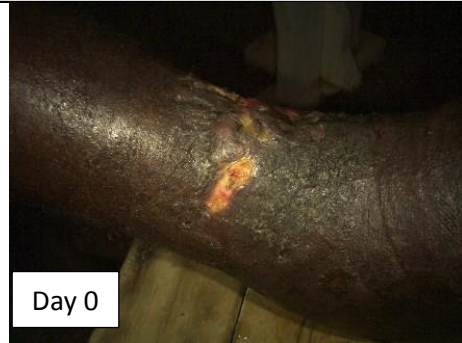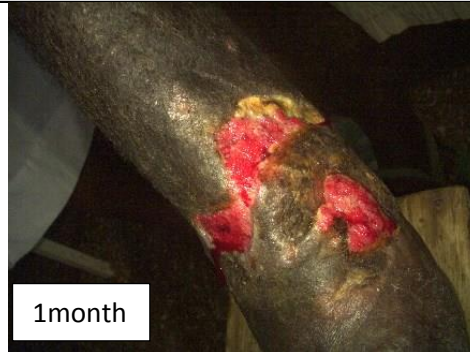

### Wound 13b

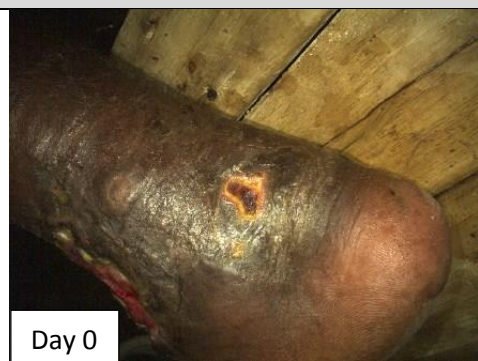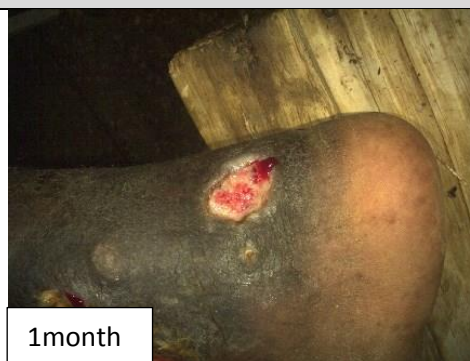

### Wound 13c

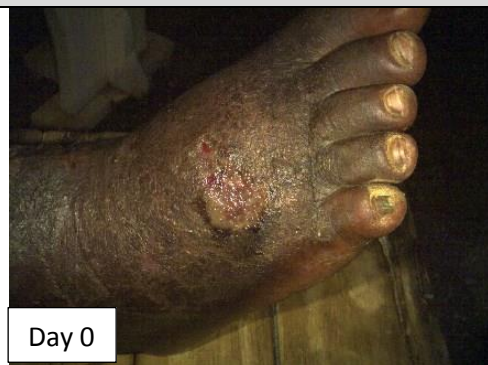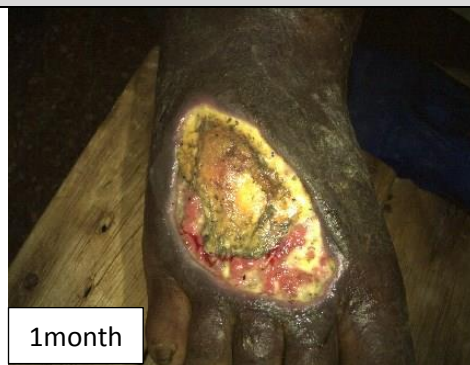

### Wound 13d

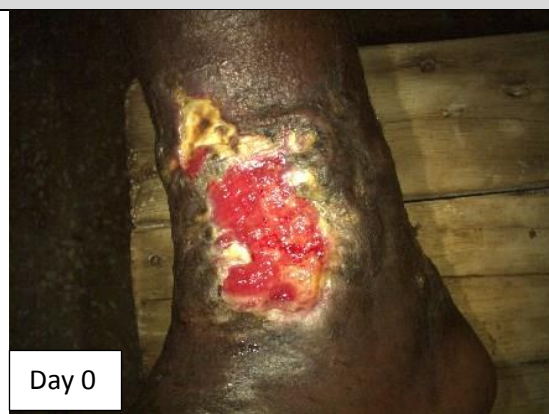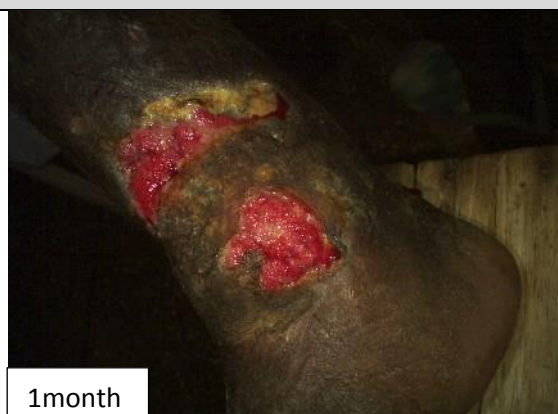

# Case Report OBOM

## Chronic Buruli Ulcer Wounds

Patient No. 007

### 1. Demographic data

Sex: Male  
Age: 49 years

### 2. Wound description

BU Category III (see Photo documentation)

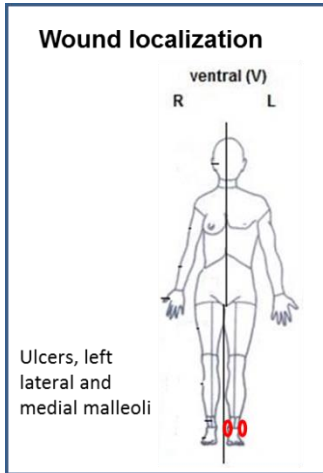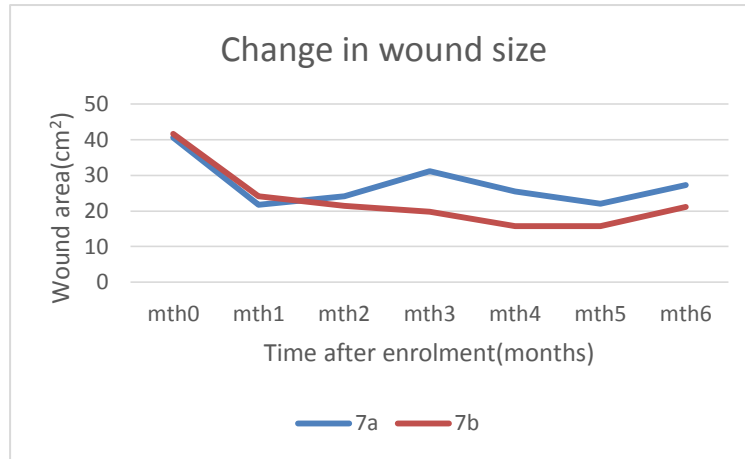

### 3. Medical History

Nil of significance

#### Wound History:

Wound observed since: 02/2013

Treatment for previous wounds at same sites:2012

Non healing

Affected limb with signs of chronic lymphoedema

### 4. Physical examination

Body- Mass- index (BMI) 19.25 kg KG/m<sup>2</sup>

All systems normal

### 5. Current Medication

Streptomycin 1000mg, Rifampicin 600mg. 56 doses taken

Patient had completed BU treatment 1 year before enrolment.

## 6. Laboratory

BU confirmation: PCR (+) ZN (-) for *M. ulcerans*

Retroscreen: Non reactive

## 7. Photo documentation: Wound 7a

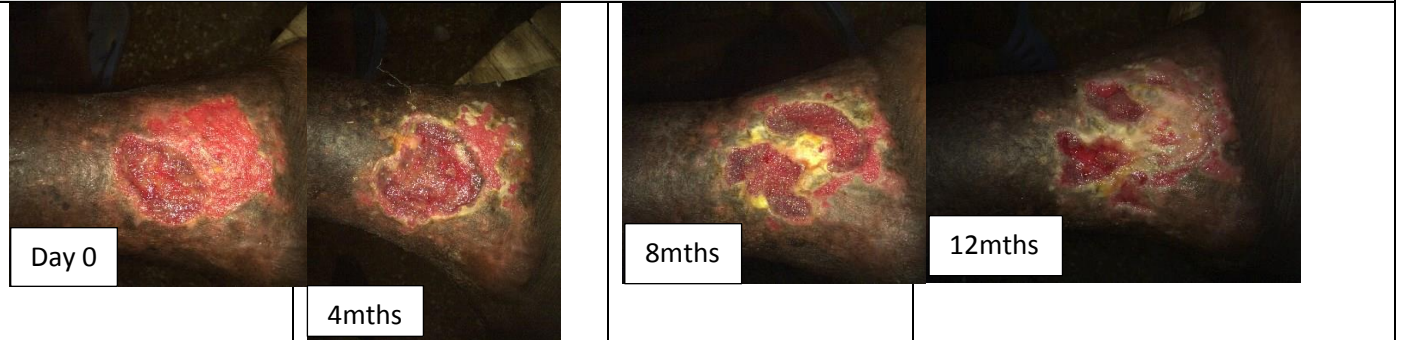

## Wound 7b

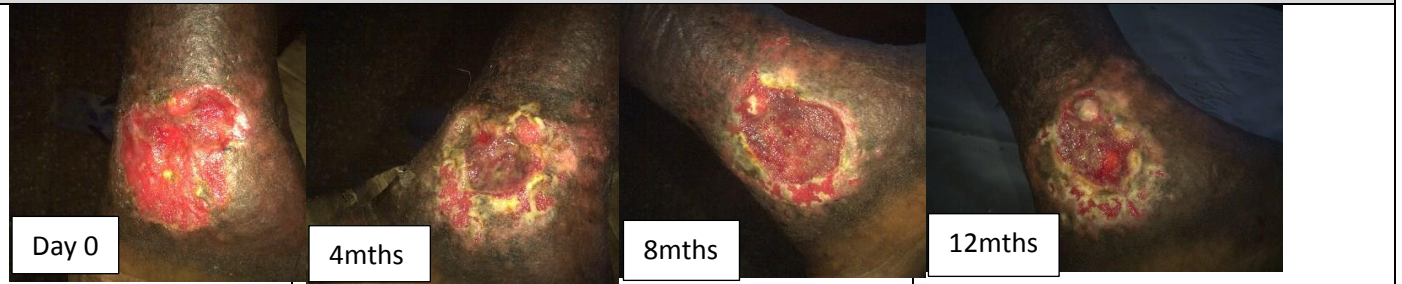



# Case Report OBOM

## Chronic Buruli Ulcer Wounds

Patient No. 009

### 1. Demographic data

Sex: Female  
Age: 36 years

### 2. Wound description

BU Category III (see Photo documentation)

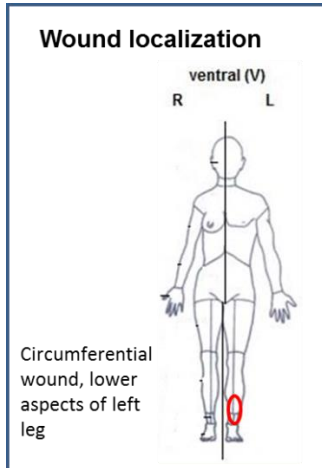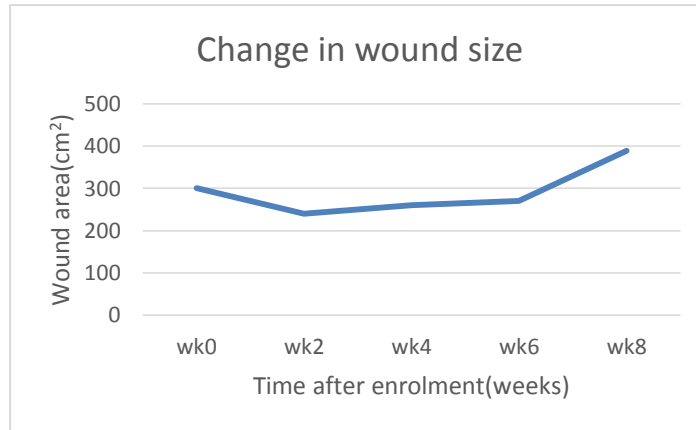

### 3. Medical History

Nil of significance

#### Wound History:

Wound observed since: 05/2010

BU- Treatment: 06/11/13- 02/01/14

Wound non healing

Tissue infection

### 4. Physical examination

Body- Mass- index (BMI) 38.97 kg KG/m<sup>2</sup>

All systems normal

### 5. Current Medication

Streptomycin 1000mg, Rifampicin 600mg. 56 doses taken

Diclofenac

Oral Cefuroxime (7days) for wound infection

## 6. Laboratory

BU confirmation: PCR (+) ZN (-) for *M. ulcerans*

Retroscreen: Non reactive

## 7. Microbiology

Wound C/S: *Providencia stuartii* cultured (6/11/13)

## 8. Photo documentation:

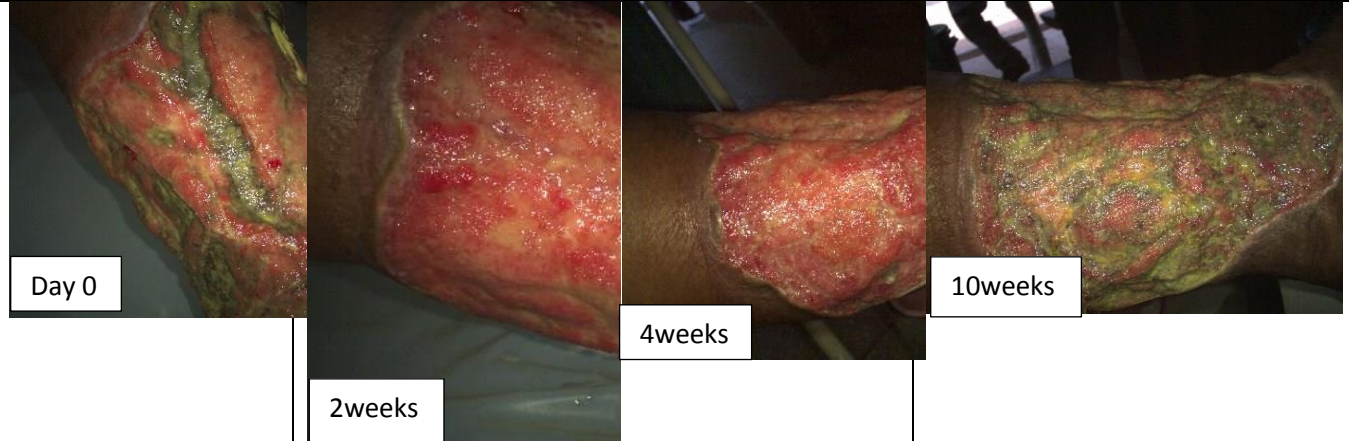

# Case Report OBOM

## Chronic Buruli Ulcer Wounds

Patient No. 012

### 1. Demographic data

Sex: Female  
Age: 32 years

### 2. Wound description

BU Category II (see Photo documentation)

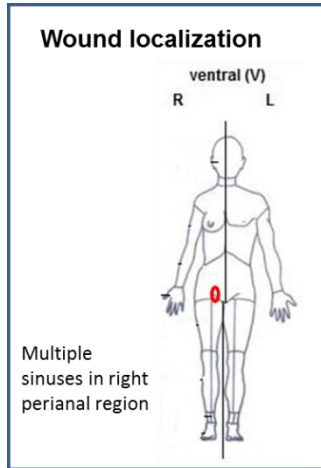

### 3. Medical History

Nil of significance

#### Wound History:

Wound observed since: 11/2010

BU- Treatment: 14/11/13- 06/12/13

Chronic osteomyelitis suspected

Patient was lost to follow-up after 2 weeks of wound monitoring.

### 4. Physical examination

Body- Mass- index (BMI) 21.78 kg KG/m<sup>2</sup>

All systems normal

### 5. Current Medication

Streptomycin 1000mg, Rifampicin 600mg. 22 doses taken

Patient had been on BU treatment for 6 days before enrolment

## 6. Laboratory

BU confirmation: PCR (+) ZN (+) for *M. ulcerans*

Retroscreen: Non reactive

## 7. Photo documentation:

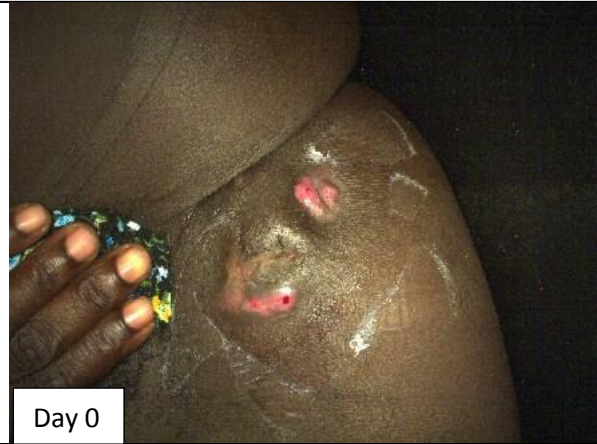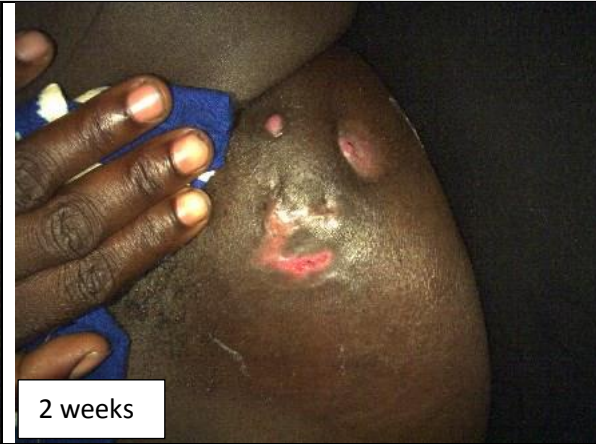

# Case Report OBOM

## Chronic Buruli Ulcer Wounds

Patient No. 014

### 1. Demographic data

Sex: Female  
Age: 60 years

### 2. Wound description

BU Category II (see Photo documentation)

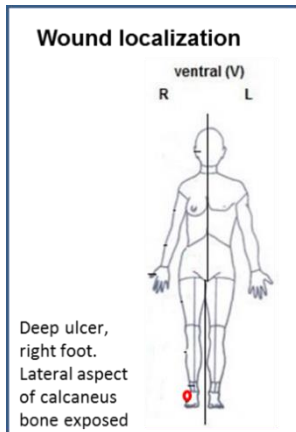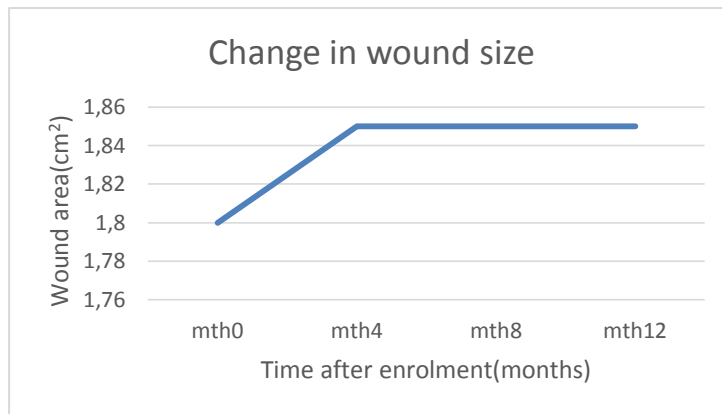

### 3. Medical History

Asthmatic

#### Wound History:

Wound observed since: 01/2011

BU- Treatment: 16/02/11- 10/04/11

Non- healing wound

### 4. Physical examination

Body- Mass- index (BMI) 18.73 kg KG/m<sup>2</sup>

All systems normal

### 5. Current Medication

Streptomycin 750mg, Rifampicin 450mg. 56 doses taken

Patient had completed BU treatment 3 years before enrolment

## 6. Laboratory

BU confirmation: PCR (+) ZN (-) for *M. ulcerans*

Retroscreen: Non reactive

## 7. Photo documentation:

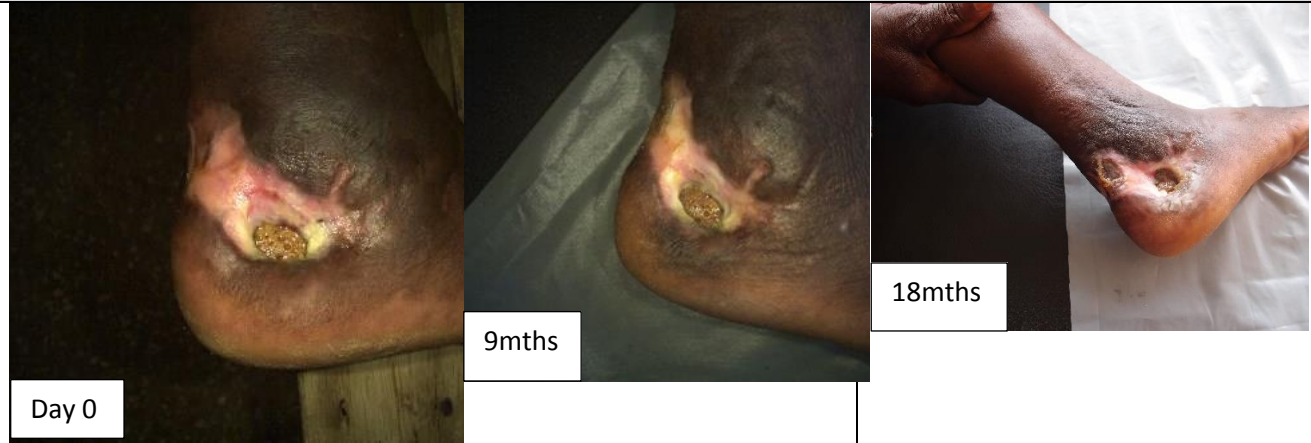

# Case Report OBOM

## Chronic Buruli Ulcer Wounds

Patient No. 011

### 1. Demographic data

Sex: Female  
Age: 15 years

### 2. Wound description

BU Category II (see Photo documentation)

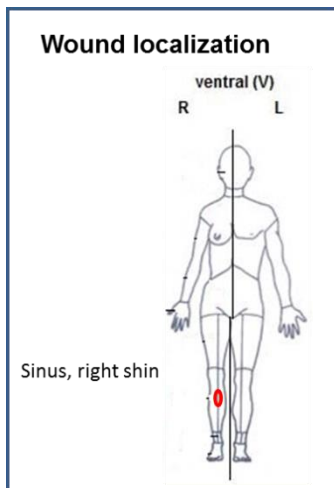

### 3. Medical History

Nil of significance

#### Wound History:

Wound observed since: 11/2011

BU- Treatment: 13/11/13- 15/01/14

Chronic osteomyelitis (confirmed by X-ray- see below)

### 4. Physical examination

*Body- Mass- index (BMI) 18.96 kg KG/m<sup>2</sup>*

*All systems normal*

### 5. Current Medication

Streptomycin 750mg, Rifampicin 450mg. 56 doses taken

Ciprofloxacin (6weeks on account of osteomyelitis)

## 6. Laboratory

BU confirmation: PCR (+) ZN (-) for *M. ulcerans*

Retroscreen: Non reactive

## 7. Microbiology

Repeated (3x) cultures of sinus aspirate: *Proteus mirabilis* isolated

## 8. Photo documentation:

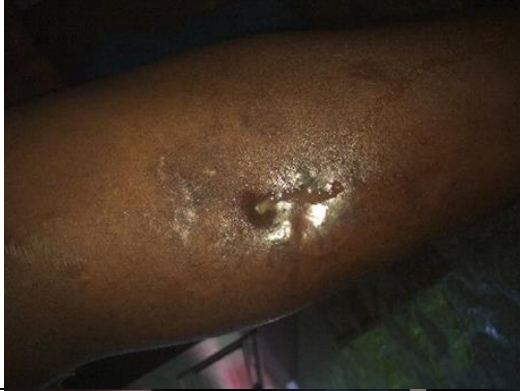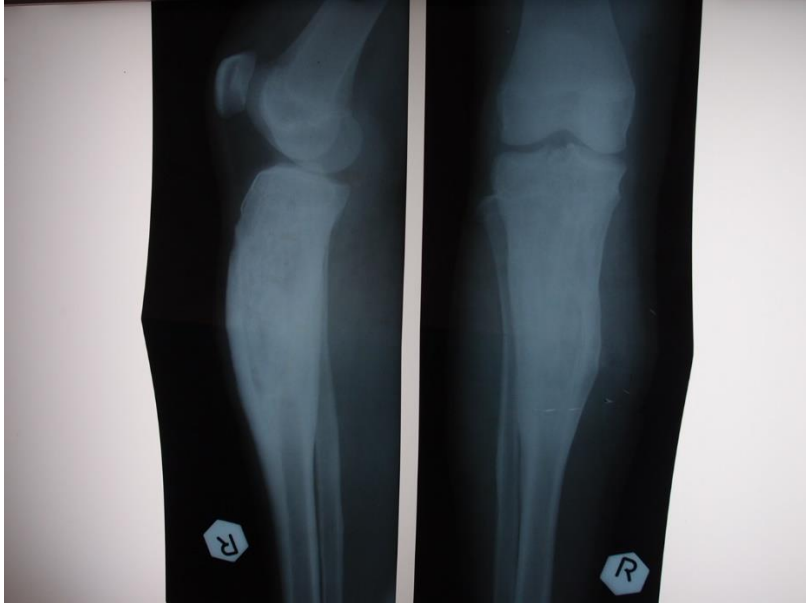



# Case Report OBOM

## Chronic Buruli Ulcer Wounds

Patient No. 020

### 1. Demographic data

Sex: Male  
Age: 33 years

### 2. Wound description

BU Category III (see Photo documentation)

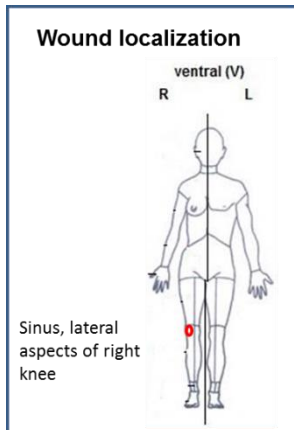

### 3. Medical History

Nil of significance

#### Wound History:

Wound observed since: 06/2013

BU- Treatment: 05/02/14- 02/04/14

Chronic osteomyelitis (confirmed by X-ray- see below)

### 4. Physical examination

Body- Mass- index (BMI) 22.05 kg KG/m<sup>2</sup>

All systems normal

### 5. Current Medication

Streptomycin 1000mg, Rifampicin 600mg. 56 doses taken

Ciprofloxacin (6weeks on account of osteomyelitis)

Rifampicin for additional 6 weeks on account of osteomyelitis

## 6. Laboratory

BU confirmation: PCR (+) ZN (+) for *M. ulcerans*

Retroscreen: Non reactive

## 7. Microbiology

Repeated (3x) cultures of sinus aspirate: *S.aureus* isolated

## 8. Photo documentation:

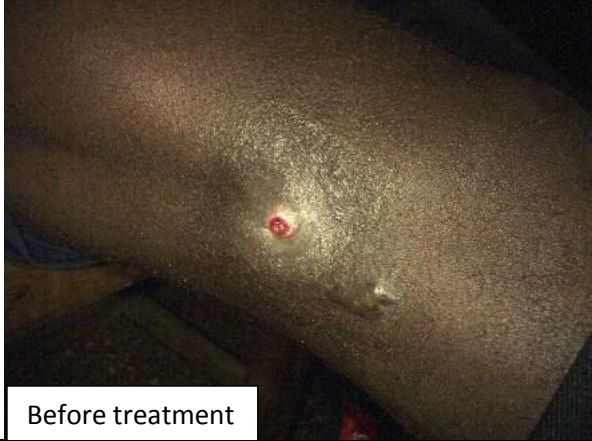

Before treatment

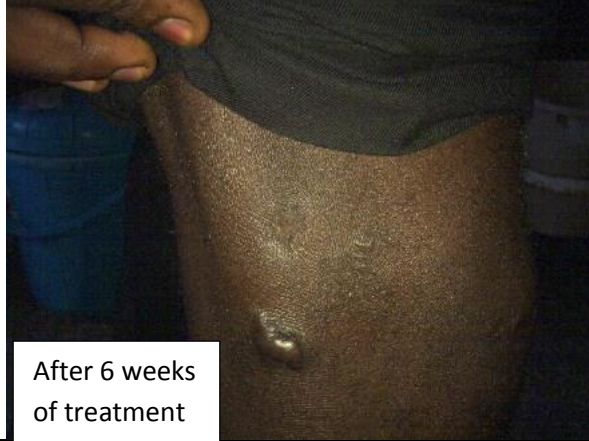

After 6 weeks  
of treatment

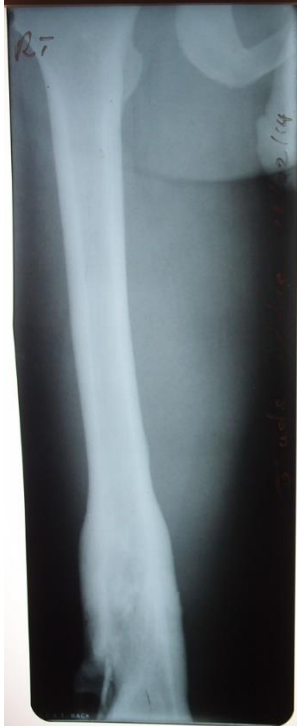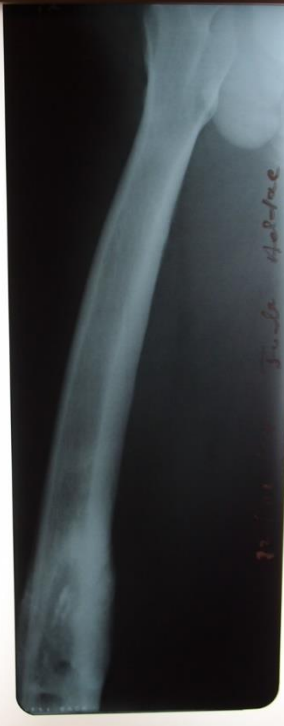

# Case Report OBOM

## Chronic Buruli Ulcer Wounds

Patient No. 005

### 1. Demographic data

Sex: Female  
Age: 22 years

### 2. Wound description

BU Category III (see Photo documentation)

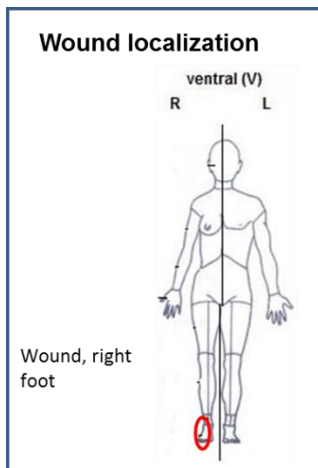

### 3. Medical History

Nil of significance

#### Wound History:

Wound observed since: 02/2013

Wounds at the same localization on 2 previous occasions:

2001- 2004 (healed)

01/2010- 03/2011 (healed)

BU- Treatment: 01-03/2011

02/2014 wound biopsy for histopathology

Results: well differentiated invasive squamous cell carcinoma

02/2014 chest X-ray: "lung fields look normal"

X-ray of right foot: 2 lateral digits together with metatarsals absent

### 4. Physical examination

Body- Mass- index (BMI) 16.73 kg KG/m<sup>2</sup>

Very pale, slightly jaundiced

Hepatomegaly, 2 cm below costal margin.

Spleen not palpable.

Inguinal lymph nodes enlarged

### 5. Current Medication

Streptomycin 1000mg, Rifampicin 600mg. 56 doses taken

Diclofenac, Tramadol, Fersolate, Vitamin C

## 6. Laboratory

BU confirmation: PCR (+) ZN (+) for *M. ulcerans*

Retroscreen: Non reactive

Hb: 5.5g/dl

## 7. Microbiology

Wound culture: *Proteus Mirabilis* isolated

## 8. Photo documentation:

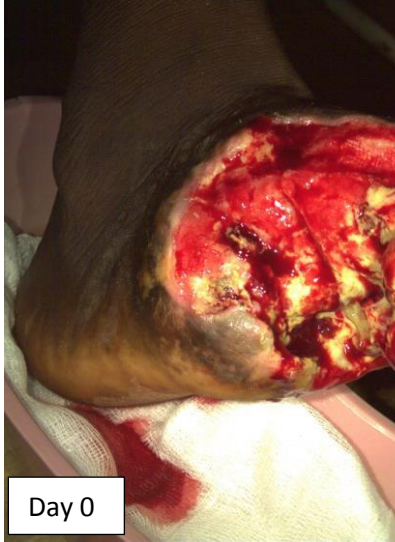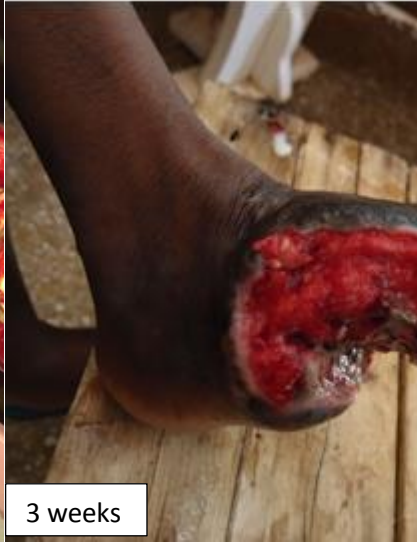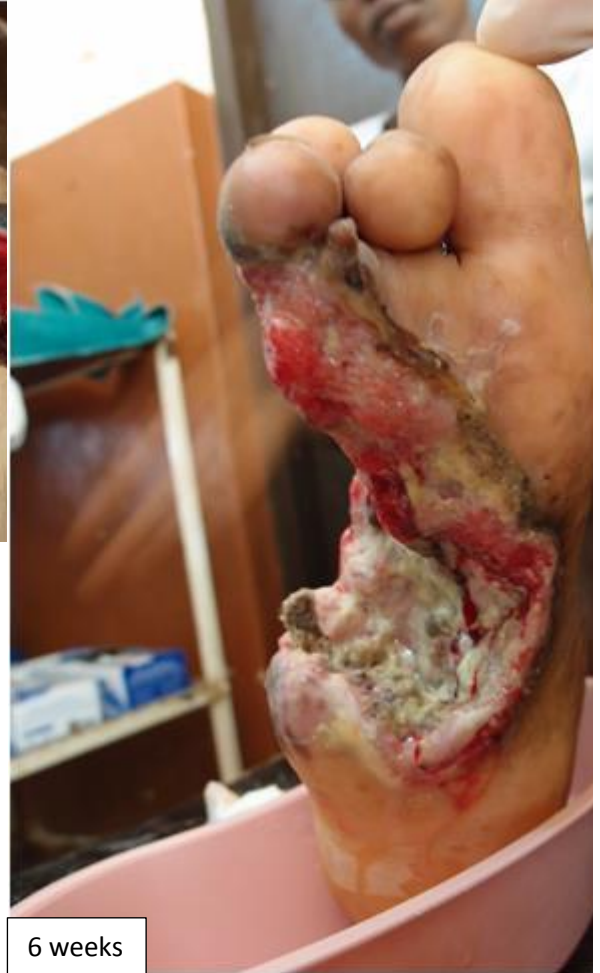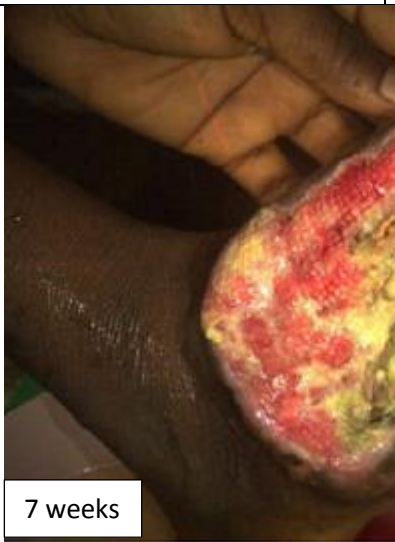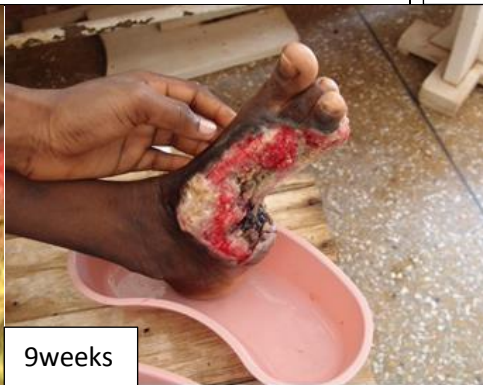

Supplement: pntd.0005331.s005.pdf [file pntd.0005331.s005.pdf]
