# Supplementary material for: Assessing and managing wounds of Buruli ulcer patients at the primary and secondary health care levels in Ghana
Source: PubMed Central journal article supplement (PMC5345880; doi:10.1371/journal.pntd.0005331), 2017-02-28
Supplement: pntd.0005331.s003.pdf [file pntd.0005331.s003.pdf]

|                |       |                                                                                      |                                                                                         |
|----------------|-------|--------------------------------------------------------------------------------------|-----------------------------------------------------------------------------------------|
| BU-WOUND-STUDY | DAY 0 | Side Code <input type="checkbox"/> <input type="checkbox"/> <input type="checkbox"/> | Patient's NO <input type="checkbox"/> <input type="checkbox"/> <input type="checkbox"/> |
|----------------|-------|--------------------------------------------------------------------------------------|-----------------------------------------------------------------------------------------|

|                             |
|-----------------------------|
| Date: __. __. __ (dd/mm/yy) |
|-----------------------------|

|                  |
|------------------|
| Demographic data |
|------------------|

|                       |                                         |
|-----------------------|-----------------------------------------|
| Informed consent form | <input checked="" type="radio"/> signed |
|-----------------------|-----------------------------------------|

Sex:  Male  Female

Date of birth: \_\_. \_\_. \_\_. \_\_. \_\_. \_\_ (dd/mm/yy) if unknown, age in complete years: \_\_ \_\_

Place of birth: \_\_\_\_\_

Home village/ district: \_\_\_\_\_

Residence: \_\_\_\_\_

Profession / current job: \_\_\_\_\_

|                                                            |                                                                                   |                                                                                 |                                                    |
|------------------------------------------------------------|-----------------------------------------------------------------------------------|---------------------------------------------------------------------------------|----------------------------------------------------|
| Educational background<br>If yes please indicate the level | <input checked="" type="radio"/> Yes                                              | <input checked="" type="radio"/> None                                           |                                                    |
|                                                            | <input checked="" type="radio"/> Primary                                          | <input checked="" type="radio"/> Secondary                                      | <input checked="" type="radio"/> Tertiary          |
| Religion                                                   | <input checked="" type="radio"/> Christian                                        | <input checked="" type="radio"/> Moslem                                         | <input checked="" type="radio"/> Traditional       |
|                                                            | <input checked="" type="radio"/> Others: _____                                    |                                                                                 |                                                    |
| Hospital status                                            | <input checked="" type="radio"/> hospitalized,<br>since: __. __. __<br>(dd.mm.yy) | <input checked="" type="radio"/> outpatient,<br>since: __. __. __<br>(dd.mm.yy) | <input checked="" type="radio"/> newly<br>admitted |

|                         |
|-------------------------|
| Present medical history |
|-------------------------|

|                              |                                                          |                                     |                                               |
|------------------------------|----------------------------------------------------------|-------------------------------------|-----------------------------------------------|
| Diabetes                     | <input checked="" type="radio"/> Yes                     | <input checked="" type="radio"/> No | <input checked="" type="radio"/> Unknown      |
| TB                           | <input checked="" type="radio"/> Yes                     | <input checked="" type="radio"/> No | <input checked="" type="radio"/> Unknown      |
| Hepatitis                    | <input checked="" type="radio"/> Yes                     | <input checked="" type="radio"/> No | <input checked="" type="radio"/> Unknown      |
| Congestive heart failure     | <input checked="" type="radio"/> Yes                     | <input checked="" type="radio"/> No | <input checked="" type="radio"/> Unknown      |
| Sickle cell disease          | <input checked="" type="radio"/> Yes                     | <input checked="" type="radio"/> No | <input checked="" type="radio"/> Unknown      |
| HIV                          | <input checked="" type="radio"/> Yes                     | <input checked="" type="radio"/> No | <input checked="" type="radio"/> Unknown      |
| Hearing impairment/ disorder | <input checked="" type="radio"/> Yes                     | <input checked="" type="radio"/> No | <input checked="" type="radio"/> Unknown      |
| Cough                        | <input checked="" type="radio"/> Yes                     | <input checked="" type="radio"/> No | <input checked="" type="radio"/> Unknown      |
| Allergies                    | <input checked="" type="radio"/> Yes                     | <input checked="" type="radio"/> No | <input checked="" type="radio"/> Unknown      |
|                              | if yes, please specify: _____                            |                                     |                                               |
| Other diseases               | <input checked="" type="radio"/> Yes                     | <input checked="" type="radio"/> No | <input checked="" type="radio"/> Unknown      |
|                              | if yes, please specify: _____                            |                                     |                                               |
| Drugs currently taken        | <input checked="" type="radio"/> Yes                     | <input checked="" type="radio"/> No | <input checked="" type="radio"/> Unknown      |
|                              | If yes, please list the names of the drugs : _____       |                                     |                                               |
| Pregnancy                    | <input checked="" type="radio"/> Yes                     | <input checked="" type="radio"/> No | <input checked="" type="radio"/> Unknown      |
| Smoker                       | <input checked="" type="radio"/> Yes                     | <input checked="" type="radio"/> No |                                               |
|                              | if yes, please specify: __ __ sticks/day for __ __ years |                                     |                                               |
| Alcohol                      | <input checked="" type="radio"/> daily                   | <input checked="" type="radio"/> No | <input checked="" type="radio"/> occasionally |

|                |       |                                                                                      |                                                                                         |
|----------------|-------|--------------------------------------------------------------------------------------|-----------------------------------------------------------------------------------------|
| BU-WOUND-STUDY | DAY 0 | Side Code <input type="checkbox"/> <input type="checkbox"/> <input type="checkbox"/> | Patient's NO <input type="checkbox"/> <input type="checkbox"/> <input type="checkbox"/> |
|----------------|-------|--------------------------------------------------------------------------------------|-----------------------------------------------------------------------------------------|

|                      |
|----------------------|
| Physical examination |
|----------------------|

Weight: \_\_\_ \_\_ kg

Height \_\_, \_\_\_ m

Body temperature (axillary): \_\_\_ \_\_, \_ °C

**Skin -Ulcer(s) / nodule(s) fill in separate form(s)**

|                            |                              |                            |
|----------------------------|------------------------------|----------------------------|
| Paleness (palms)           | <input type="radio"/> 1 Yes  | <input type="radio"/> 0 No |
| Jaundice (sclera)          | <input type="radio"/> 1 Yes  | <input type="radio"/> 0 No |
| Rash                       | <input type="radio"/> 1 Yes* | <input type="radio"/> 0 No |
| Oedema                     | <input type="radio"/> 1 Yes* | <input type="radio"/> 0 No |
| Scar(s)                    | <input type="radio"/> 1 Yes* | <input type="radio"/> 0 No |
| BCG- vaccination scar      | <input type="radio"/> 1 Yes  | <input type="radio"/> 0 No |
| Pigmentation abnormalities | <input type="radio"/> 1 Yes* | <input type="radio"/> 0 No |
| Varicose veins             | <input type="radio"/> 1 Yes* | <input type="radio"/> 0 No |
| Others                     | <input type="radio"/> 1 Yes  | <input type="radio"/> 0 No |
| If yes, please specify:    |                              |                            |

\* if yes fill in separate form

**Lymph nodes**

|                                                                    |                                     |                                    |
|--------------------------------------------------------------------|-------------------------------------|------------------------------------|
| Palpable                                                           | <input type="radio"/> 1 Yes         | <input type="radio"/> 0 No         |
| If yes:                                                            | <input type="radio"/> 1 generalized | <input type="radio"/> 2 head/ neck |
|                                                                    | <input type="radio"/> 3 armpit      | <input type="radio"/> 4 groin      |
| Painful on palpation                                               | <input type="radio"/> 1 Yes         | <input type="radio"/> 0 No         |
| Skin above palpable lymph node warmer compared to surrounding skin | <input type="radio"/> 1 Yes         | <input type="radio"/> 0 No         |

**Cardiovascular system**

|                |                             |                            |
|----------------|-----------------------------|----------------------------|
| Pulse          | ___ ___ / minute            |                            |
| Blood pressure | systolic ___ ___ mm Hg      | diastolic ___ ___ mmHg     |
| Heart murmur   | <input type="radio"/> 1 Yes | <input type="radio"/> 0 No |
|                | if yes, specify:            |                            |

**Respiratory system**

- 1 abnormalities detected if yes, specify \_\_\_\_\_  
 0 No abnormalities detected

|                |       |                                                                                      |                                                                                         |
|----------------|-------|--------------------------------------------------------------------------------------|-----------------------------------------------------------------------------------------|
| BU-WOUND-STUDY | DAY 0 | Side Code <input type="checkbox"/> <input type="checkbox"/> <input type="checkbox"/> | Patient's NO <input type="checkbox"/> <input type="checkbox"/> <input type="checkbox"/> |
|----------------|-------|--------------------------------------------------------------------------------------|-----------------------------------------------------------------------------------------|

**Abdomen**

|                                           |                           |                          |
|-------------------------------------------|---------------------------|--------------------------|
| Liver palpable                            | <input type="radio"/> Yes | <input type="radio"/> No |
| if yes, size __ __ cm below costal margin |                           |                          |
| Spleen palpable                           | <input type="radio"/> Yes | <input type="radio"/> No |
| if yes, size __ __ cm below costal margin |                           |                          |
| Abdomen tender on palpation               | <input type="radio"/> Yes | <input type="radio"/> No |
| if yes, specify:                          |                           |                          |
| Other abnormalities (ascites)             | <input type="radio"/> Yes | <input type="radio"/> No |
| If yes, specify:                          |                           |                          |

**CNS**

|                   |                           |                          |
|-------------------|---------------------------|--------------------------|
| Disorientation    | <input type="radio"/> Yes | <input type="radio"/> No |
| if yes, specify:  |                           |                          |
| Motor dysfunction | <input type="radio"/> Yes | <input type="radio"/> No |
| if yes, specify:  |                           |                          |
| Gait deviation    | <input type="radio"/> Yes | <input type="radio"/> No |
| if yes, specify:  |                           |                          |

|                |       |                                                                                      |                                                                                         |
|----------------|-------|--------------------------------------------------------------------------------------|-----------------------------------------------------------------------------------------|
| BU-WOUND-STUDY | DAY 0 | Side Code <input type="checkbox"/> <input type="checkbox"/> <input type="checkbox"/> | Patient's NO <input type="checkbox"/> <input type="checkbox"/> <input type="checkbox"/> |
|----------------|-------|--------------------------------------------------------------------------------------|-----------------------------------------------------------------------------------------|

**Lesion general information**

|                                                                             |                                                                              |
|-----------------------------------------------------------------------------|------------------------------------------------------------------------------|
| <b>Ulcer(s)</b> <input type="radio"/> single <input type="radio"/> multiple | <b>Nodule(s)</b> <input type="radio"/> single <input type="radio"/> multiple |
|-----------------------------------------------------------------------------|------------------------------------------------------------------------------|

Site of ulcer(s) / nodule(s)

(sketch and number all lesions and fill in one CRF per lesion)

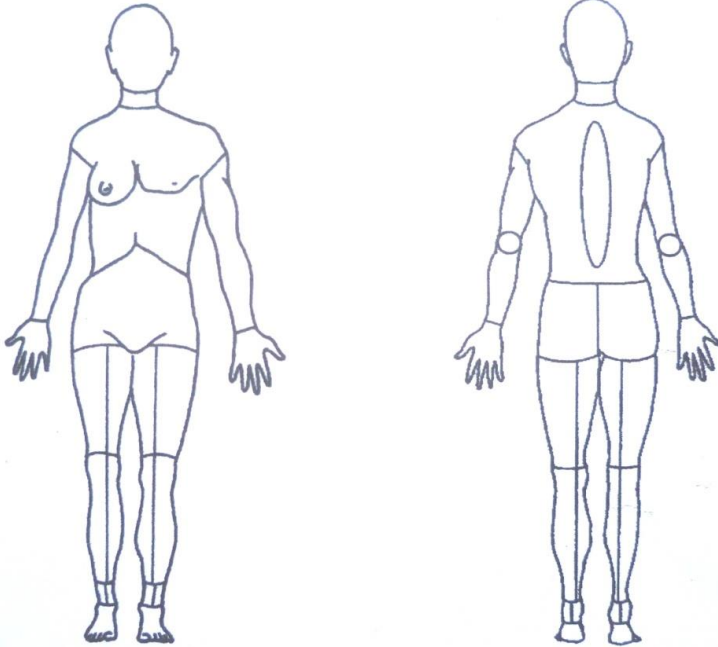

|                                                      |                                     |                             |
|------------------------------------------------------|-------------------------------------|-----------------------------|
| Ulcer/ nodules in family members?                    | ① Yes, specify: _____               | ② No                        |
| Ulcer/nodules among other household member?          | ① Yes, specify: _____               | ② No                        |
| Patient's expectations of the end point of treatment | ① complete healing of ulcer         | ② complete function of limb |
|                                                      | ③ odour management                  | ④ other:                    |
| Patient's expectation of treatment time              | __ __ years __ __ months __ __ days |                             |

|                |       |                                                                                      |                                                                                         |
|----------------|-------|--------------------------------------------------------------------------------------|-----------------------------------------------------------------------------------------|
| BU-WOUND-STUDY | DAY 0 | Side Code <input type="checkbox"/> <input type="checkbox"/> <input type="checkbox"/> | Patient's NO <input type="checkbox"/> <input type="checkbox"/> <input type="checkbox"/> |
|----------------|-------|--------------------------------------------------------------------------------------|-----------------------------------------------------------------------------------------|

**Lesion specific**

|                                                                |                                      |
|----------------------------------------------------------------|--------------------------------------|
| ulcer <input type="checkbox"/> nodule <input type="checkbox"/> | ulcer / nodule localization: ___ ___ |
|----------------------------------------------------------------|--------------------------------------|

**History**

observed since \_\_\_\_ . \_\_\_\_ . \_\_\_\_ (dd/mm/yy)      If unknown, duration in years \_\_\_ months \_\_\_ weeks \_\_\_

|                                                                     |                           |                          |
|---------------------------------------------------------------------|---------------------------|--------------------------|
| Consultation in a health facility before<br>If yes, please specify: | <input type="radio"/> Yes | <input type="radio"/> No |
| Wound dressing                                                      | <input type="radio"/> Yes | <input type="radio"/> No |
| Surgery                                                             | <input type="radio"/> Yes | <input type="radio"/> No |
| Antimycobacterial agents<br>if yes, specify:                        | <input type="radio"/> Yes | <input type="radio"/> No |
| Other drugs/ herbals<br>If yes, specify:                            | <input type="radio"/> Yes | <input type="radio"/> No |
| Traditional treatment<br>If yes, specify:                           | <input type="radio"/> Yes | <input type="radio"/> No |
| History of trauma at site of lesion?<br>if yes, specify             | <input type="radio"/> Yes | <input type="radio"/> No |

**Present complaints**

|      |                            |                          |
|------|----------------------------|--------------------------|
| Pain | <input type="radio"/> Yes* | <input type="radio"/> No |
|------|----------------------------|--------------------------|

\*if yes, specify in the visual analog scale (VAS):

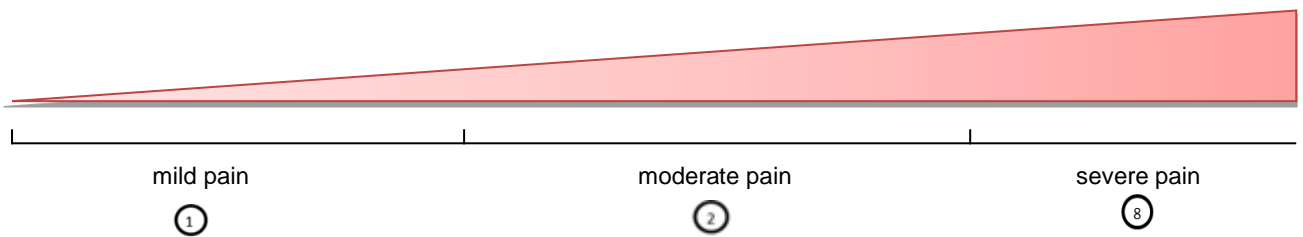

|                            |                           |                          |
|----------------------------|---------------------------|--------------------------|
| Itching                    | <input type="radio"/> Yes | <input type="radio"/> No |
| Restriction of movement    | <input type="radio"/> Yes | <input type="radio"/> No |
| Others<br>if yes, specify: | <input type="radio"/> Yes | <input type="radio"/> No |

**Size**

Max. diameter:      \_\_\_ \_\_\_ mm

Area of the wound      \_\_\_ \_\_\_ mm<sup>2</sup>

Max. diameter:      \_\_\_ \_\_\_ mm

Area of the induration      \_\_\_ \_\_\_ mm<sup>2</sup>

|                |       |                                                                                                                                                                                               |                                                                                                                                                                                                  |
|----------------|-------|-----------------------------------------------------------------------------------------------------------------------------------------------------------------------------------------------|--------------------------------------------------------------------------------------------------------------------------------------------------------------------------------------------------|
| BU-WOUND-STUDY | DAY 0 | Side Code <input style="width: 20px; height: 20px;" type="checkbox"/> <input style="width: 20px; height: 20px;" type="checkbox"/> <input style="width: 20px; height: 20px;" type="checkbox"/> | Patient's NO <input style="width: 20px; height: 20px;" type="checkbox"/> <input style="width: 20px; height: 20px;" type="checkbox"/> <input style="width: 20px; height: 20px;" type="checkbox"/> |
|----------------|-------|-----------------------------------------------------------------------------------------------------------------------------------------------------------------------------------------------|--------------------------------------------------------------------------------------------------------------------------------------------------------------------------------------------------|

**Margin of ulcer**

|                       |                                |                                         |
|-----------------------|--------------------------------|-----------------------------------------|
| Undermined            | <input type="radio"/> Yes      | <input type="radio"/> No                |
| Collapsed             | <input type="radio"/> Yes      | <input type="radio"/> No                |
| Specify, if possible: | <input type="radio"/> flat     | <input type="radio"/> edematous         |
|                       | <input type="radio"/> Red      | <input type="radio"/> epithelialization |
|                       | <input type="radio"/> Scarring | <input type="radio"/> other:            |

**Moisture balance**

|       |                           |                          |
|-------|---------------------------|--------------------------|
| Dry   | <input type="radio"/> Yes | <input type="radio"/> No |
| Moist | <input type="radio"/> Yes | <input type="radio"/> No |

**Wound base**

|                        |                             |                               |
|------------------------|-----------------------------|-------------------------------|
| Cotton wool appearance | <input type="radio"/> Yes   | <input type="radio"/> No      |
| Granulation tissue     | <input type="radio"/> Yes   | <input type="radio"/> No      |
| Fibrinous              | <input type="radio"/> Yes   | <input type="radio"/> No      |
| Necrotic               | <input type="radio"/> Yes   | <input type="radio"/> No      |
| Odor                   | <input type="radio"/> Yes   | <input type="radio"/> No      |
| Discharge              | <input type="radio"/> clear | <input type="radio"/> bloody  |
|                        | <input type="radio"/> Pus   | <input type="radio"/> others: |

**Surrounding skin**

|               |                           |                          |
|---------------|---------------------------|--------------------------|
| Induration    | <input type="radio"/> Yes | <input type="radio"/> No |
|               | Size _____                |                          |
| Discoloration | <input type="radio"/> Yes | <input type="radio"/> No |
|               | Size _____                |                          |
| Oedema        | <input type="radio"/> Yes | <input type="radio"/> No |
|               | Size _____                |                          |
| Redness       | <input type="radio"/> Yes | <input type="radio"/> No |
| ΔT            | <input type="radio"/> Yes | <input type="radio"/> No |

**Photographs**

Photographs taken  Yes  No

if no, please specify reason \_\_\_\_\_

if yes, fill in the nos:

Picture nos: \_\_\_\_\_, \_\_\_\_\_, \_\_\_\_\_, \_\_\_\_\_, \_\_\_\_\_

Investigator(s) signature(s):
