# Supplementary material for: Assessing and managing wounds of Buruli ulcer patients at the primary and secondary health care levels in Ghana
Source: PubMed Central journal article supplement (PMC5345880; doi:10.1371/journal.pntd.0005331), 2017-02-28
Supplement: pntd.0005331.s004.pdf [file pntd.0005331.s004.pdf]

|                |           |                                                                                      |                                                                                         |
|----------------|-----------|--------------------------------------------------------------------------------------|-----------------------------------------------------------------------------------------|
| BU-WOUND-STUDY | FOLLOW-UP | Side Code <input type="checkbox"/> <input type="checkbox"/> <input type="checkbox"/> | Patient's NO <input type="checkbox"/> <input type="checkbox"/> <input type="checkbox"/> |
|----------------|-----------|--------------------------------------------------------------------------------------|-----------------------------------------------------------------------------------------|

Date: \_\_. \_\_. \_\_ (dd/mm/yy)

**General Information**

|                 |                                               |                                  |                                                                        |
|-----------------|-----------------------------------------------|----------------------------------|------------------------------------------------------------------------|
| Hospital status | <input checked="" type="radio"/> hospitalized | <input type="radio"/> outpatient | <input checked="" type="radio"/> discharge date: __. __. __ (dd/mm/yy) |
|-----------------|-----------------------------------------------|----------------------------------|------------------------------------------------------------------------|

**Body temperature (axillary):**      \_\_ \_\_, \_\_ °C

**Weight**      \_\_ \_\_ \_\_ kg

**Main treatment**

- Antimycobacteria agents: \_\_\_\_\_
- Physiotherapy/ physical rehabilitation
- Others: \_\_\_\_\_

**Present complaints and since last examination**

|      |                                       |                          |
|------|---------------------------------------|--------------------------|
| Pain | <input checked="" type="radio"/> Yes* | <input type="radio"/> No |
|------|---------------------------------------|--------------------------|

\* If yes, specify in the visual analog scale (VAS)

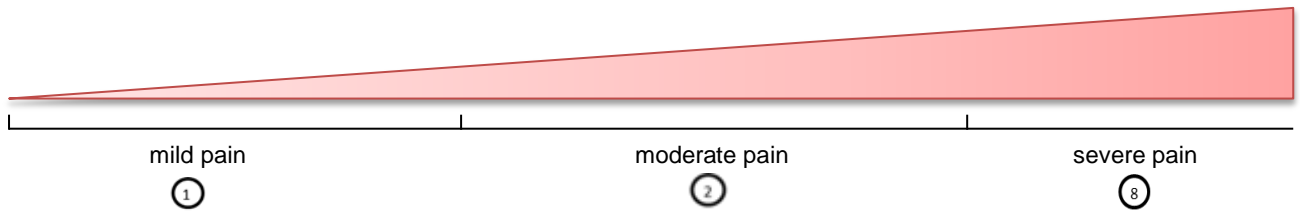

|                                |                                      |                          |
|--------------------------------|--------------------------------------|--------------------------|
| Is there an analgesic therapy? | <input checked="" type="radio"/> Yes | <input type="radio"/> No |
|                                | If yes, please specify:              |                          |
| Other complaints?              | <input checked="" type="radio"/> Yes | <input type="radio"/> No |
|                                | If yes, please specify:              |                          |

**Lymph nodes**

|                                                                    |                                         |                                              |                                  |
|--------------------------------------------------------------------|-----------------------------------------|----------------------------------------------|----------------------------------|
| Palpable                                                           | <input checked="" type="radio"/> Yes    | <input type="radio"/> No                     |                                  |
|                                                                    | If yes:                                 | <input checked="" type="radio"/> generalized | <input type="radio"/> head/ neck |
|                                                                    | <input checked="" type="radio"/> armpit | <input type="radio"/> groin                  |                                  |
| Painful on palpation                                               | <input checked="" type="radio"/> Yes    | <input type="radio"/> No                     |                                  |
| Skin above palpable lymph node warmer compared to surrounding skin | <input checked="" type="radio"/> Yes    | <input type="radio"/> No                     |                                  |

|                |           |                                                                                      |                                                                                         |
|----------------|-----------|--------------------------------------------------------------------------------------|-----------------------------------------------------------------------------------------|
| BU-WOUND-STUDY | FOLLOW-UP | Side Code <input type="checkbox"/> <input type="checkbox"/> <input type="checkbox"/> | Patient's NO <input type="checkbox"/> <input type="checkbox"/> <input type="checkbox"/> |
|----------------|-----------|--------------------------------------------------------------------------------------|-----------------------------------------------------------------------------------------|

**Lesion specific**

Fill in one form per lesion in patients with multiple lesions. Number the lesions as in the CRF "Day 0".

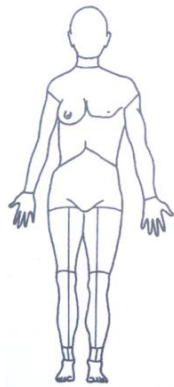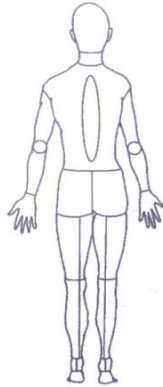

Ulcer  Nodule

Lesion Localization

**Main treatment**

- Dressing
- Excision
- Skin graft: Date: \_\_. \_\_. \_\_ (dd/mm/yy)
- Amputation : Date: \_\_. \_\_. \_\_ (dd/mm/yy)
- Debridement: Date: \_\_. \_\_. \_\_ (dd/mm/yy)
- Others: \_\_\_\_\_

**Wound Assessment**

**Size**

Max. diameter: \_\_\_\_\_ mm      Area of the wound \_\_\_\_\_ mm<sup>2</sup>  
 Max. diameter: \_\_\_\_\_ mm      Area of the induration \_\_\_\_\_ mm<sup>2</sup>

|                     |                                                  |                                     |
|---------------------|--------------------------------------------------|-------------------------------------|
| Epithelialization   | <input type="radio"/> Yes                        | <input type="radio"/> No            |
| Eschar              | <input type="radio"/> Yes                        | <input type="radio"/> No            |
| Exudation           | <input type="radio"/> Yes                        | <input type="radio"/> No            |
| Scarring            | <input type="radio"/> Yes                        | <input type="radio"/> No            |
| Moisture balance    | <input type="radio"/> dry                        | <input type="radio"/> moisture      |
| Wound base          | <input type="radio"/> clear discharge            | <input type="radio"/> necrotic      |
|                     | <input type="radio"/> white- cotton wool         | <input type="radio"/> fibrinous     |
| Granulation tissue  | <input type="radio"/> Yes                        | <input type="radio"/> No            |
|                     | If yes, specify:<br><input type="radio"/> normal | <input type="radio"/> discoloration |
|                     | <input type="radio"/> other:                     |                                     |
| Margin of the ulcer | <input type="radio"/> undermined                 | <input type="radio"/> collapsed     |
|                     | <input type="radio"/> flat                       | <input type="radio"/> edematous     |
|                     | <input type="radio"/> reddened                   |                                     |

|                |           |                                                                                      |                                                                                         |
|----------------|-----------|--------------------------------------------------------------------------------------|-----------------------------------------------------------------------------------------|
| BU-WOUND-STUDY | FOLLOW-UP | Side Code <input type="checkbox"/> <input type="checkbox"/> <input type="checkbox"/> | Patient's NO <input type="checkbox"/> <input type="checkbox"/> <input type="checkbox"/> |
|----------------|-----------|--------------------------------------------------------------------------------------|-----------------------------------------------------------------------------------------|

|                                |                                            |                                    |
|--------------------------------|--------------------------------------------|------------------------------------|
| Surrounding skin of the lesion | <input type="radio"/> induration, size:    | <input type="radio"/> oedema, size |
|                                | <input type="radio"/> discoloration, size: | <input type="radio"/> $\Delta T$   |
|                                | <input type="radio"/> redness              |                                    |

**Microbiological assessment**

|                                     |                              |                               |
|-------------------------------------|------------------------------|-------------------------------|
| Wound surface looks                 | <input type="radio"/> opaque | <input type="radio"/> yellow  |
|                                     | <input type="radio"/> green  |                               |
| Discharge<br>If yes please specify: | <input type="radio"/> Yes    | <input type="radio"/> No      |
|                                     | <input type="radio"/> clear  | <input type="radio"/> bloody  |
|                                     | <input type="radio"/> pus    | <input type="radio"/> others: |
| Odor                                | <input type="radio"/> Yes    | <input type="radio"/> No      |

**Laboratory**

|                                        |                            |                                |                                      |
|----------------------------------------|----------------------------|--------------------------------|--------------------------------------|
| Swab, Microbiology                     | <input type="radio"/> done | <input type="radio"/> not done | <input type="radio"/> not applicable |
| Blood sample                           | <input type="radio"/> done | <input type="radio"/> not done | <input type="radio"/> not applicable |
| Blood culture                          | <input type="radio"/> done | <input type="radio"/> not done | <input type="radio"/> not applicable |
| Punch biopsy                           | <input type="radio"/> done | <input type="radio"/> not done | <input type="radio"/> not applicable |
| Tissue samples (Debridement/ Excision) | <input type="radio"/> done | <input type="radio"/> not done | <input type="radio"/> not applicable |

**Photographs**

Photographs taken  Yes  No

if no, please specify reason \_\_\_\_\_

if yes, fill in the nos:

Picture nos: \_\_\_\_\_, \_\_\_\_\_, \_\_\_\_\_, \_\_\_\_\_, \_\_\_\_\_

**Investigator(s) signature(s):**
