# Supplementary material for: Assessing and managing wounds of Buruli ulcer patients at the primary and secondary health care levels in Ghana
Source: PubMed Central journal article supplement (PMC5345880; doi:10.1371/journal.pntd.0005331), 2017-02-28
Supplement: pntd.0005331.s006.pdf [file pntd.0005331.s006.pdf]

# Case Report AMH

## Sub-chronic Buruli Ulcer Wounds

Patient No. 001

### 1. Demographic data

Sex: Male  
Age: 15 years

### 2. Wound description

BU Category III (see Photo documentation)

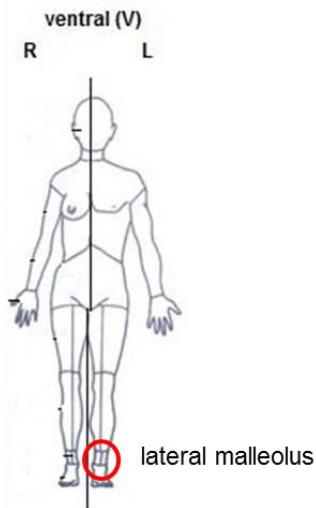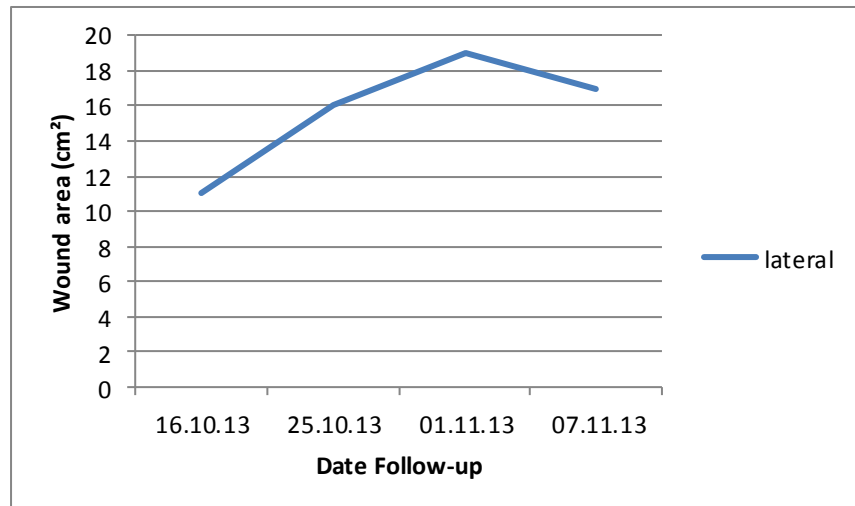

### 3. Medical History

Wound observed since: 04/2013  
since 09/2013 hospitalized at Municipal Hospital Amasaman  
09-11/2013 Antimycobacterial treatment with Rifampicin 300mg, Streptomycin 500mg (56d)  
08/11/2013 wound excision  
29/11/2013 split skin grafting

Secondary diagnoses  
No further diagnosis

### 4. Physical examination

Body-Mass-index (BMI) 15,79 kg KG/m<sup>2</sup>

All systems normal

Pain assessment: intermittent, severe pain at wound and wound surrounding (8/10)

### 5. Current Medication

No analgesic therapy

## 6. Laboratory

BU confirmation: 09/2013 ZN+/ PCR+ for M.ulcerans

|                     |                 |
|---------------------|-----------------|
| <b>Date</b>         | <b>05.11.13</b> |
| Hb [12-16g/dl]      | 13,2 g/dl       |
| HCT [37-51%]        | 39,10 %         |
| RBC [4,2- 6,3M/ul]  | 5,72 M/ul       |
| MCV [80-97fl]       | 68,4 fl         |
| MCH [26-32 pg]      | 23,1 pg         |
| MCHC [31-36 g/dl]   | 33,8 g/dl       |
| WBC [4.1-10.9 K/ul] | 8,2 K/ul        |
| ESR [5-15mmfall/h]  |                 |
| PLT [140-440 K/ul]  |                 |
| Sickling            | negative        |

## 7. Microbiology

Results of wound swabs

11/2013 Pseudomonas aeruginosa: sensitive to Amikacin, Gentamicin, Tobramycin

8. Photo documentary: Ulcer left leg, lateral malleolus

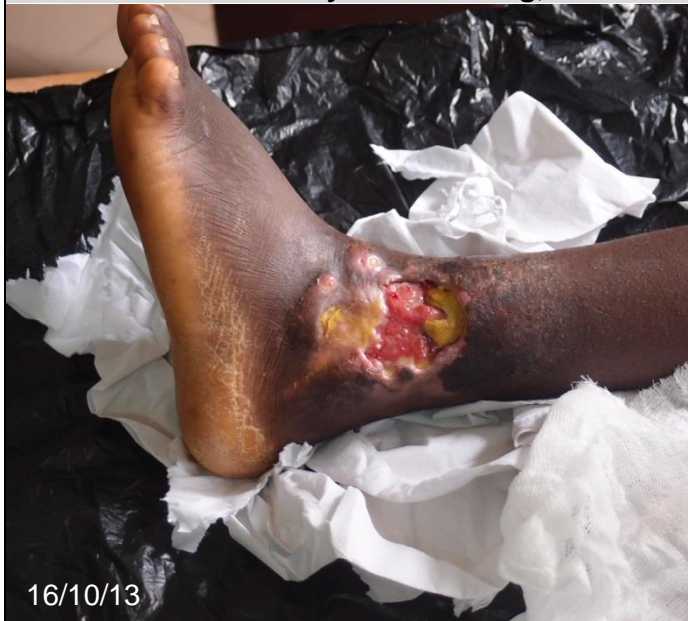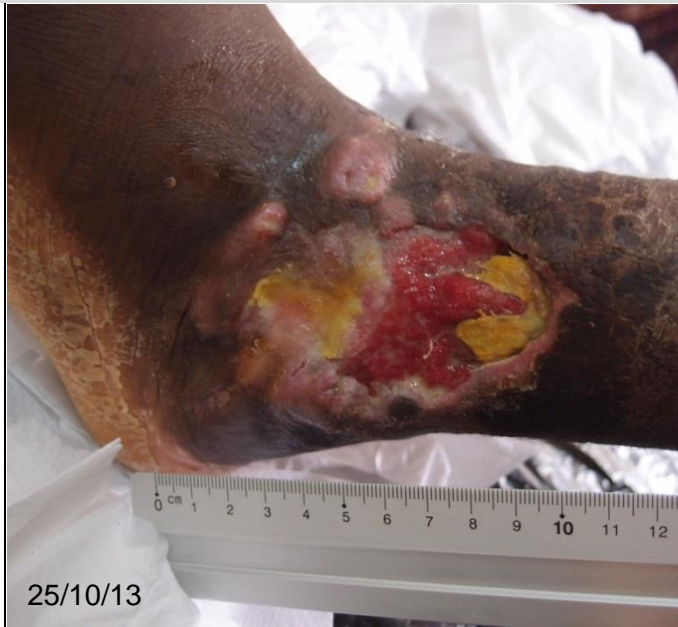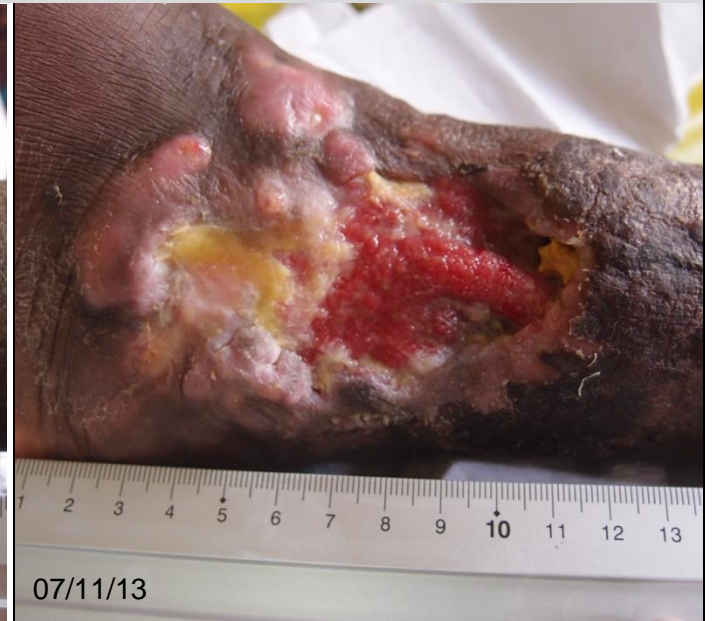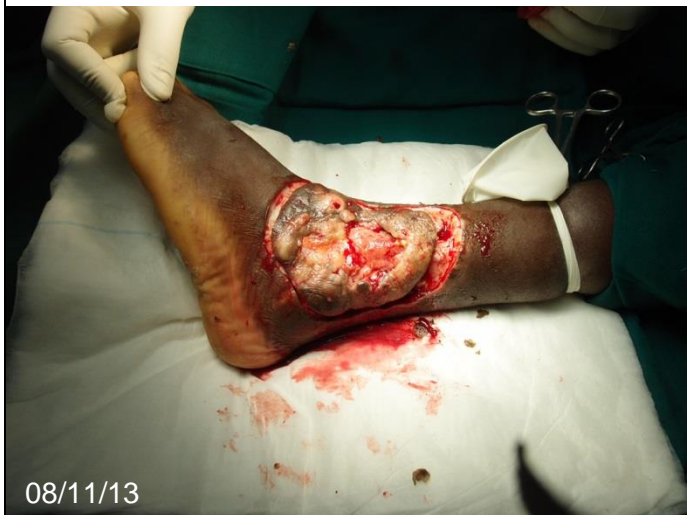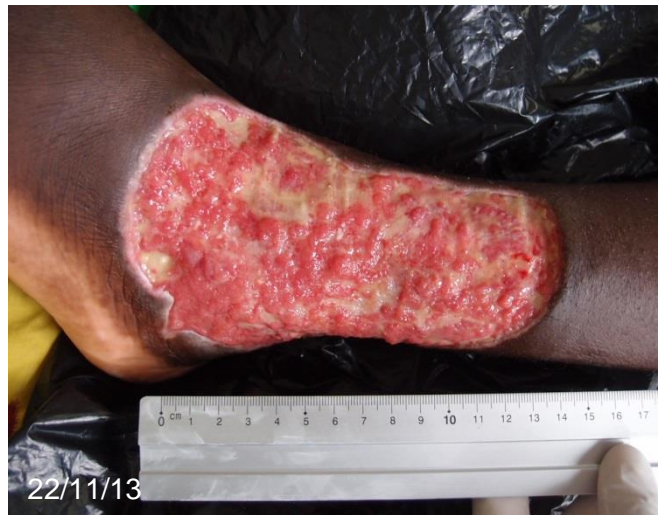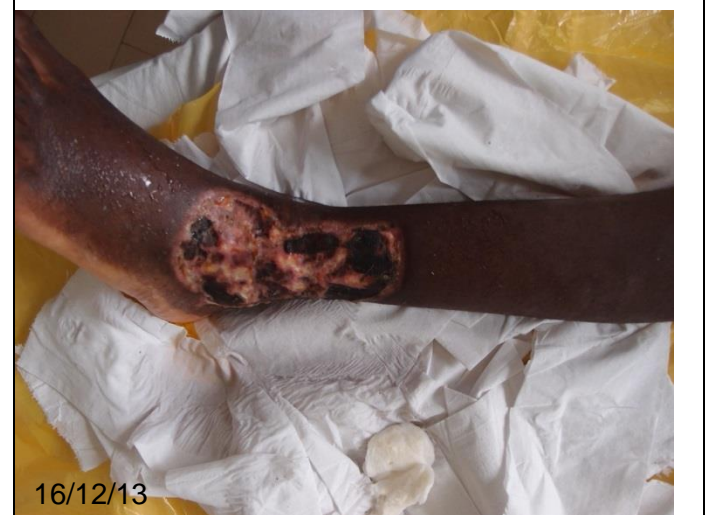

## Case Report AMH

### Chronic Buruli Ulcer Wounds

Patient No. 002

#### 1. Demographic data

Sex: Female  
Age: 27 years

#### 2. Wound description

BU Category III (see Photo documentation)

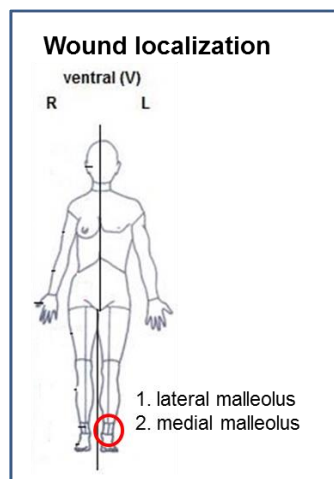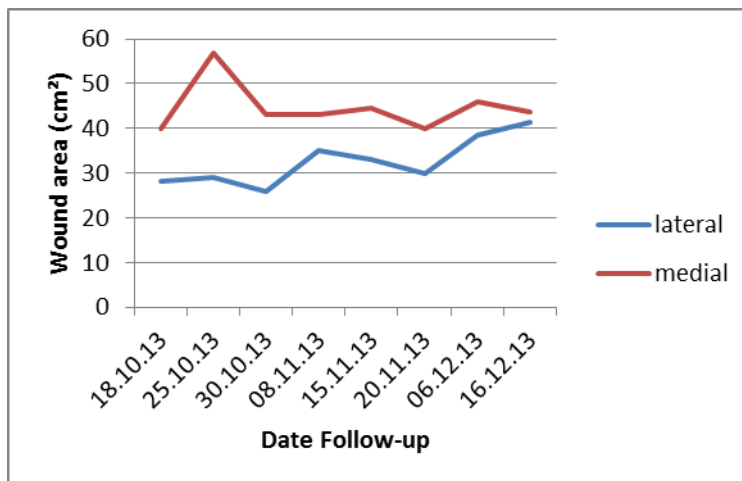

#### 3. Medical History

##### Secondary diagnoses

04/2013 Cellulites left leg  
05/2013 Gastritis, triple treatment *H. pylori*  
01/2014 Microcytic hypochromic anaemia  
01/2014 Infarction on the left in the temporo-parietal region adjacent the lateral ventricle with right facial paralysis, motoric dysfunction of the right arm  
02/2014 two pressure ulcers at gluteal region

##### Wound History

Wound observed since: medial: 09/2011  
lateral: 03/2012

hospitalized at Municipal Hospital Amasaman:  
since 09/2012

09-10/2012 BU treatment  
11/2012 wound excision on both sides  
02/2013 split skin grafting on both sides

#### 4. Physical examination

*Body-Mass-Index (BMI)* 26,67 kg KG/ m<sup>2</sup>

*All systems normal*

*Pain assessment:* constant, severe pain at wound and wound surrounding (7-9/10)

##### Movement of ankle joint

(dorsal extension/ plantar flexion)

left 10-0-40  
right 20-0-40

## 5. Current Medication

Streptomycin 100mg, Rifampicin 600mg. 20 doses taken  
Diclofenac 50mg + Paracetamol 500 (1-1-1)  
Folic acid, Vitamin B complex  
Zincofer

## 6. Laboratory

BU confirmation: 09/2012 ZN (+) PCR(+) for *M. ulcerans*

| Date                        | 24.01.14  | 05.02.14    |
|-----------------------------|-----------|-------------|
| Hb [12-16g/dl]              | 7,4 g/dl  |             |
| HCT [37-51]                 | 23,8%     |             |
| RBC [4,2- 6,3M/ul]          | 3,25 M/ul |             |
| MCV [80-97fl]               | 73,2 fl   |             |
| MCH [26-32 pg]              | 22,8 pg   |             |
| MCHC [31-36 g/dl]           | 31,1 g/dl |             |
| WBC [4.1-10.9 K/ul]         | 7,5 K/ul  |             |
| - Neutrophils [25-75%]      | - 68,6%   |             |
| - Lymphocytes [20-60%]      |           |             |
| - Monocytes [2-10%]         | - 27,2%   |             |
| - Eosinophils [1-6%]        |           |             |
| - Basophils [0-1%]          |           |             |
| PLT [140-440 K/ul]          | 345 K/ul  |             |
| Urea [2,1- 7,1 mmol/l]      |           | 4,8 mmol/l  |
| Creatinine [53- 106 umol/l] |           | 102 umol/l  |
| Albumin [35-52 g/l]         |           | 56 g/l      |
| T.Protein [60-78 g/l]       |           | 106 g/dl    |
| T.Bilirubin [5-21 umol/l]   |           | 15,9 umol/l |
| D.Bilirubin [<3,4 umol/l]   |           | 8,5 umol/l  |
| AST [<40U/l]                |           | 22 U/l      |
| ALT [<40U/l]                |           | 23 U/l      |
| Gamma GT [6-24 U/l]         |           | 22 U/l      |
| ALKP [<240U/L]              |           | 145 U/l     |

## 7. Microbiology

Results of wound swabs

02/2013 *S. aureus*: sensitive to Amikacin, Gentamicin, Tetracylin

11/2013 *Aeromonas salmonicida*: sensitive to Amikacin, Gentamicin, Ceftriaxone, Tobramycin

8. Photo documentation: Ulcer left leg, lateral malleolus

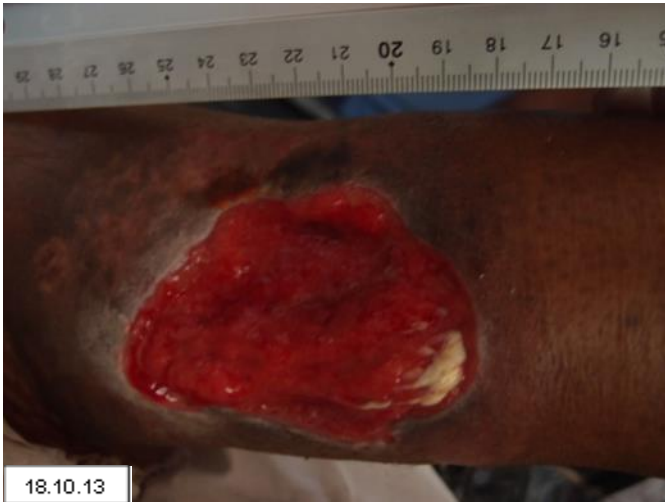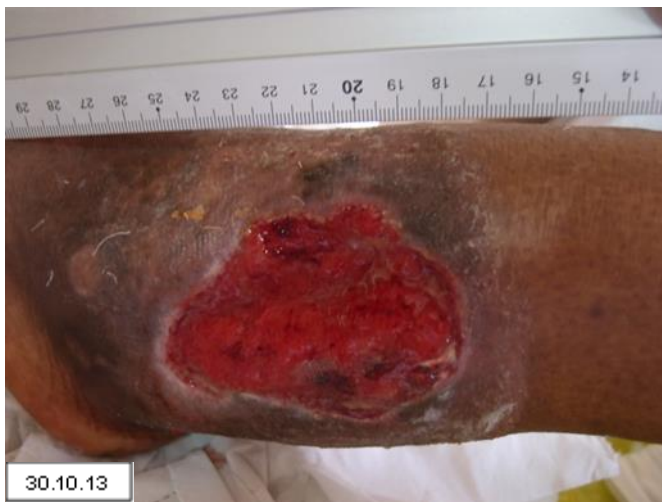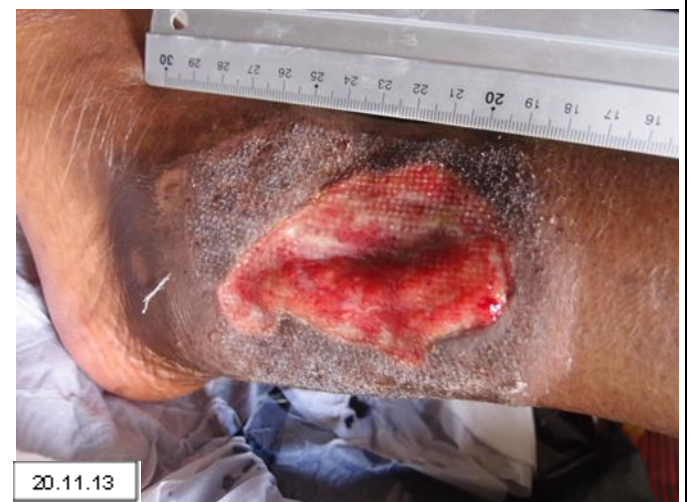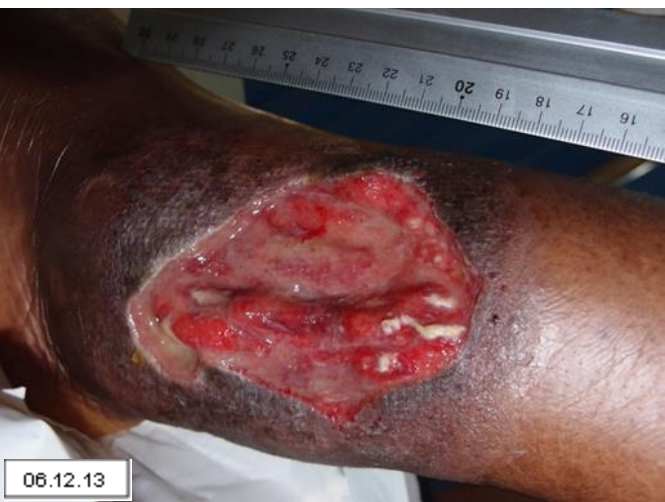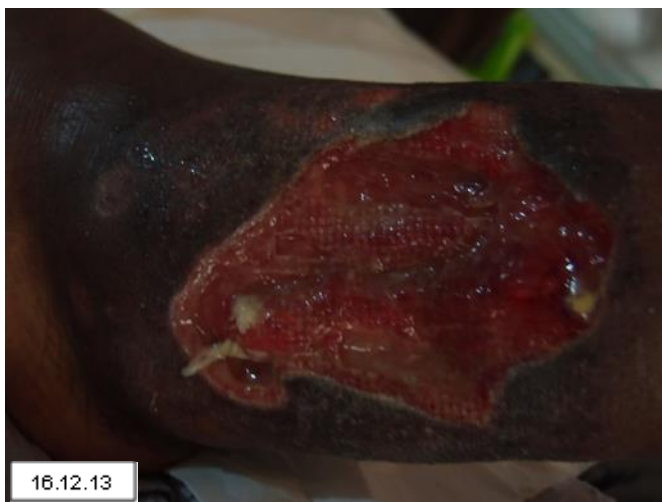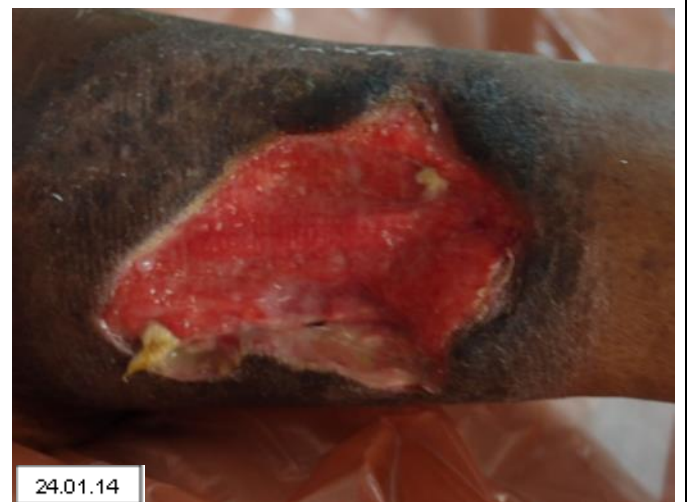

9. Photo documentation: Left leg, medial malleolus

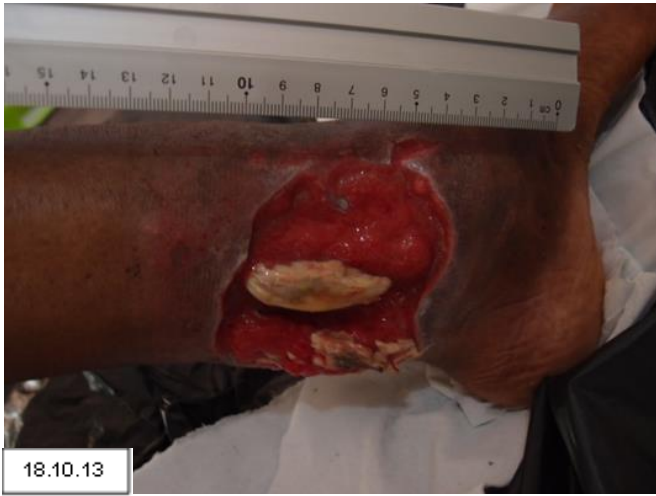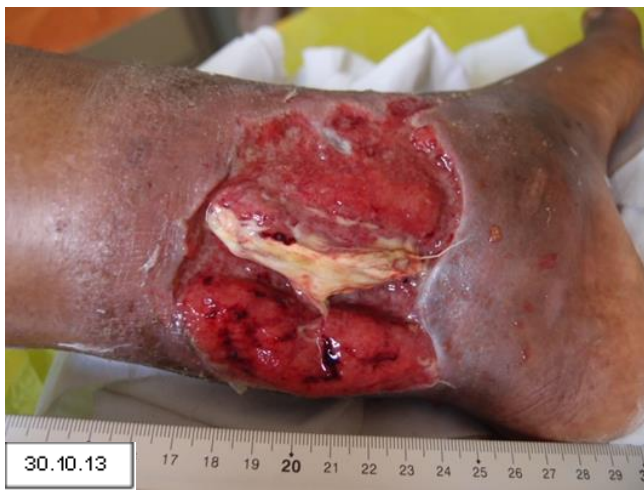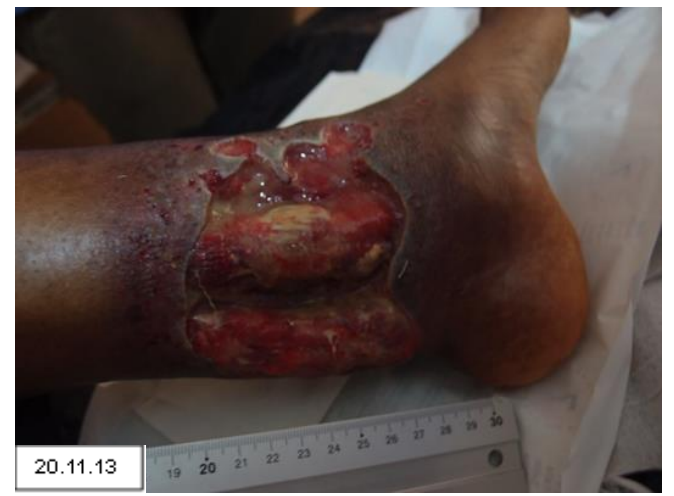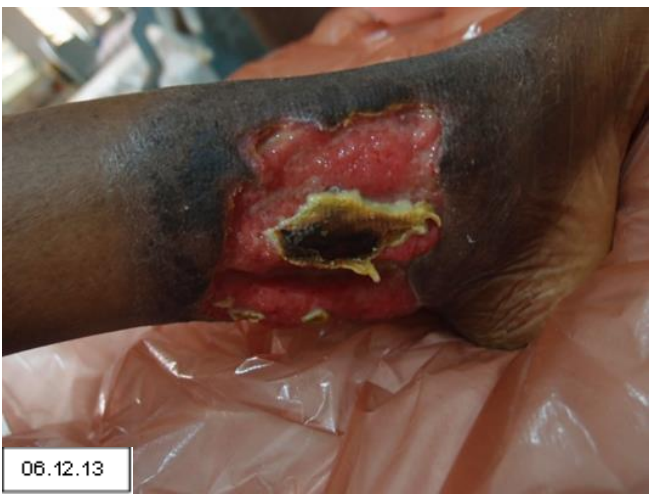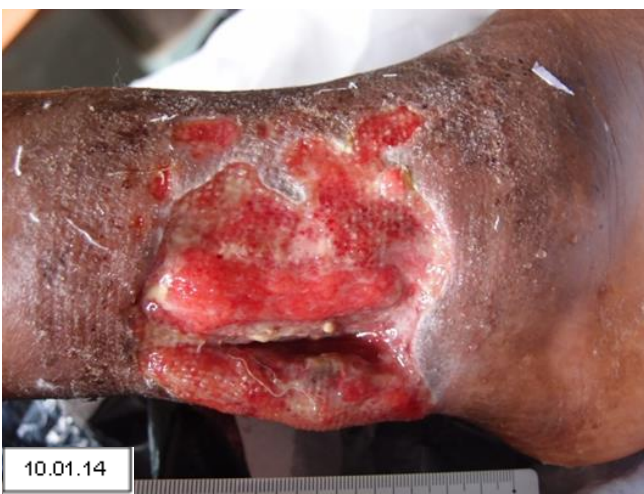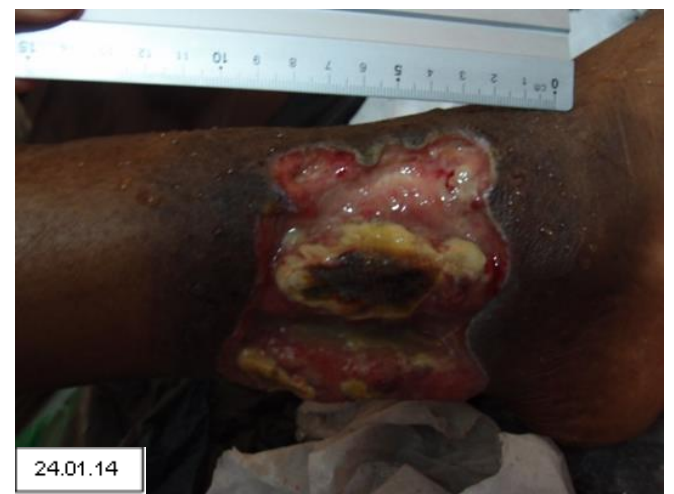

# Case Report AMH

## Chronic Buruli Ulcer Wounds

Patient No. 003

### 1. Demographic data

Sex: Female  
Age: 56 years

### 2. Wound description

BU Category III (see Photo documentation)

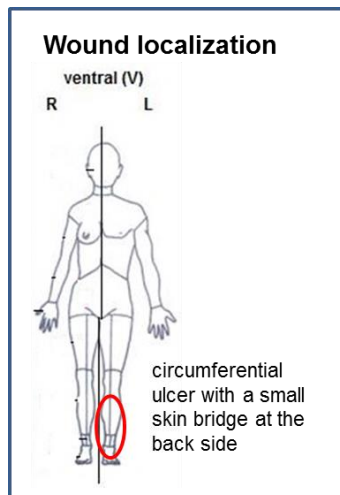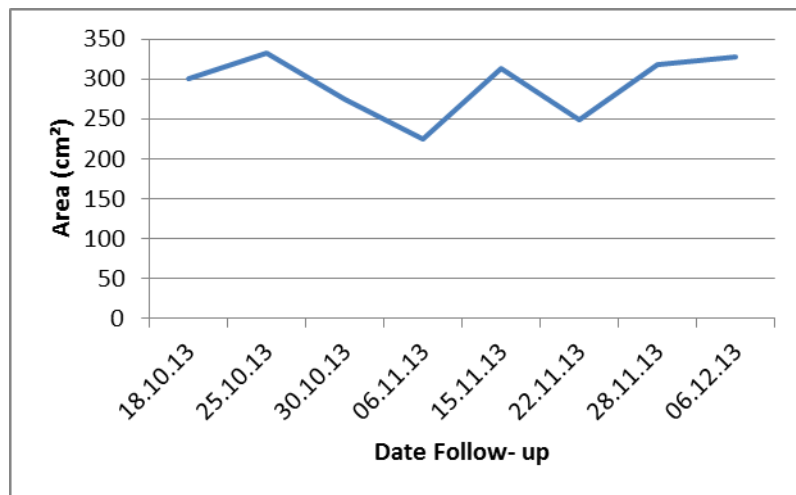

### 3. Medical History

#### Wound history

Wound observed since: around 2009

since 07/2013 hospitalized at Municipal Hospital Amasaman

07-08/2013 Antimycobacterial treatment with Rifampicin 600mg, Streptomycin 1000mg (54d)

08/2013 wound excision

#### Secondary diagnoses

08/2013 tremor on the right hand of unknown reason

### 4. Physical examination

*Body-Mass-Index (BMI)* 35,38 kg KG/ m<sup>2</sup>

*All systems normal*

*Pain assessment:* severe pain at wound and wound surrounding especially during dressing (7/10)

### 5. Current Medication

Diclofenac 50mg + Paracetamol 500 (1-0-0)  
Vitamin B complex  
Zincofer  
Erythromycin 500mg (2-2-2-2) against sec. bacterial wound infection



## 6. Laboratory

BU confirmation 06/2013 ZN+/- PCR- for *M. ulcerans*

## 7. Microbiology

Results of wound swabs in the period (06-11/2013)

*S. aureus*: sensitive to Ceftriaxone

*Pseudomonas aeruginosa*: sensitive to Amikacin, Gentamicin, Ceftriaxone, Tobramycin

8. Photo documentation: Ulcer distal left leg (shows dorsal side of the wound)

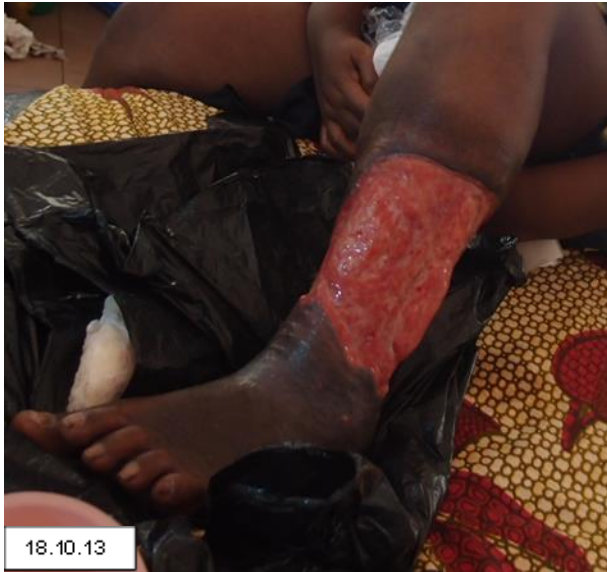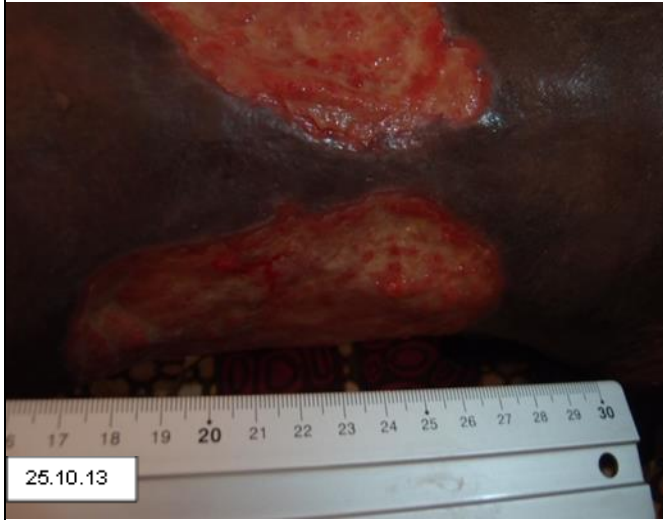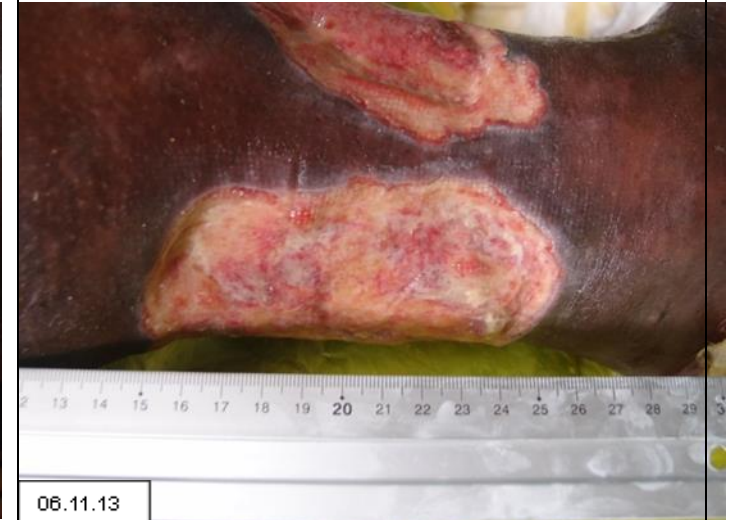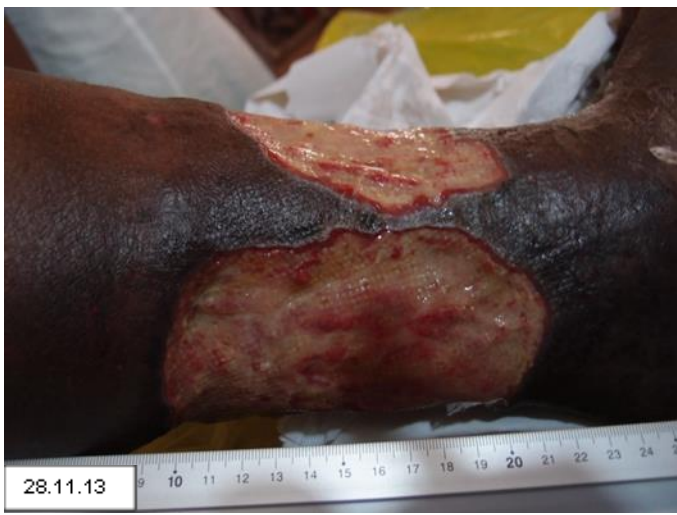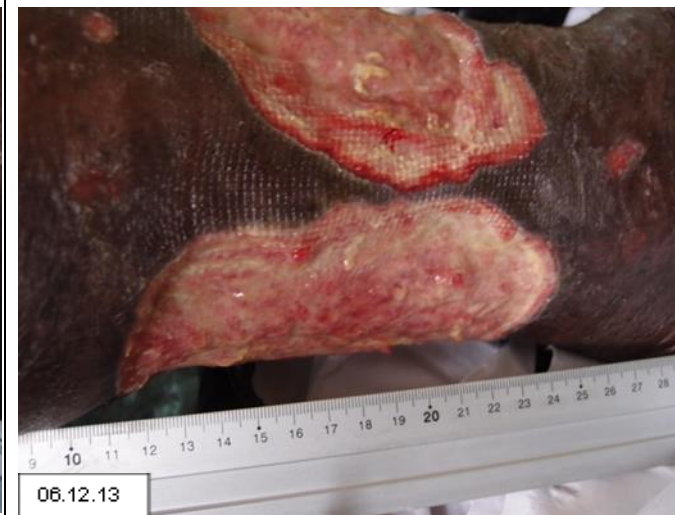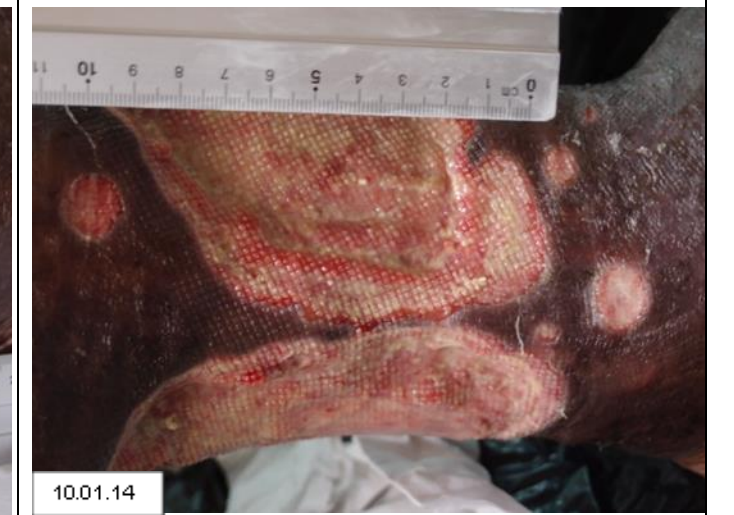

# Case Report AMH

## Chronic Buruli Ulcer Wounds

Patient No. 004

### 1. Demographic data

Sex: Female  
Age: 38 years

### 2. Wound description

BU Category III (see Photo documentation)

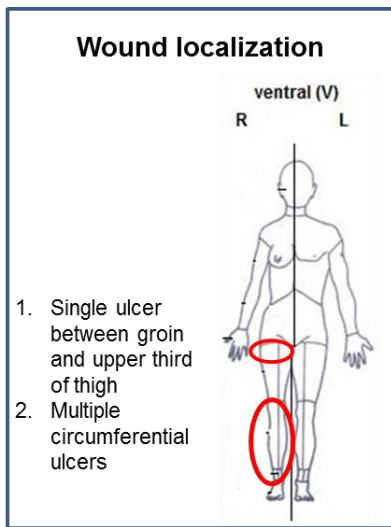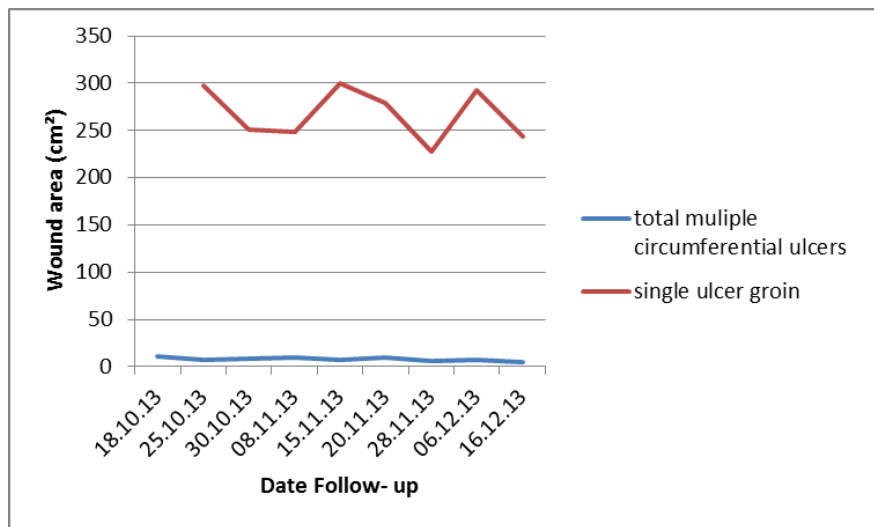

### 3. Medical History

#### Wound history

Wound observed since: both 03/2012

since 03/2013 hospitalized at Municipal Hospital Amasaman

03-05/2013 Antimycobacterial treatment  
06-07/2013 with Rifampicin 600mg,  
Streptomycin 1000mg (55+ 30d)  
08/2013 multiple wound excision

#### Secondary diagnoses

HIV positive since several years

### 4. Physical examination

Body-Mass-Index (BMI) 24,7 kg KG/ m<sup>2</sup>

All systems normal

Pain assessment: moderate till severe pain on the whole leg (4-7/10)

### 5. Current Medication

Antiretroviral treatment: Tenofovir/ Lamivudine 300mg, Nevirapine USP 200mg (2-0-1)  
Cotrimoxazole (1-0-0)  
Multivitamines  
Zincofer

## 6. Laboratory

BU confirmation: 06/2013 ZN+/ PCR+ for *M. ulcerans*

| Date                   | 21.08.13  | 05.11.13  |
|------------------------|-----------|-----------|
| Hb [12-16g/dl]         |           | 8,6 g/dl  |
| HCT [37-51%]           |           | 29,6%     |
| RBC [4,2- 6,3M/ul]     |           | 4,02 M/ul |
| MCV [80-97fl]          |           | 73,6 fl   |
| MCH [26-32 pg]         |           | 21,4 pg   |
| MCHC<br>[31-36 g/dl]   |           | 29,1 g/dl |
| WBC<br>[4.1-10.9 K/ul] |           | 4,7 K/ul  |
| PLT<br>[140-440 K/ul]  |           | 194 K/ul  |
| CD4                    | 185/182   |           |
| CD3                    | 1332/1308 |           |

## 7. Microbiology

Results of wound swabs

*Pseudomonas aeruginosa*: sensitive to Amikacin, Gentamicin, Ceftriaxone, Tobramycin

8. Photo documentation

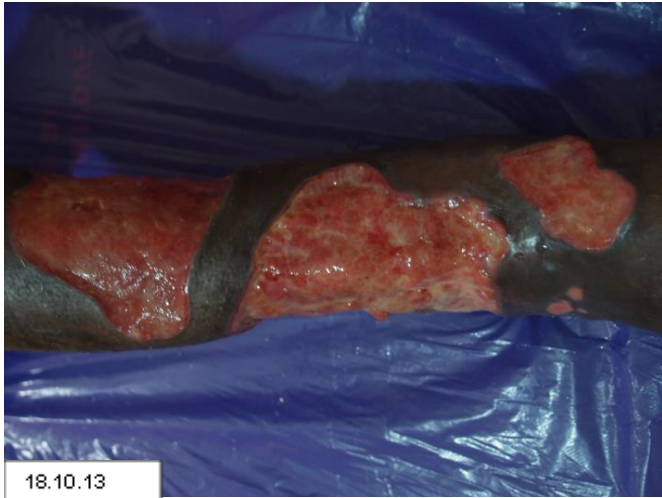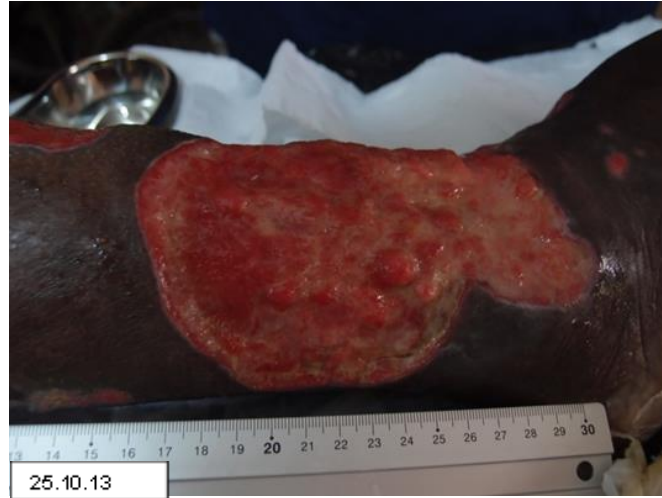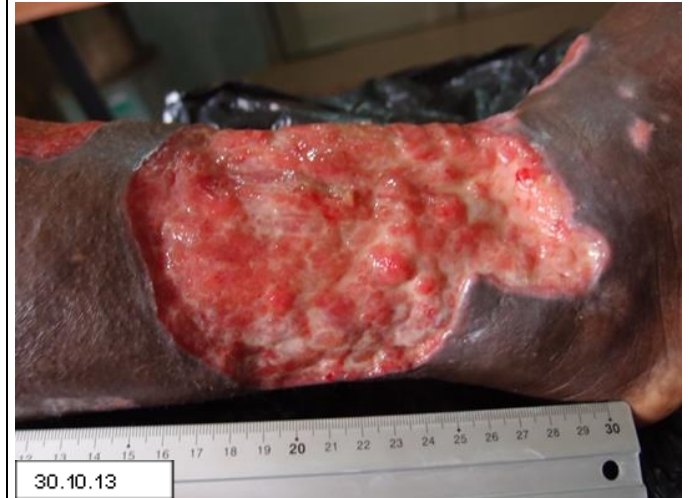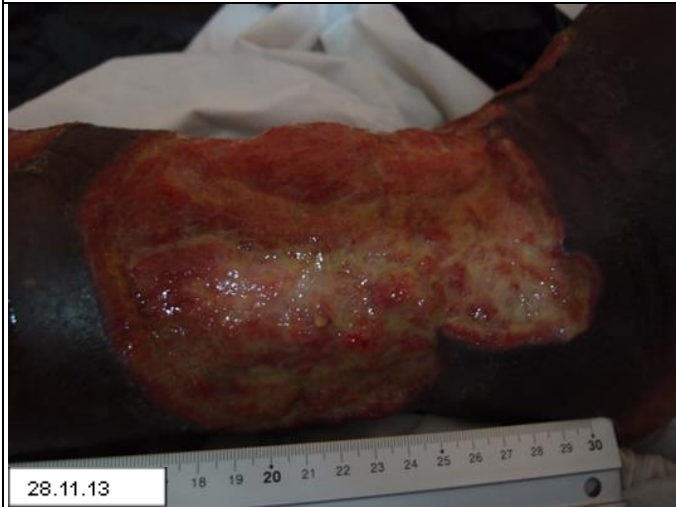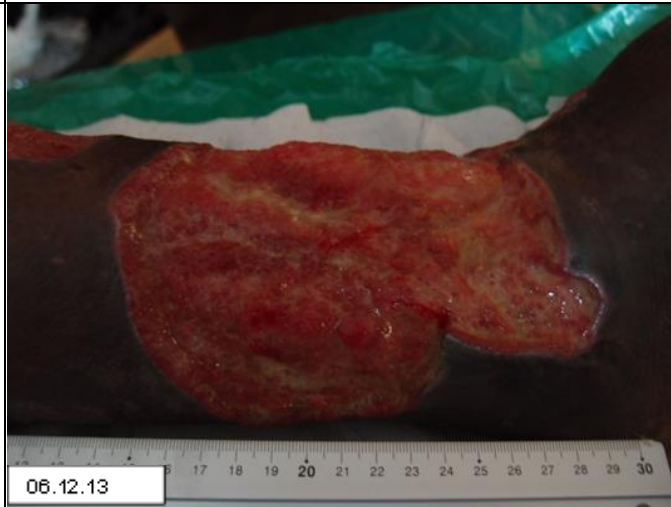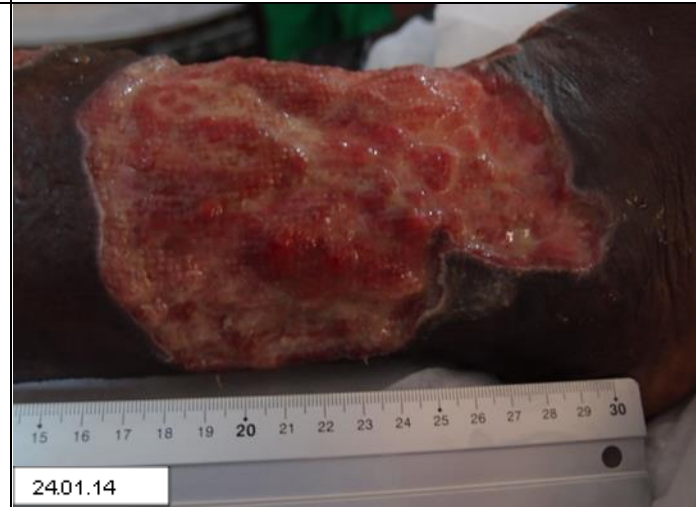

## Case Report AMH

### Healed Buruli Ulcer Wounds

Patient No. 005

#### 1. Demographic data

Sex: Male  
Age: 45 years

#### 2. Wound description

BU Category III (see Photo documentation)

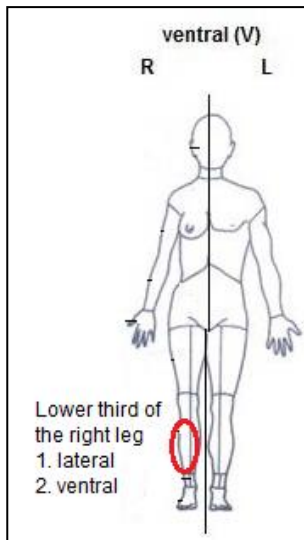

#### 3. Medical History

##### Wound history

Wound observed since: 06/2012

since 05/06/13 hospitalized at Municipal Hospital Amasaman

23/3- 12/5/13 Antimycobacterial treatment with Rifampicin 600mg, Streptomycin 1000mg (55+ 30d)

08/11/2013 split skin grafting

##### Secondary diagnoses

Diabetes mellitus

#### 4. Physical examination

Body-Mass-Index (BMI) 33.6 kg KG/ m<sup>2</sup>

All systems normal

#### 5. Current Medication

Metformin 1000mg

#### 6. Laboratory

BU confirmation: ZN (-) PCR (+) for *M. ulcerans*

**7. Photo documentation: Ulcer right leg, lateral**

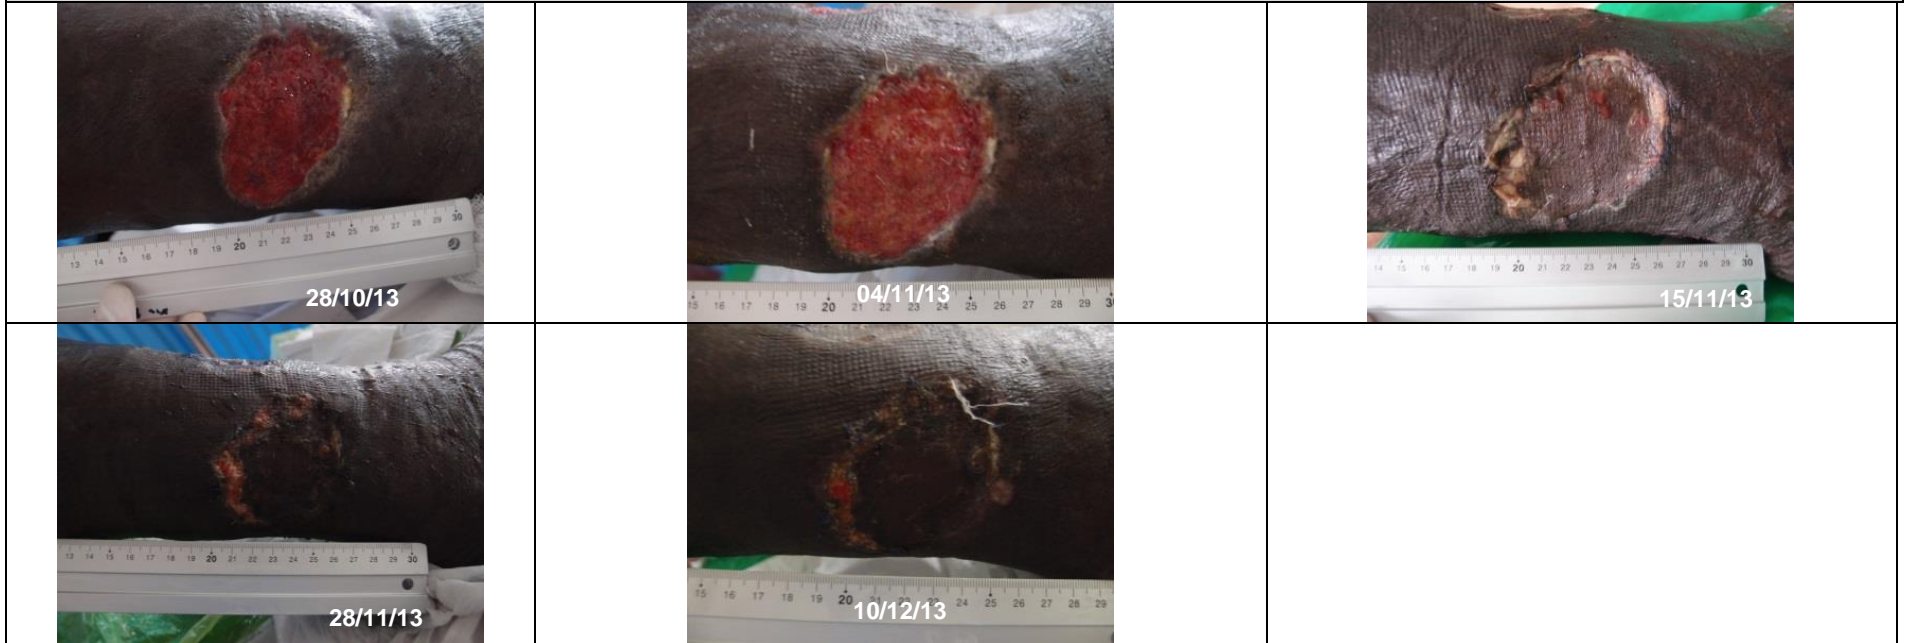

**Ulcer right leg, ventral**

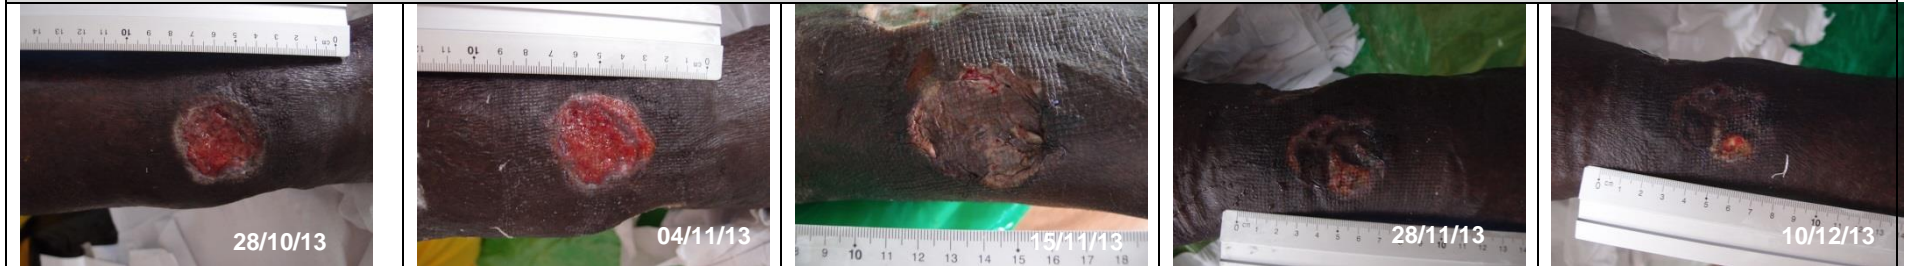

## Case Report AMH

### Healed Buruli Ulcer Wounds

Patient No. 006

#### 1. Demographic data

Sex: Male  
Age: 55 years

#### 2. Wound description

BU Category III (see Photo documentation)

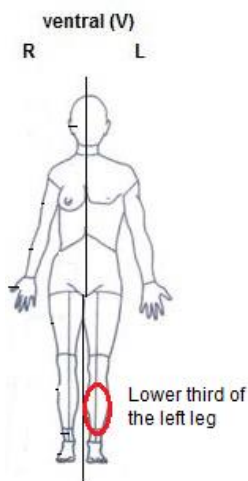

#### 3. Medical History

##### Wound history

Wound observed since: 2011

since 03/06/2013 hospitalized at Municipal Hospital Amasaman

08/11/2013 wound excision and SSG

##### Secondary diagnoses

Varicose veins

#### 4. Physical examination

Body-Mass-Index (BMI) 22.96 kg KG/ m<sup>2</sup>

All systems normal

#### 5. Current Medication

Streptomycin 1000mg, Rifampicin 600mg. 56 doses taken

#### 6. Laboratory

BU confirmation: ZN (-) / PCR (+) for *M. ulcerans*



**7. Photo documentation: Ulcer right leg, lateral**

|                                                                                                   |                                                                                                    |                                                                                                     |
|---------------------------------------------------------------------------------------------------|----------------------------------------------------------------------------------------------------|-----------------------------------------------------------------------------------------------------|
|  <p>21/10/13</p> |  <p>28/10/13</p> |  <p>15/11/13</p> |
|  <p>02/12/13</p> |  <p>16/12/13</p> |                                                                                                     |

## Case Report AMH

### Chronic Buruli Ulcer Wounds

Patient No. 007

#### 1. Demographic data

Sex: Male  
Age: 66 years

#### 2. Wound description

BU Category II (see Photo documentation)

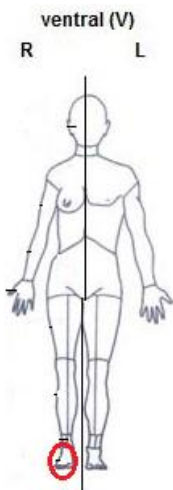

#### 3. Medical History

##### Wound history

Wound observed since: 1 year

since 13/12/2012 hospitalized at Municipal  
Hospital Amasaman

05- 07/2013 Antimycobacterial treatment with  
Rifampicin 600mg, Streptomycin 1000mg  
(56 doses taken)  
multiple wound excision

##### Secondary diagnoses

Hypertension

#### 4. Physical examination

*Body-Mass-Index (BMI) 22.23 kg KG/ m<sup>2</sup>*

*All systems normal*

#### 5. Current Medication

Zincofeer  
Amlodipine 10mg (1x1)

#### 6. Laboratory

BU confirmation: ZN (-) / PCR (+) for *M. ulcerans*

**7. Photo documentation**

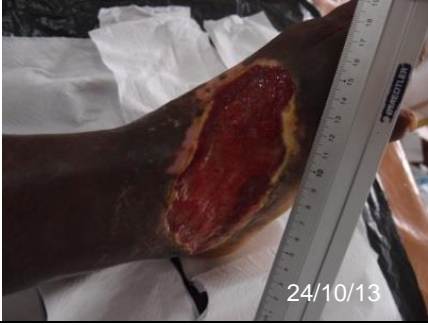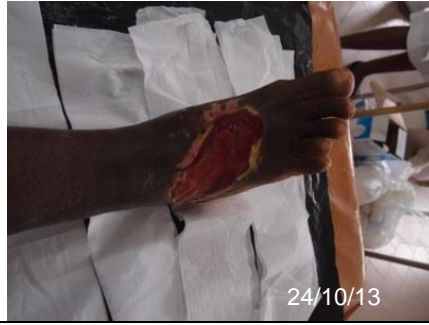

## Case Report AMH

### Chronic Buruli Ulcer Wounds

Patient No. 008

#### 1. Demographic data

Sex: Male  
Age: 7 years

#### 2. Wound description

BU Category III (see Photo documentation)

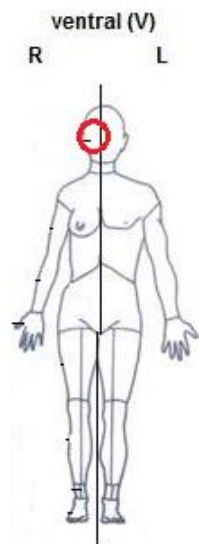

#### 3. Medical History

##### Wound history

Wound observed since: 1 year

since 09/07/2013 hospitalized at Municipal  
Hospital Amasaman

10/07-02/09/2013 Antimycobacterial treatment  
with Rifampicin 300mg,  
Streptomycin 500mg

##### Secondary diagnoses

Asthma

#### 4. Physical examination

Body-Mass-Index (BMI) 13.89 kg KG/ m<sup>2</sup>

All systems normal

#### 5. Laboratory

BU confirmation: ZN (-) / PCR (+) for *M. ulcerans*

6. Photo documentation

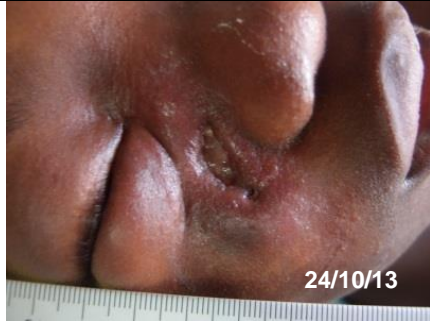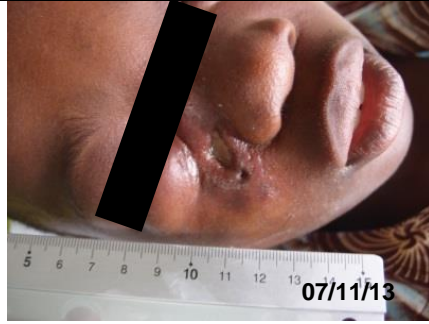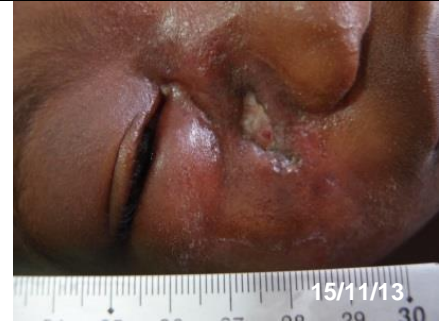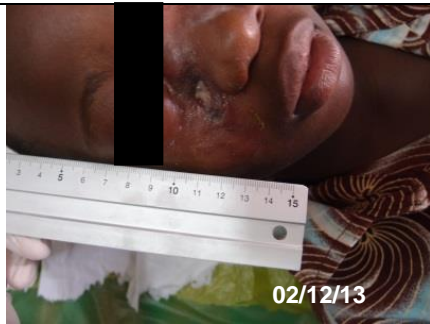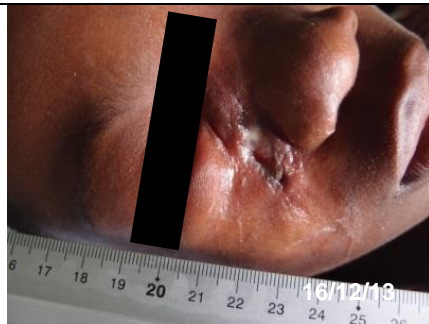

# Case Report AMH

## Chronic Buruli Ulcer Wounds

Patient No. 009

### 1. Demographic data

Sex: Male  
Age: 28 years

### 2. Wound description

BU Category III (see Photo documentation)

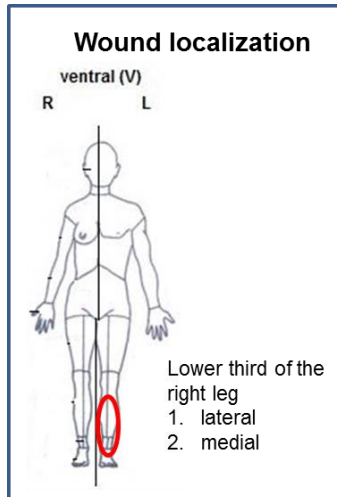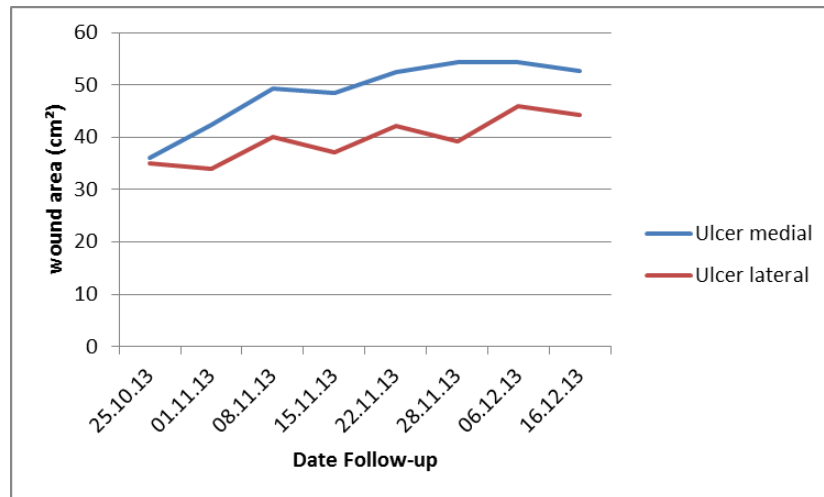

### 3. Medical History

#### Wound history

Wound observed since: medial: around 2004  
lateral: around 2005

since 09/2009 hospitalized at Municipal Hospital Amasamam

09-11/2009 Antimycobacterial treatment with Rifampicin 600mg, Streptomycin 1000mg (56d)

01//2010 1. split skin grafting on both sides

11/2010 2. split skin grafting on both sides

07/2012 wound debridement

11/2012 3. split skin grafting on both sides

12/2013 Wound biopsy for histopathology

**Result:** ulcerated skin with infiltration of the dermis by mixed inflammatory infiltrates mainly of neutrophils, lymphocytes and plasma cells. Prominent capillaries seen. No AFB's or fungal organism seen, no malignancy seen.

12/2013 discharge of hospital, attending as outpatient

#### Secondary diagnoses

Arterial hypertension (according to medical history)

### 4. Physical examination

Body-Mass-Index (BMI) 19,59 kg KG/ m<sup>2</sup>

All systems normal

Pain assessment: severe pain at wound and wound surrounding (7/10) especially during the night

## 5. Current Medication

No medication

## 6. Laboratory

No PCR results available

|                    |                 |
|--------------------|-----------------|
| <b>Date</b>        | <b>17.12.12</b> |
| Hb [12-16g/dl]     | 10,7 g/dl       |
| HCT [37-51]        |                 |
| RBC [4,2- 6,3M/ul] |                 |
| MCV [80-97fl]      |                 |
| MCH [26-32 pg]     |                 |
| MCHC [31-36 g/dl]  |                 |

## 7. Microbiology

No microbiological results available

8. Photo documentation: Ulcer left leg, medial malleolus

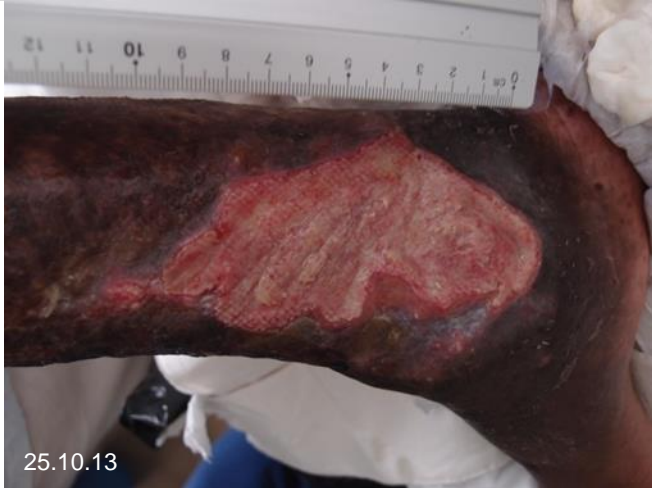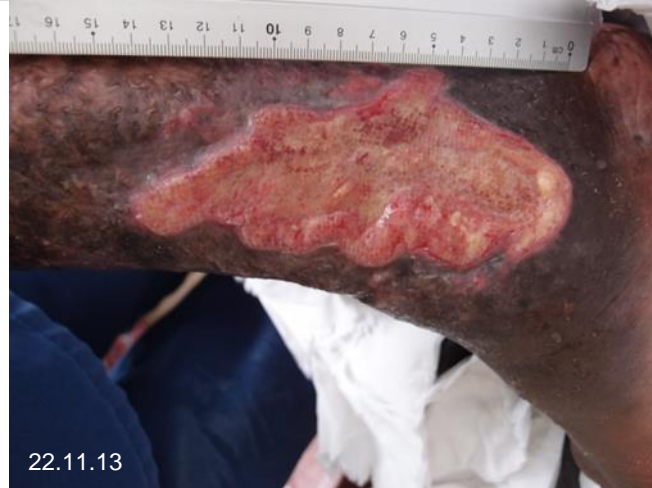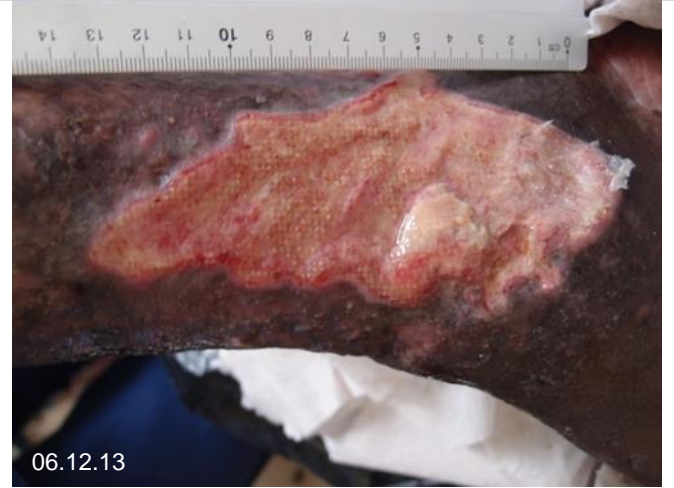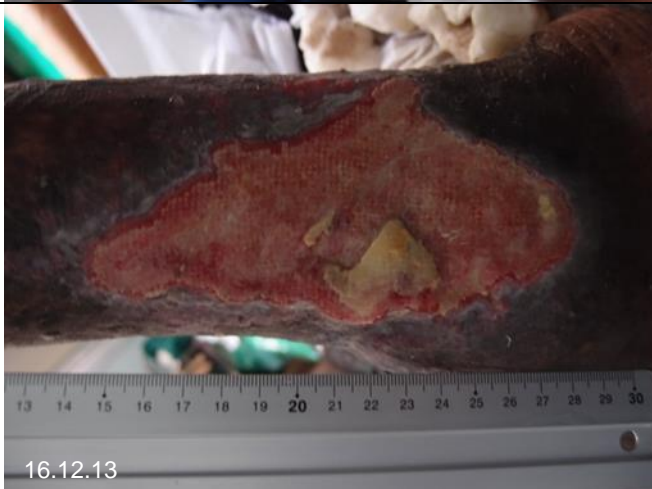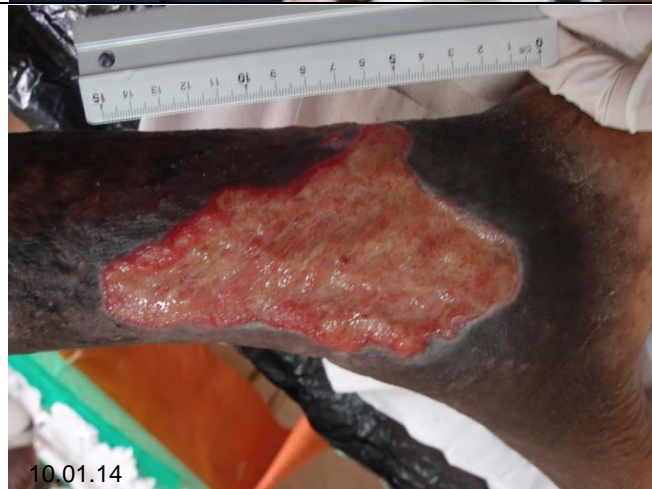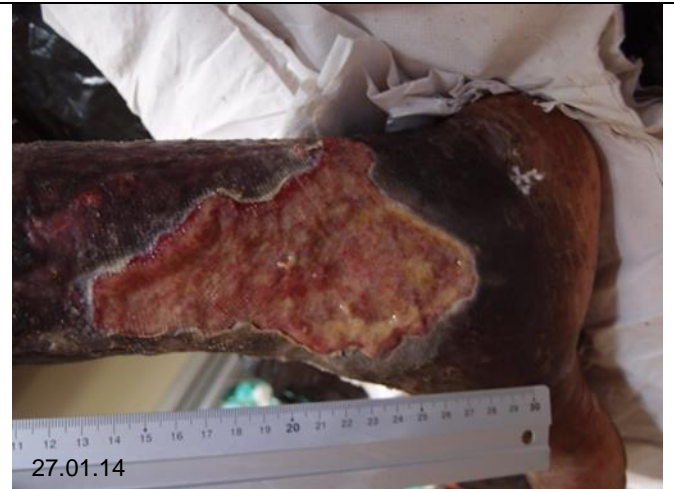



9. Photo documentation: Ulcer left leg, lateral malleolus

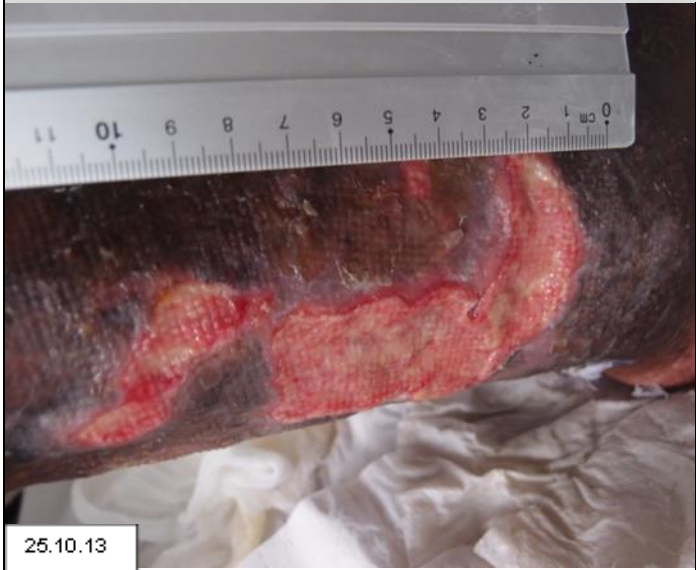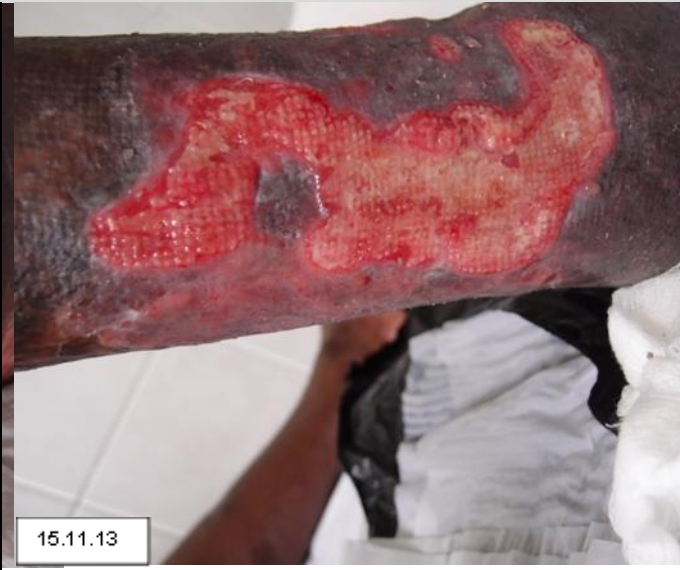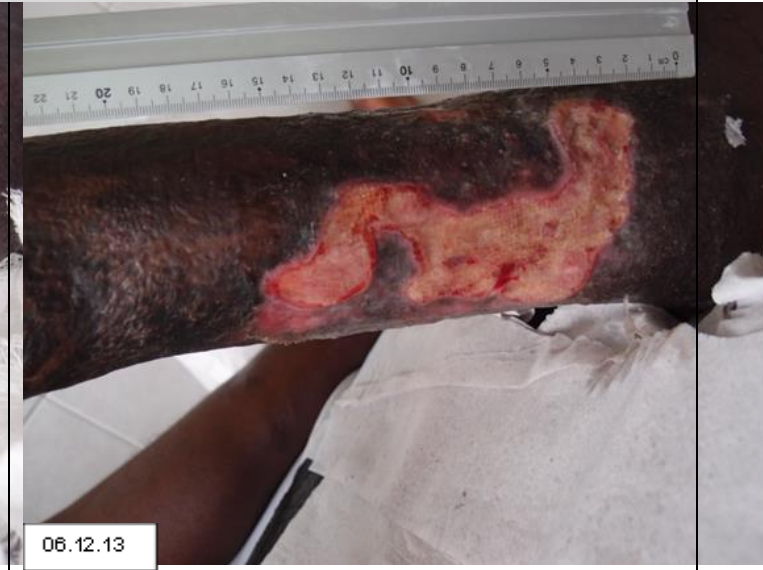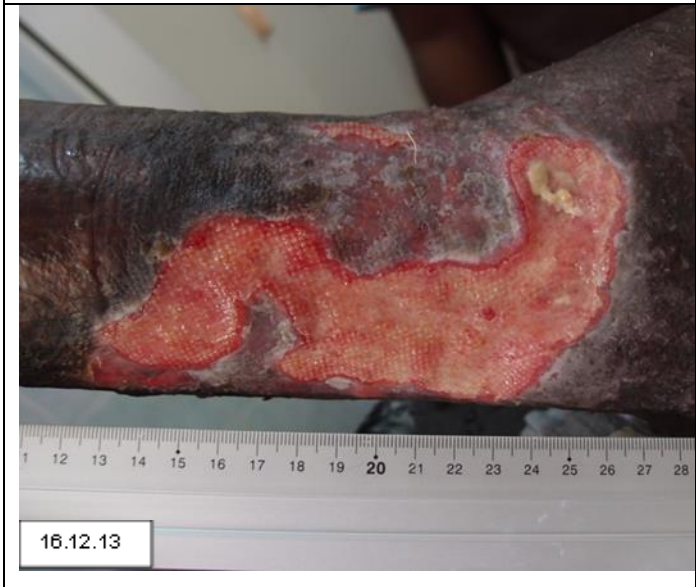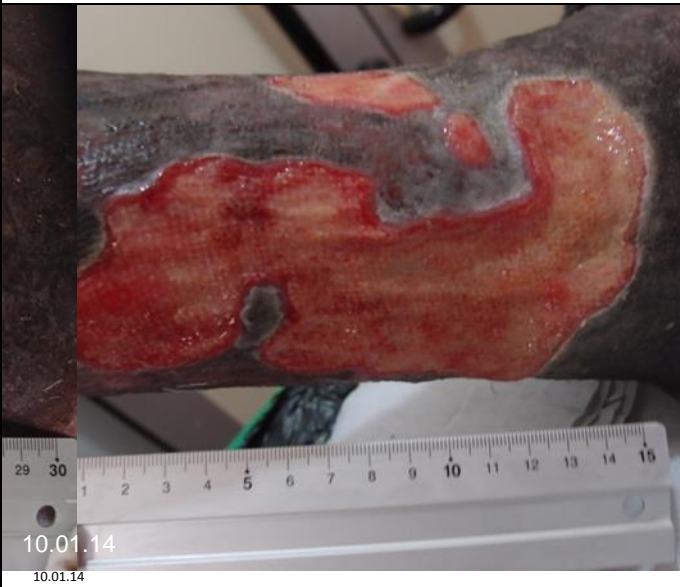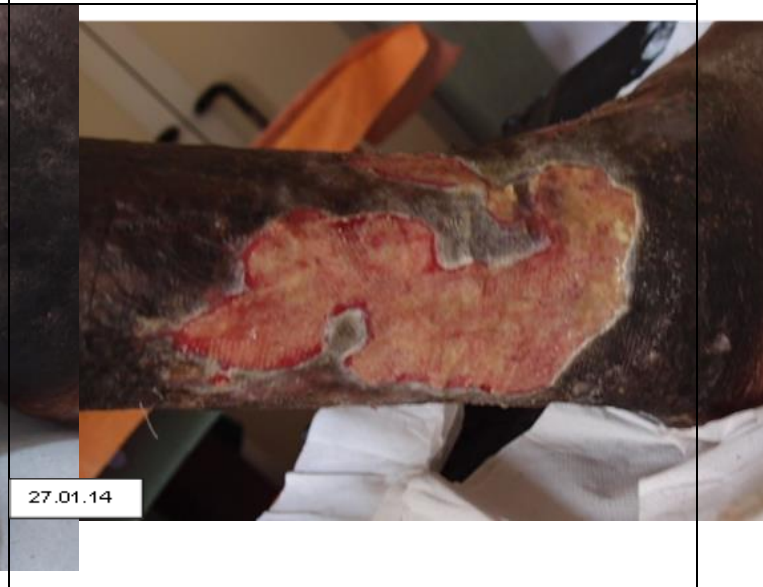

## Case Report AMH

### Chronic Buruli Ulcer Wounds

Patient No. 010

#### 1. Demographic data

Sex: Male  
Age: 31 years

#### 2. Wound description

BU Category III (see Photo documentation)

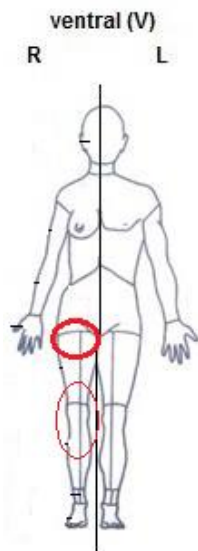

#### 3. Medical History

##### Wound history

Wound observed since: 13 years

since 08/07/2013 hospitalized at Municipal  
Hospital Amasaman

05/2013 Amputation lower leg  
Diagnosis: squamous cell carcinoma

12/2013 Patient died

##### Secondary diagnoses

Epilepsy

#### 4. Physical examination

*Body-Mass-Index (BMI)* 19.81 kg KG/ m<sup>2</sup>

*All systems normal*

#### 5. Current Medication

Streptomycin 1000mg, Rifampicin 600mg. 56 doses taken

#### 6. Laboratory

BU confirmation: ZN(-) / PCR(+) for *M. ulcerans*

**7. Photo documentation**

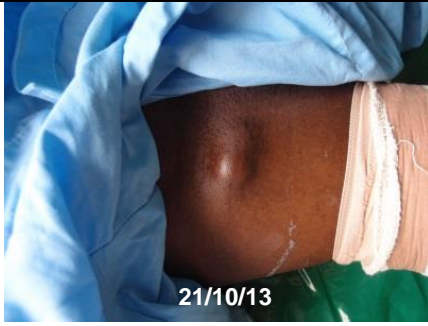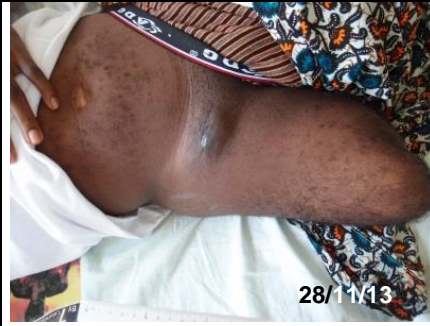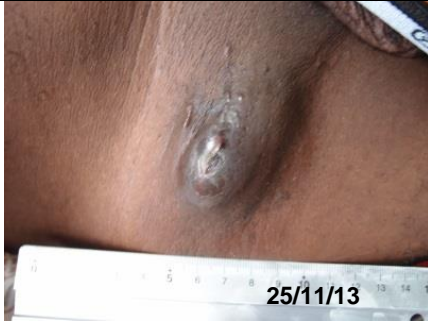

# Case Report AMH

## Chronic Buruli Ulcer Wounds

Patient No. 011

### 1. Demographic data

Sex: Male  
Age: 52 years

### 2. Wound description

BU Category III (see Photo documentation)

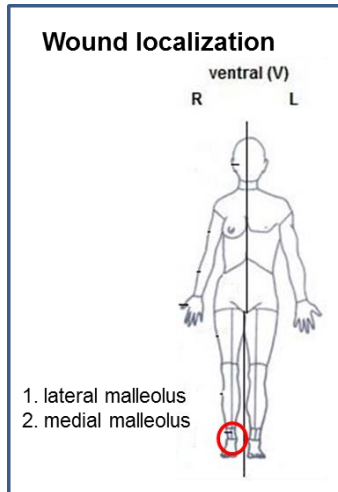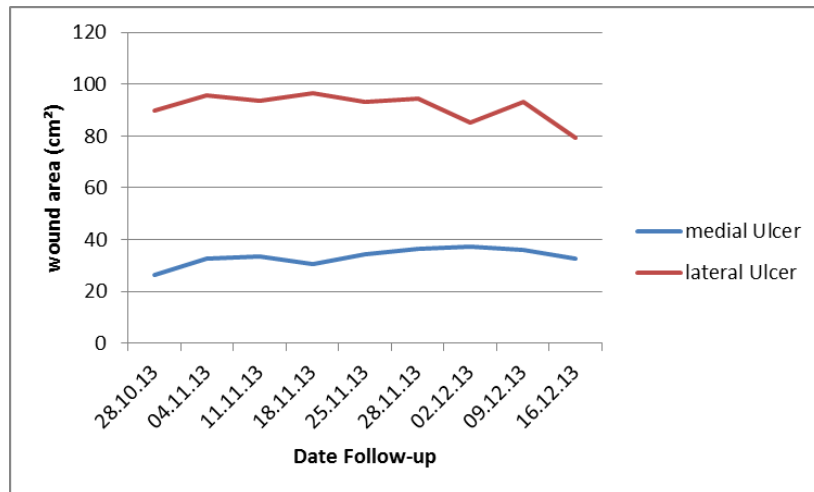

### 3. Medical History

#### Wound history:

Wound observed since: medial: 2008  
lateral: 2009

since 05/2011 hospitalized at Municipal Hospital Amasaman

05-07/2011 Antimycobacterial treatment with Rifampicin 600 mg, Streptomycin 1000 mg (57d)

09-10/2011 Antimycobacterial treatment with Rifampicin 600 mg, Streptomycin 1000 mg (28d)

12/2011 wound excision on both sides

01/2012 biopsy ulcer for histopathology  
Result: chronic non-specific ulcer

11/2012 wound debridement both sides

11/2012 split-skin grafting both sides

12/2013 biopsy ulcer for histopathology  
No results available

12/2014 discharge of hospital attending as outpatient

#### Secondary diagnoses

since several years mild hear impairment

07/2011 arterial hypertension

11/2013 Gastritis, *Helicobacter pylori* triple therapy

### 4. Physical examination

Body-Mass-Index (BMI) 27,13 kg KG/ m<sup>2</sup>

All systems normal

Pain assessment: severe pain at wound and wound surrounding (7-8/10) especially in the evening and during the night

## 5. Current Medication

Zinc and Vitamin supplements  
Bendroflumethiazide 2,5 mg (1-0-0)

## 6. Laboratory

BU confirmation: 05/2011 ZN+/ PCR- for *M. ulcerans*

|                |          |
|----------------|----------|
| Date           | 30.05.12 |
| Hb [12-16g/dl] | 8,4 g/dl |

## 7. Microbiology

Results of wound swabs (2011-2013)

*Proteus mirabilis*: sensitive to Cefuroxime

Koagulase neg. staphylococci: sensitive to Amikacin

8. Photo documentation: Ulcer right leg, lateral malleolus

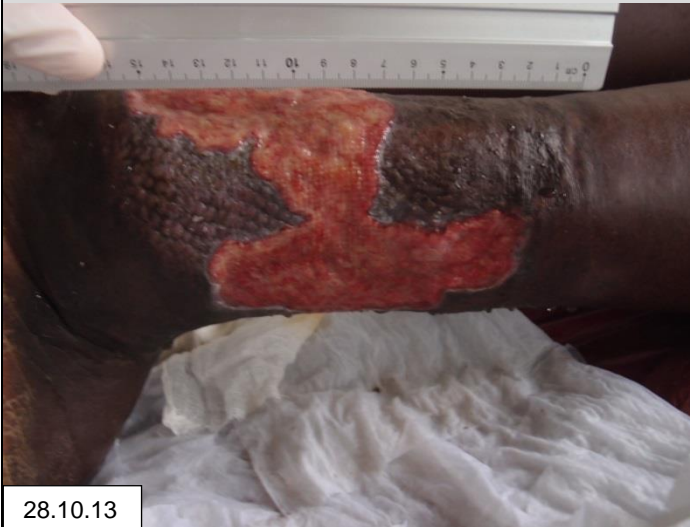

28.10.13

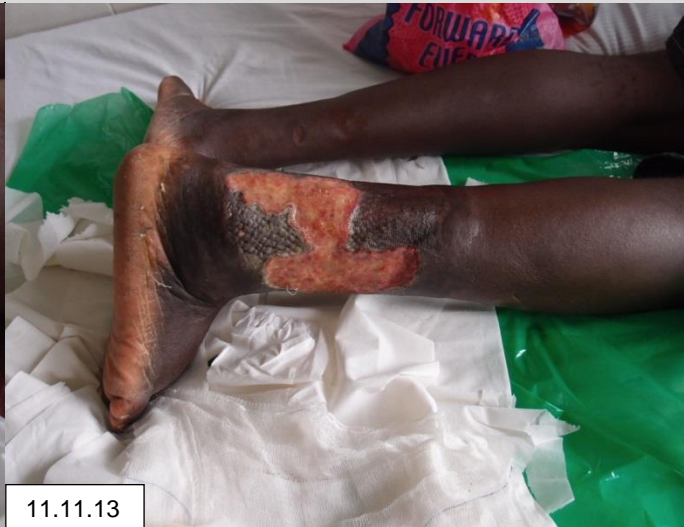

11.11.13

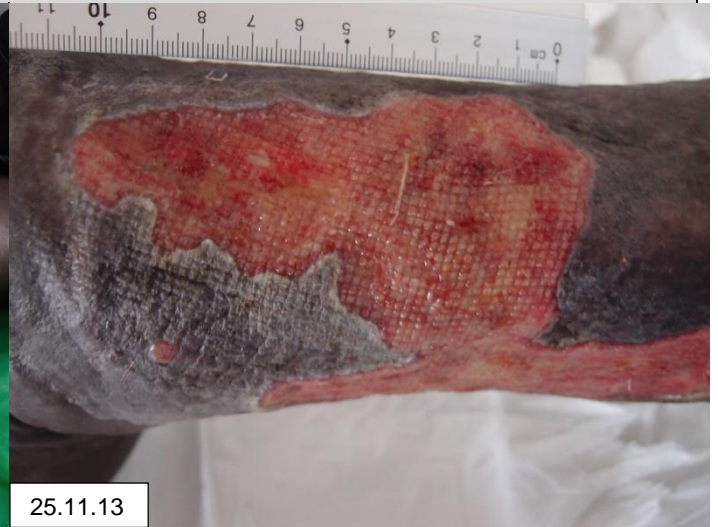

25.11.13

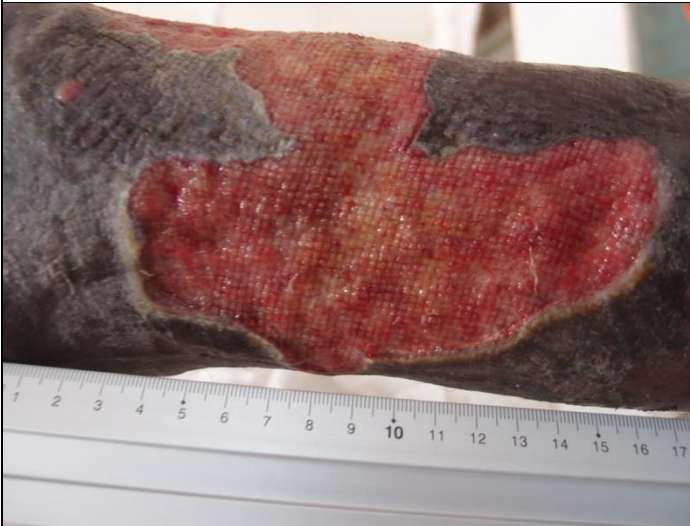

09.12.13

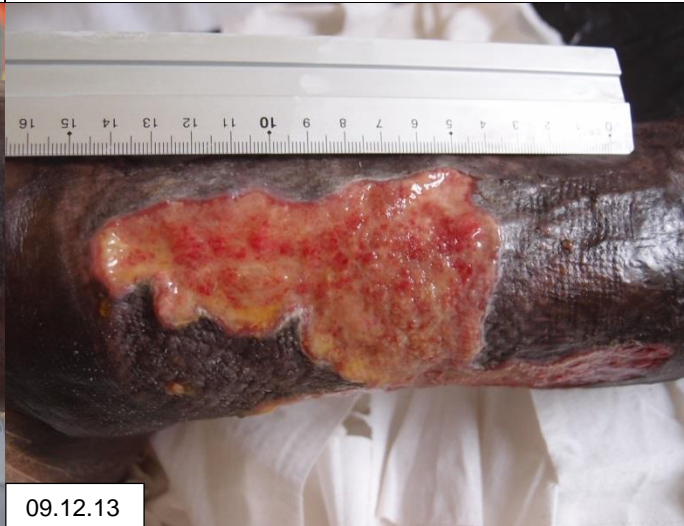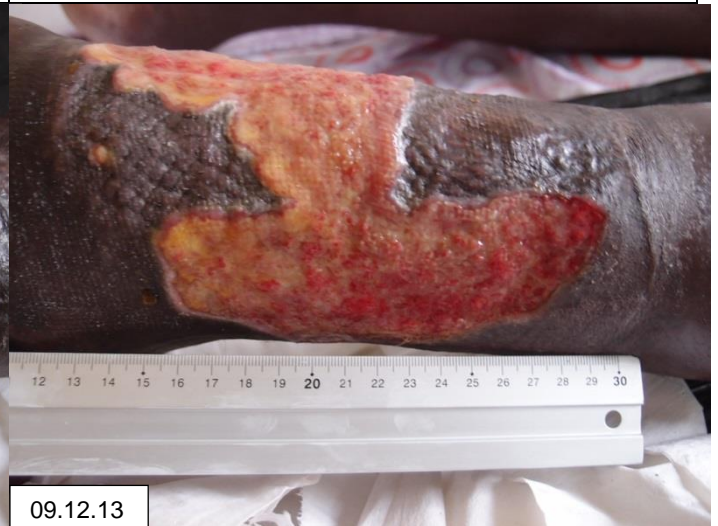

09.12.13

**9. Photo documentation: Ulcer right leg, medial malleolus**

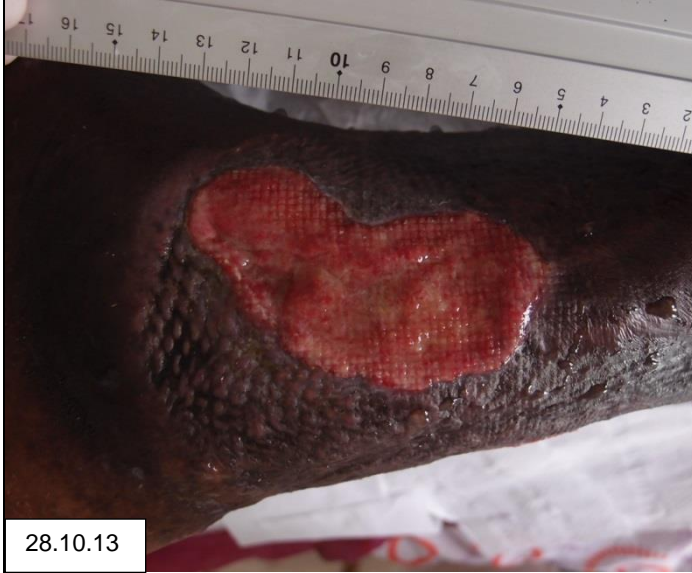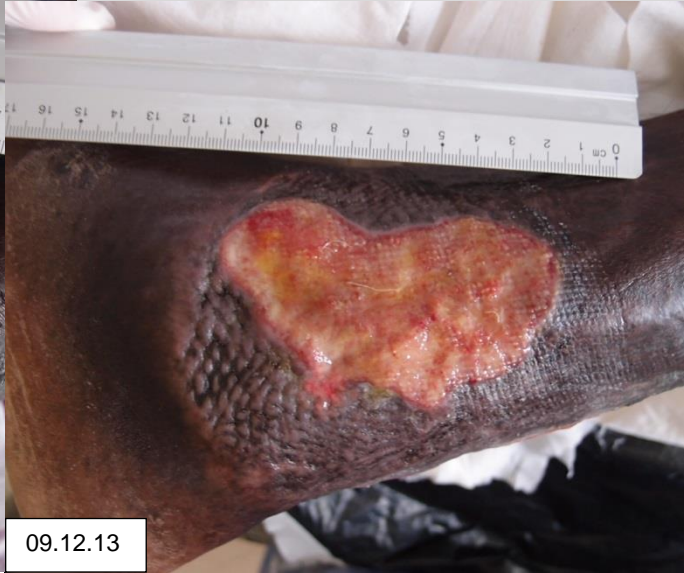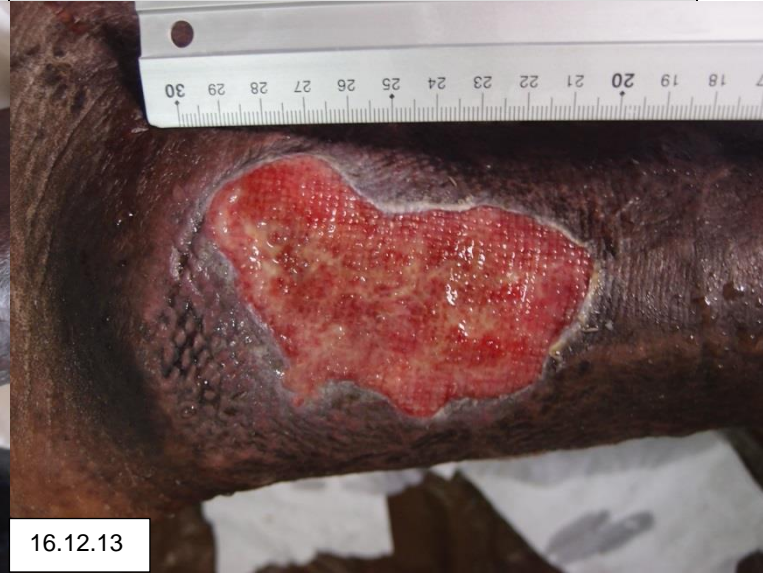

## Case Report AMH

### Healed Buruli Ulcer Wounds

Patient No. 012

#### 1. Demographic data

Sex: Male  
Age: 27 years

#### 2. Wound description

BU Category III (see Photo documentation)

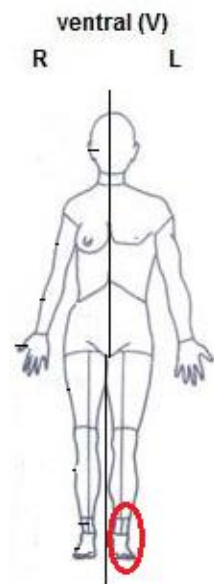

#### 3. Medical History

Nil of significance

##### Wound history

Wound observed since: 10 years

since 27/08/2013 hospitalized at Municipal  
Hospital Amasaman

08/2013 Split- skin grafting

#### 4. Physical examination

*Body-Mass-Index (BMI) 18.51kg KG/ m<sup>2</sup>*

*All systems normal*

#### 5. Current Medication

Streptomycin 1000mg, Rifampicin 600mg. 56 doses taken

#### 6. Laboratory

BU confirmation: ZN(-) / PCR(+) for *M. ulcerans*



**7. Photo documentation**

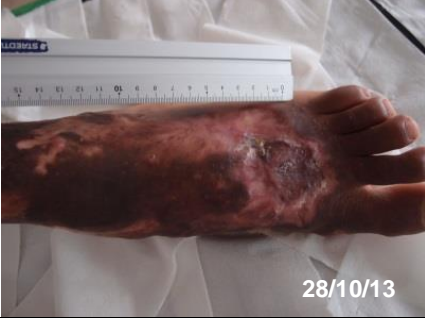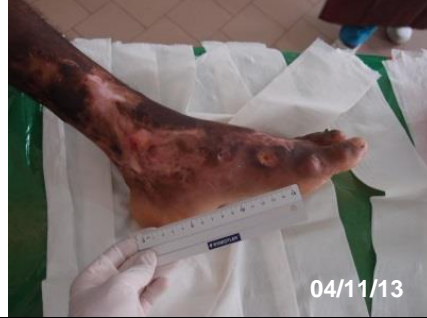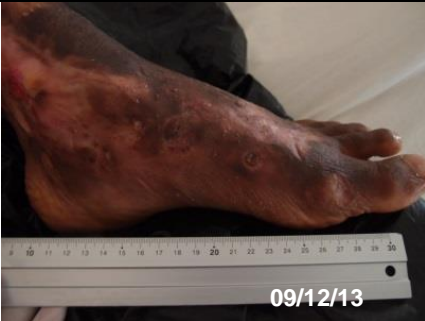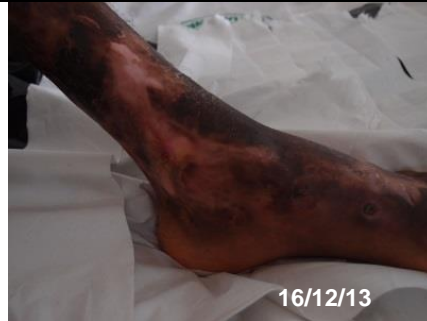

## Case Report AMH

### Chronic Buruli Ulcer Wounds

Patient No. 013

#### 1. Demographic data

Sex: Male  
Age: 19 years

#### 2. Wound description

BU Category III (see Photo documentation)

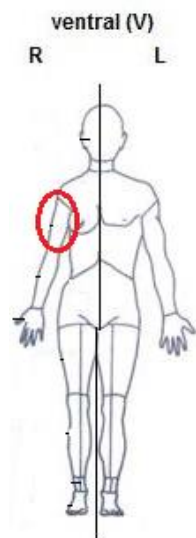

14.11.13

X- ray;

**Diagnosis:**

chronic  
osteomyelitis

#### 3. Medical History

Nil of significance

Wound history

Wound observed since: 2011

since 02/09/2013 hospitalized at Municipal  
Hospital Amasaman

08-10/2013 Antimycobacterial treatment  
with Rifampicin 600mg,  
Streptomycin 1000mg

11/2013 Chronic osteomyelitis

Patient referred to tertiary care hospital

#### 4. Physical examination

*Body-Mass-Index (BMI) 16.79 kg KG/ m<sup>2</sup>*

*All systems normal*

#### 5. Laboratory

BU confirmation: ZN(+) / PCR(+) for *M. ulcerans*

**6. Photo documentation**

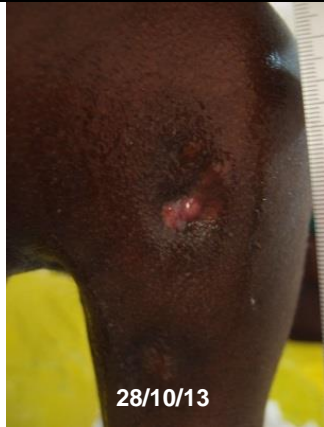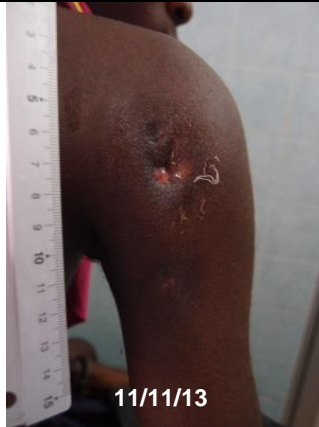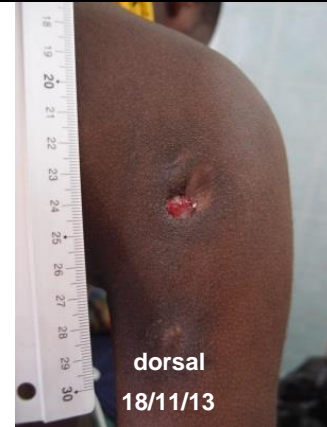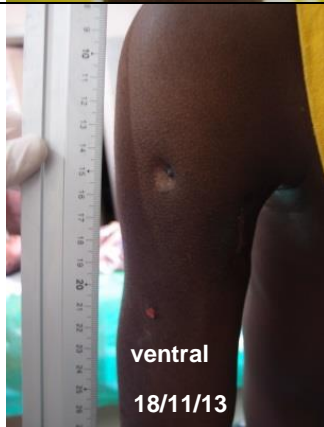

## Case Report AMH

### Healed Buruli Ulcer Wounds

Patient No. 014

#### 1. Demographic data

Sex: Male  
Age: 8 years

#### 2. Wound description

BU Category III (see Photo documentation)

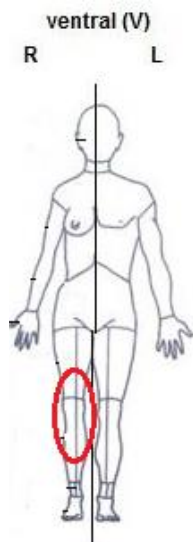

#### 3. Medical History

Nil of significance

##### Wound history

Wound observed since: 2010

since 07/02/2013 hospitalized at Municipal  
Hospital Amasaman

Complication: knee joint contraction

#### 4. Physical examination

*Body-Mass-Index (BMI) 14,72 kg KG/ m<sup>2</sup>*

*All systems normal*

#### 5. Current Medication

Streptomycin 500mg, Rifampicin 300mg. 56 doses taken

#### 6. Laboratory

BU confirmation: ZN (-) / PCR (+) for *M. ulcerans*

**7. Photo documentation**

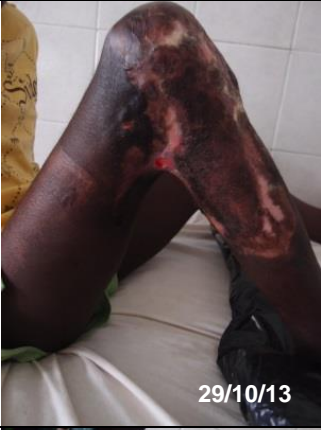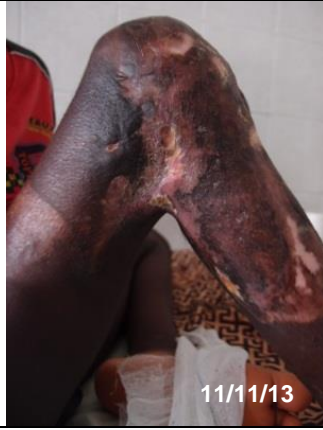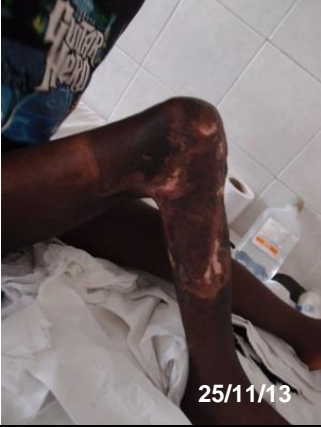

## Case Report AMH

### Chronic Buruli Ulcer Wounds

Patient No. 015

#### 1. Demographic data

Sex: Male  
Age: 8 years

#### 2. Wound description

BU Category III (see Photo documentation)

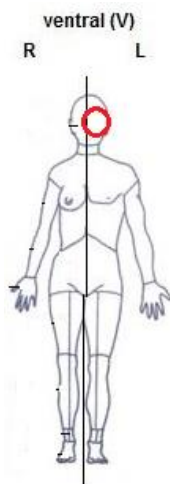

#### 3. Medical History

Nil of significance

##### Wound history

Wound observed since: 2011

Since 15/05/2103 hospitalized at Municipal Hospital Amasaman

05-07/2013 Antimycobacterial treatment with Rifampicin 300mg, Streptomycin 500mg (56d)

12/2013 diagnosed bone necrosis, referred to hospital of tertiary health care

#### 4. Physical examination

*Body-Mass-Index (BMI) 13.02 kg KG/ m<sup>2</sup>*

*All systems normal*

#### 5. Current Medication

Folic acid  
Multivitamin

#### 6. Laboratory

BU confirmation: ZN(+) / PCR(+) for *M. ulcerans*

1. Photo documentation

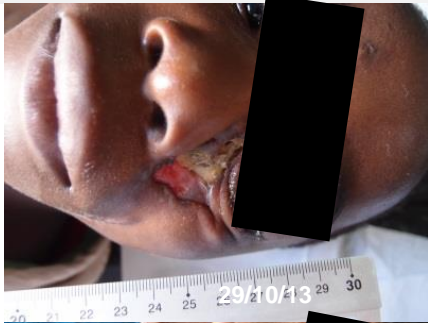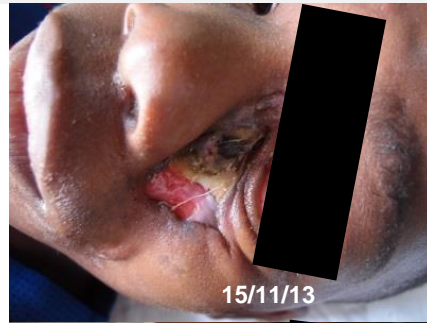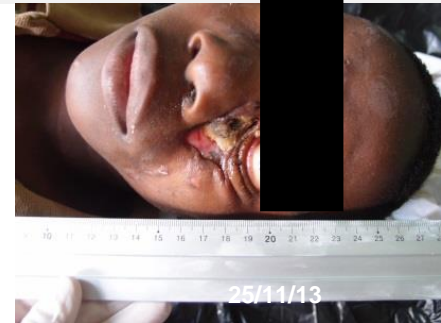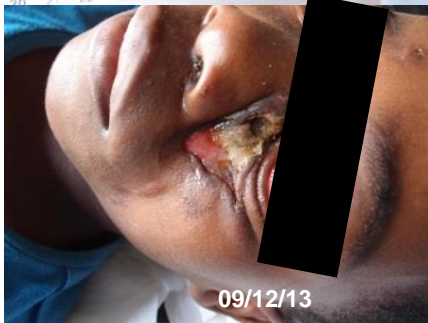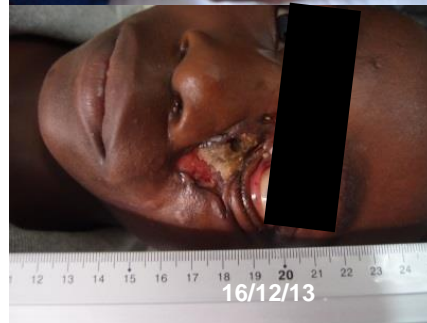

## Case Report AMH

### Healed Buruli Ulcer Wounds

Patient No. 016

#### 1. Demographic data

Sex: Female  
Age: 25 years

#### 2. Wound description

BU Category I (see Photo documentation)

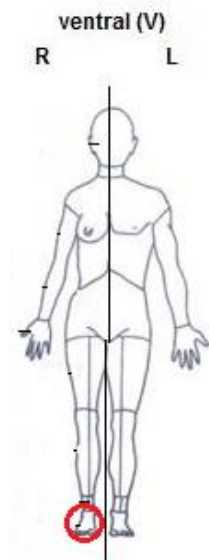

#### 3. Medical History

Nil of significance

##### Wound history

Wound observed since: 10/2012

since 17/07/2013 hospitalized at Municipal  
Hospital Amasaman

08/11/2013 wound excision

12/2013 split skin grafting

01/2014 wound healed

#### 4. Physical examination

Body-Mass-Index (BMI) 23.01 kg KG/ m<sup>2</sup>

All systems normal

#### 5. Current Medication

Streptomycin 1000mg, Rifampicin 600mg. 56 doses taken

#### 6. Laboratory

BU confirmation: ZN(+) / PCR(+) for *M. ulcerans*



7. Photo documentation

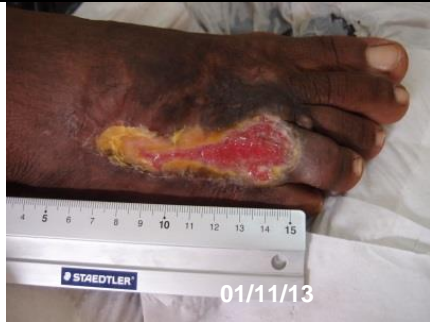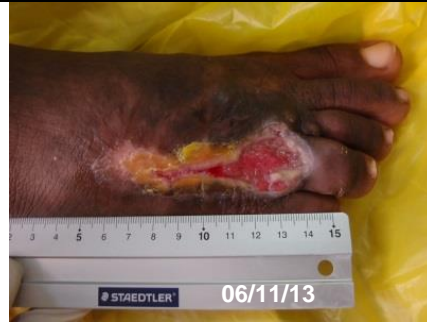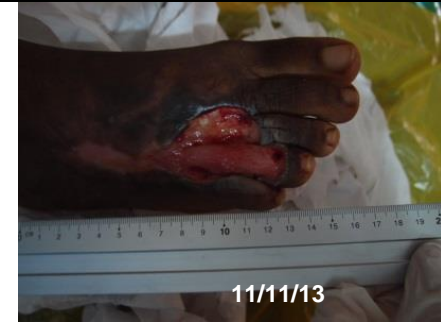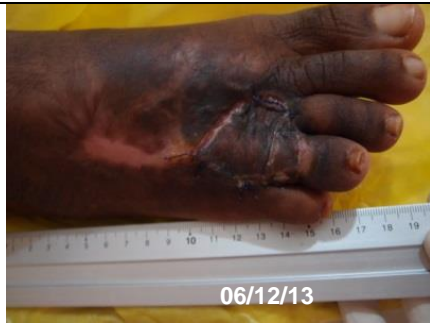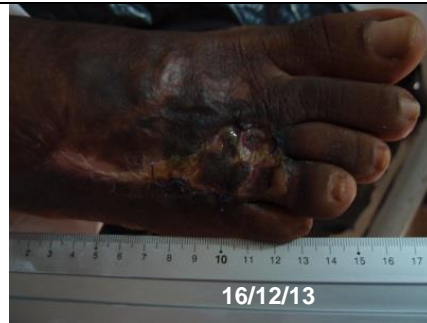

## Case Report AMH

### **Chronic Buruli Ulcer Wounds**

Patient No. 017

#### 1. Demographic data

Sex: Female  
Age: 73 years

#### 2. Wound description

BU Category III (see Photo documentation)

ventral (V)

R L

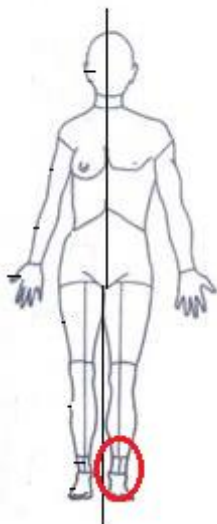

#### 3. Medical History

##### Wound history

Wound observed since: 3 years

since 28/08/2013 hospitalized at Municipal  
Hospital Amasaman

29/08- 23/10/2013 Antimycobacterial treatment  
with Rifampicin 600mg,  
Streptomycin 1000mg (56d)

##### Secondary diagnoses

Hypertension

#### 4. Physical examination

*All systems normal*

#### 5. Current Medication

Zinkofer

#### 6. Laboratory

BU confirmation: ZN (-) / PCR (+) for *M. ulcerans*

**7. Photo documentation**

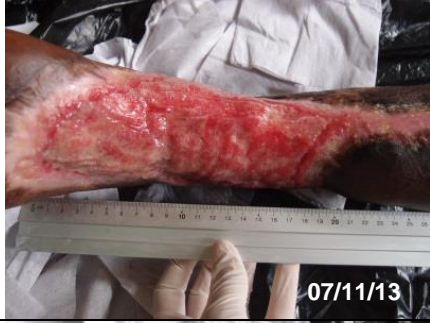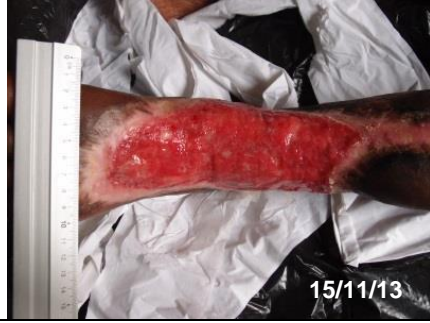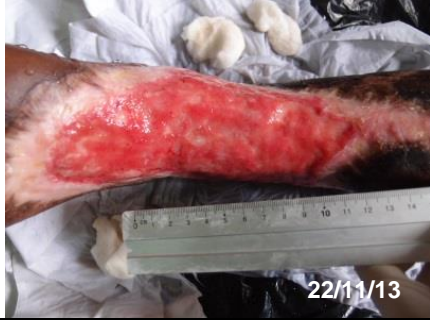

## Case Report AMH

### *Healed Buruli Ulcer Wounds*

Patient No. 018

#### 1. Demographic data

Sex: Female  
Age: 72 years

#### 2. Wound description

BU Category I (see Photo documentation)

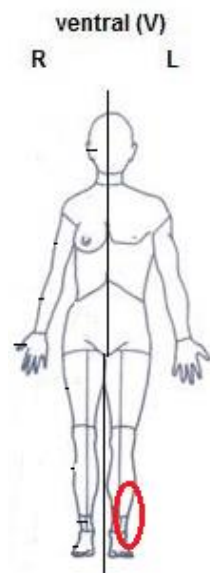

#### 3. Medical History

##### Wound history

Wound observed since: 8 months

since 06/11/2013 treated as outpatient at Municipal  
Hospital Amasaman

11-12/2013 Antimycobacterial treatment with Rifampicin  
600mg, Streptomycin 1000mg (56d)

01/2014 wound excision

##### Secondary diagnoses

Asthma

#### 4. Physical examination

*Body-Mass-Index (BMI)* 42.06 kg KG/ m<sup>2</sup>

*All systems normal*

#### 5. Current Medication

Amlodipine 5mg (1x1), Vitamin B complex  
Salbutamol, Prednisolon 5mg

#### 6. Laboratory

BU confirmation: ZN(+) / PCR(+) for *M. ulcerans*

**7. Photo documentation**

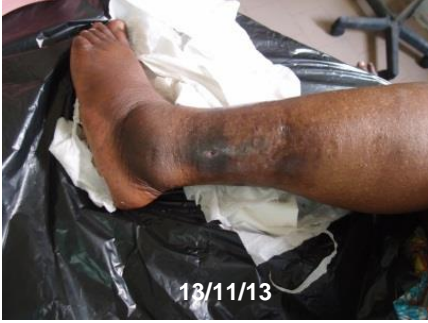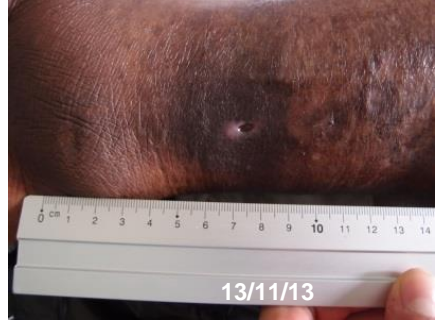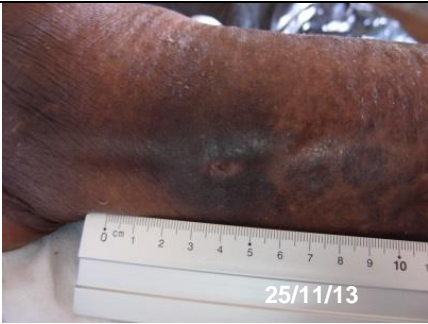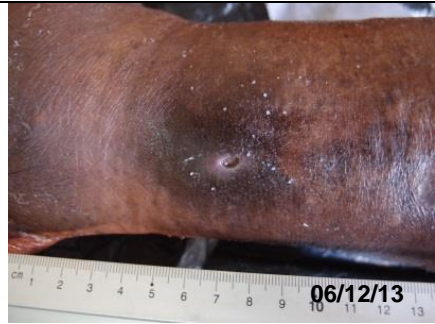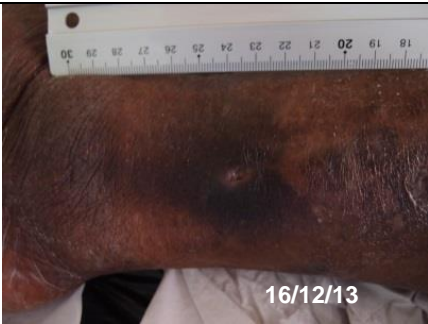

## Case Report AMH

### **Chronic Buruli Ulcer Wounds**

Patient No. 019

#### 1. Demographic data

Sex: Female  
Age: 45 years

#### 2. Wound description

BU Category III (see Photo documentation)

ventral (V)

R L

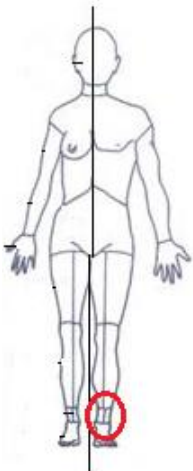

#### 3. Medical History

Nil of significance

##### Wound history

Wound observed since: 2010

since 25/11/2013 hospitalized at Municipal  
Hospital Amasaman

11-12/2013 Antimycobacterial treatment  
with Rifampicin 600mg,  
Streptomycin 1000mg (56d)

#### 4. Physical examination

*All systems normal*

#### 5. Current Medication

Vitamin B complex

#### 6. Laboratory

BU confirmation: ZN (-) / PCR (+) for *M. ulcerans*

## 7. Laboratory

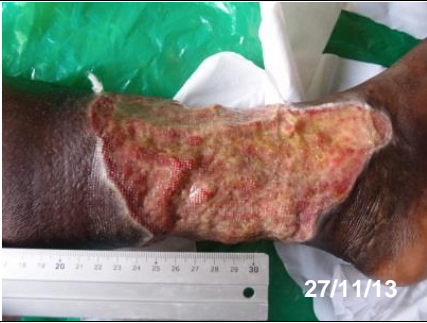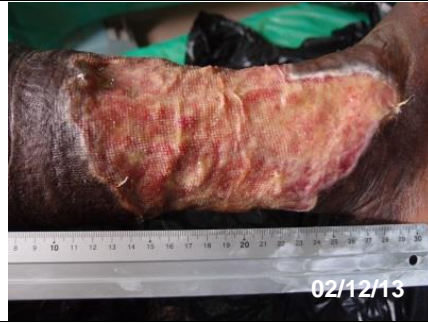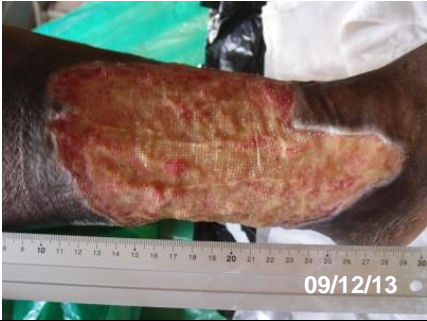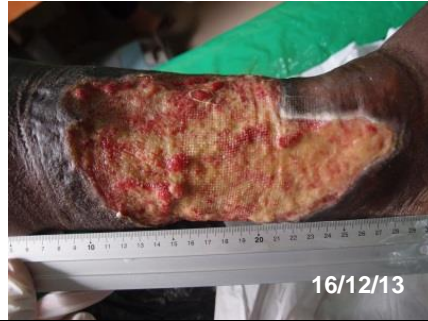

## Case Report AMH

### Chronic Buruli Ulcer Wounds

Patient No. 020

#### 1. Demographic data

Sex: Male  
Age: 69 years

#### 2. Wound description

BU Category III (see Photo documentation)

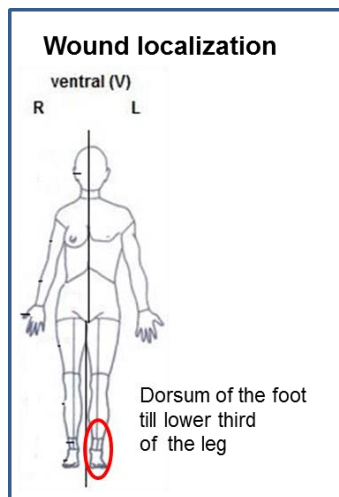

#### 3. Medical History

##### Wound History

Wound observed since: 07/ 2013

since 09/2013 consultation as an outpatient at the Municipal Hospital Amasaman

10-11/2013 Antimycobacterial treatment with Rifampicin 600 mg, Streptomycin 1000 mg (56d)

##### Secondary diagnoses

No further diseases known

#### 4. Physical examination

*Cardiovascular system:* normal, no signs of varicose

*All systems normal*

*Pain assessment:* Severe pain at wound in the left leg (7-8/10), unable to walk

#### 5. Current Medication

Diclofenac



## 6. Laboratory

BU confirmation:

09/2013 ZN- / PCR- for *M. ulcerans*

10/2013 ZN-/ PCR+ for *M. ulcerans*

## 7. Microbiology

Results of wound swabs

09/2013 mixed culture report (pus cells, G+ rods, G- cocci. G- rods), suspected to be infected

11/2013 *Pseudomonas fluorescense/putida* (Interpretation of bacterial load: infected)

01/2014 presence of numerous maggots in the wound

8. Photo documentation: Ulcer left leg, lateral malleolus

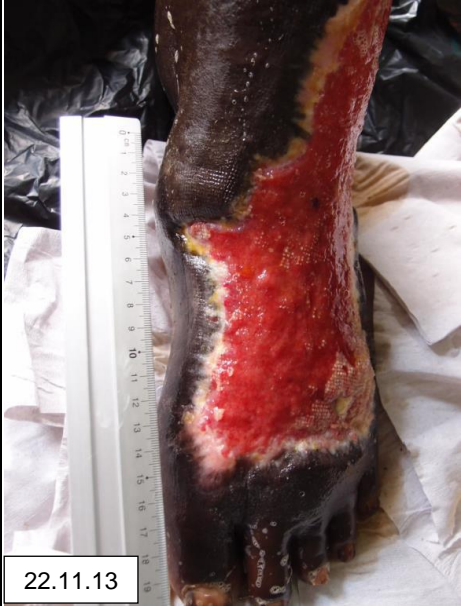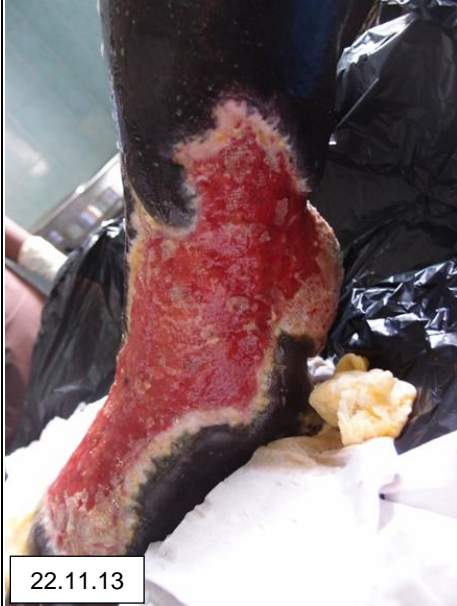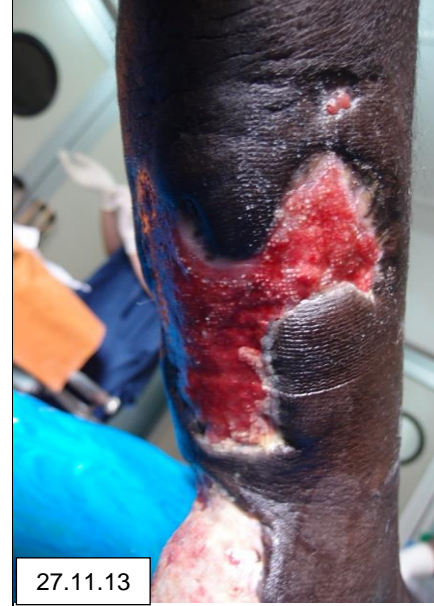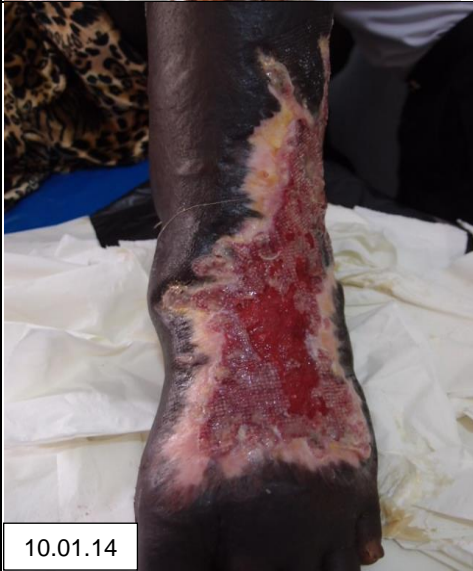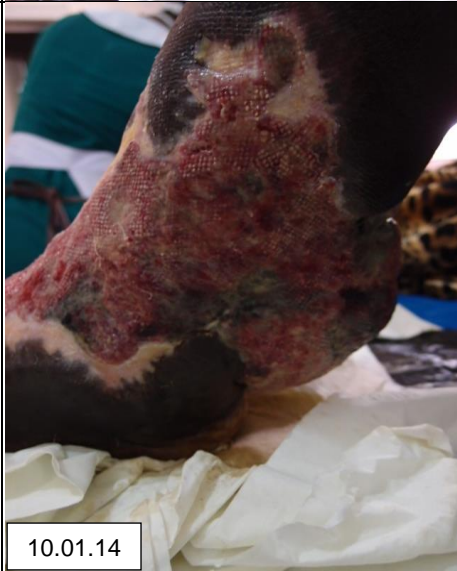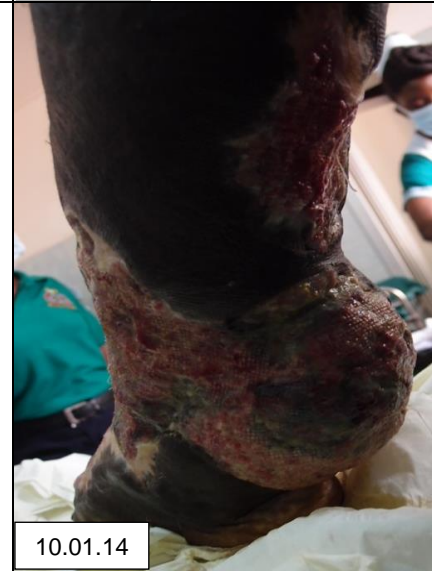

## Case Report AMH

### Chronic Buruli Ulcer Wounds

Patient No. 021

#### 1. Demographic data

Sex: Male  
Age: 10 years

#### 2. Wound description

BU Category I (see Photo documentation)

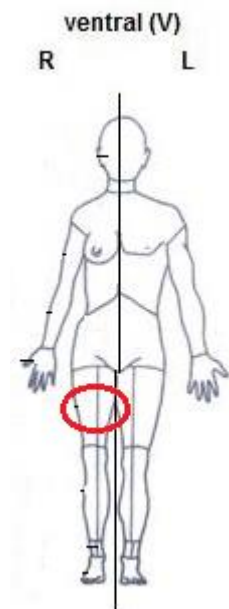

#### 3. Medical History

Nil of significance

##### Wound history

Wound observed since: 2 years

since 22/11/2013 hospitalized at Municipal  
Hospital Amasaman

#### 4. Physical examination

*Body-Mass-Index (BMI) 13.02 kg KG/ m<sup>2</sup>*

*All systems normal*

#### 5. Current Medication

Streptomycin 500mg, Rifampicin 300mg. 56 doses taken

#### 6. Laboratory

BU confirmation: ZN(+) / PCR(+) for *M. ulcerans*

**7. Photo documentation**

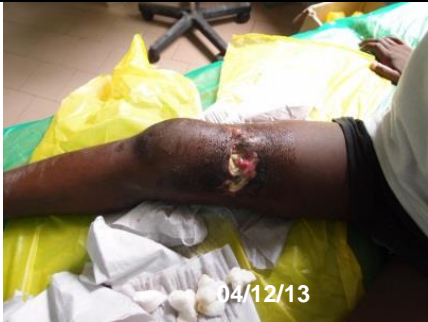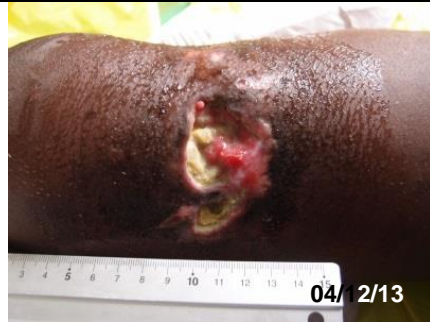

## Case Report AMH

### Chronic Buruli Ulcer Wounds

Patient No. 023

#### 1. Demographic data

Sex: Female  
Age: 22 years

#### 2. Wound description

BU Category III (see Photo documentation)

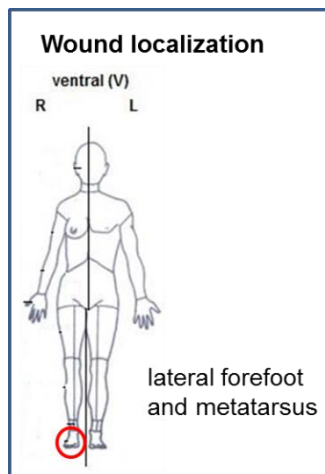

#### 3. Medical History

##### Wound history

repeated wounds at the same localization:  
2001-2004 (healed)  
01/2010- 03/2011 (healed)

current wound observed since: 02/2013

since 01/2011 consultation at the health post in Obom as an outpatient

01-03/2011 Antimycobacterial treatment with Rifampicin 600 mg, Streptomycin 1000 mg (58d)

since 02/2014 hospitalized at Municipal Hospital Amasaman

02/2014 wound biopsy for histopathology  
Result: well differentiated invasive squamous cell carcinoma

02/2014 chest X-ray: "lung fields looks normal"  
X-ray of foot: 3.5 digits and the metatarsals not present

#### 4. Physical examination

*Body-Mass-Index (BMI)* 16,73 kg KG/ m<sup>2</sup>

*Cardiovascular system:* normal, no signs of varicose

*Respiratory system:* normal, vesicular sound

*Abdomen:* soft, liver palpable with 2 cm below costal margin, no spleen palpable

*Pain assessment:* Constant, severe pain at wound and wound surrounding (7-9/10)

*Lymph nodes:* right and left inguinal lymph nodes palpable, not painful

*Skin/ sclera:* skin is very pale and the sclera is affected by jaundice

## 5. Current Medication

Diclofenac 50 mg tid  
Oral Tramadaol 50 mg tid  
Oral Fersolate 2x1  
Oral Vitamin C 100mg 2x1

## 6. Laboratory

01/2011 ZN+ PCR- for *M. ulcerans*

| Date                        | 18.12.2013  | 12.02.2014 |
|-----------------------------|-------------|------------|
| Hb [12-16g/dl]              | 6,1 g/dl    | 5,5 g/dl   |
| HCT [37-51]                 | 22,3%       | 17,9%      |
| RBC [4,2- 6,3M/ul]          | 2,87 M/ul   | 2,61 M/ul  |
| MCV [80-97fl]               | 77,7fl      | 68.6 fl    |
| MCH [26-32 pg]              | 21,3pg      | 21,1 pg    |
| MCHC [31-36 g/dl]           | 27,4 g/dl   | 30,7 g/dl  |
| WBC [4.1-10.9 K/ul]         | 11,9 K/ul   | 12,8 K/ul  |
| - Neutrophils [25-75%]      | 69,0%       | 64,5%      |
| - Lymphocytes[20-60%]       | 21,4%       | 34,4%      |
| - Monocytes [2-10%]         |             |            |
| - Eosinophils [1-6%]        |             |            |
| - Basophils [0-1%]          |             |            |
| PLT [140-440 K/ul]          | 628K/ul     | 673 K/ul   |
| Urea [2,1- 7,1 mmol/l]      | 1,2 mmol/l  |            |
| Creatinine [53- 106 umol/l] | 72,7 umol/l |            |
| Albumin [35-52 g/l]         | 26,7 g/dl   |            |
| T.Protein [60-78 g/l]       | 60,3g/dl    |            |
| T.Bilirubin [5-21 umol/l]   | 7,0 umol/l  |            |
| D.Bilirubin [<3,4 umol/l]   | 6,8 umol/l  |            |
| AST [<40 U/l]               | 4,5 U/l     |            |
| ALT [<40 U/l]               | 64,2 U/l    |            |
| Gamma Gt [6-24 U/l]         | 85,2 U/l    |            |
| ALKP [<240 U/l]             | 610,4 U/l   |            |

## 7. Microbiology

Results of wound swabs

30.10.2013 *Proteus mirabilis*: sensitive to Amikacin, Cefuroxime, Ceftriaxone, Ampicillin,

10. Photo documentation: Ulcer right foot

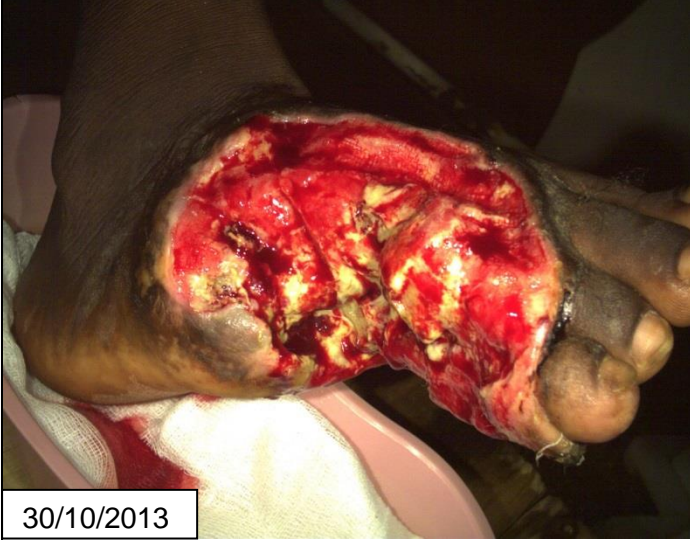

30/10/2013

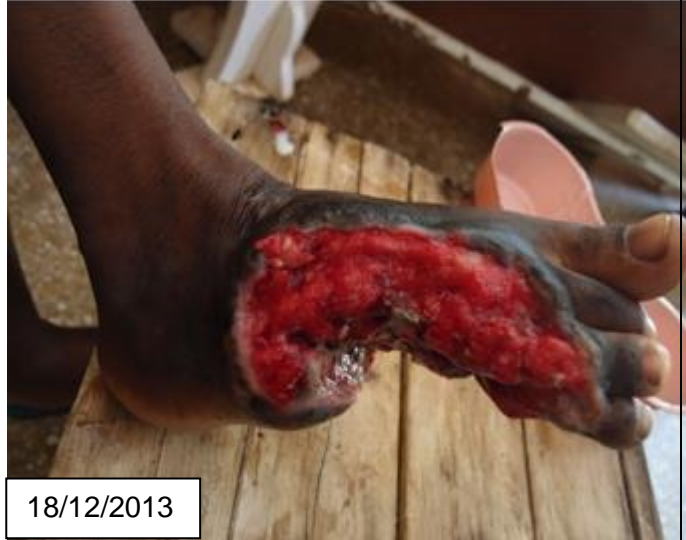

18/12/2013

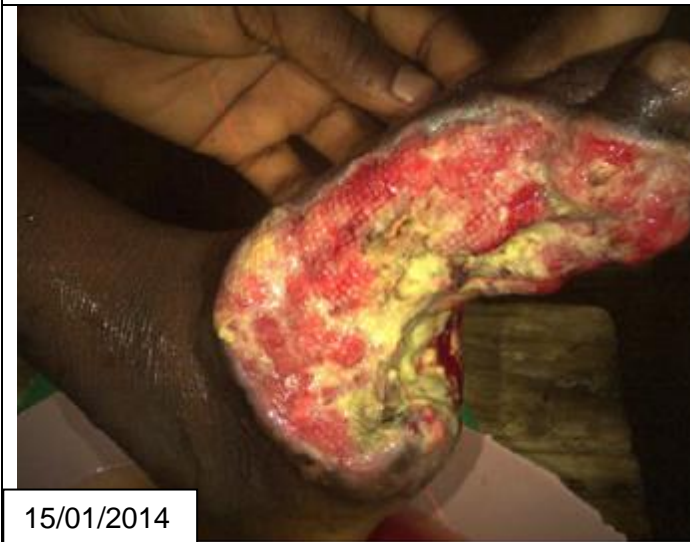

15/01/2014

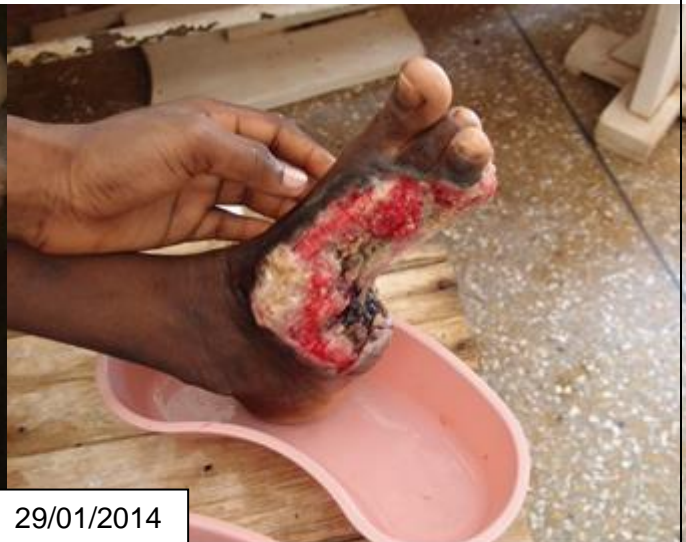

29/01/2014

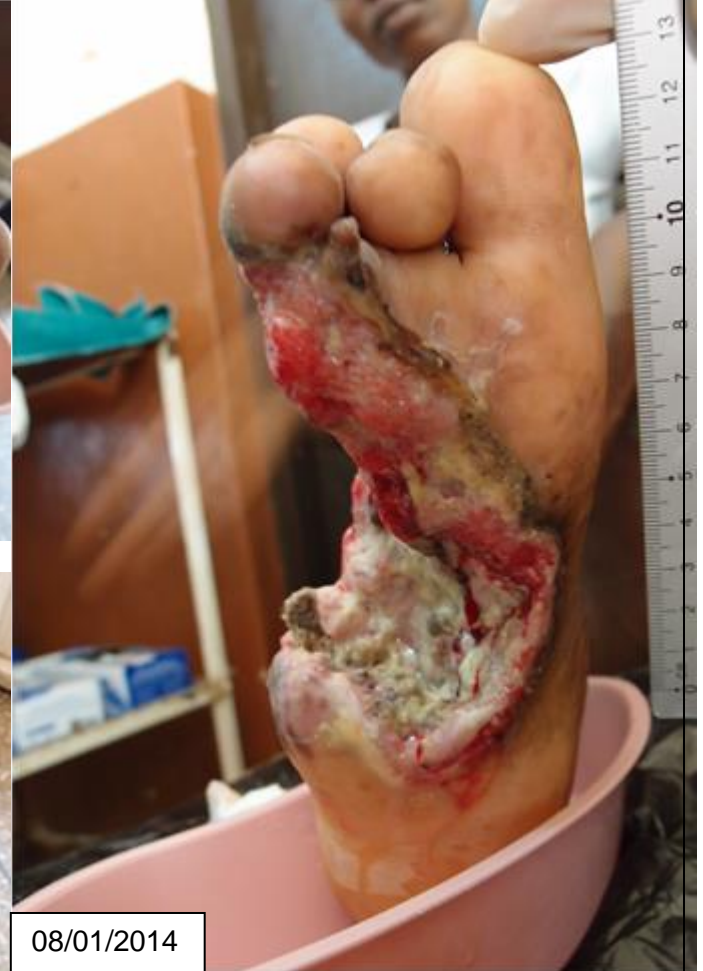

08/01/2014
