# Supplementary material for: Assessing and managing wounds of Buruli ulcer patients at the primary and secondary health care levels in Ghana
Source: PubMed Central journal article supplement (PMC5345880; doi:10.1371/journal.pntd.0005331), 2017-02-28
Supplement: pntd.0005331.s008.pdf [file pntd.0005331.s008.pdf]

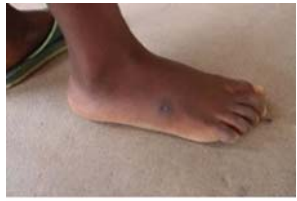

Lesion 1

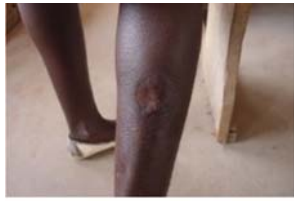

Lesion 2

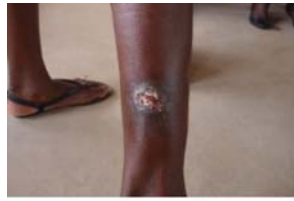

Lesion 3A

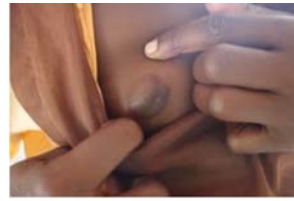

Lesion 3B

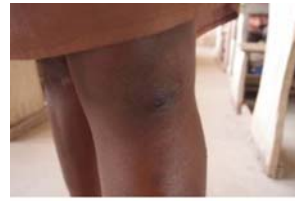

Lesion 4A

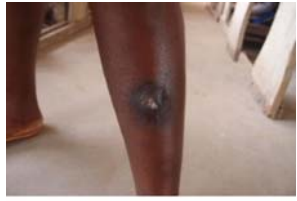

Lesion 4B

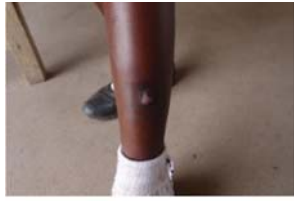

Lesion 5

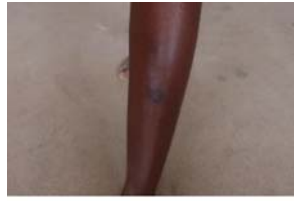

Lesion 6

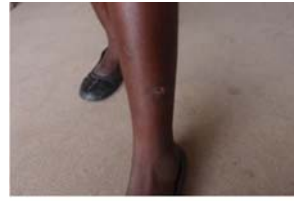

Lesion 7

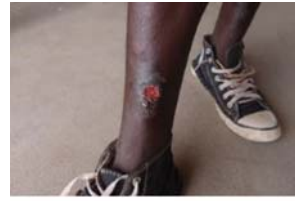

Lesion 8

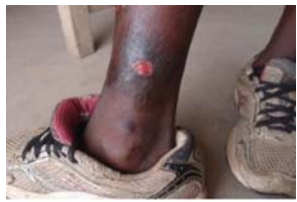

Lesion 9

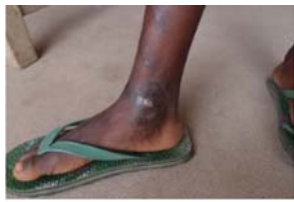

Lesion 10

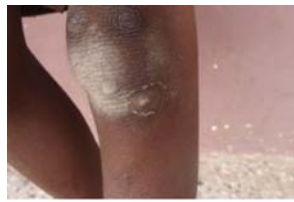

Lesion 11

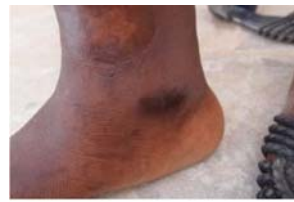

Lesion 12

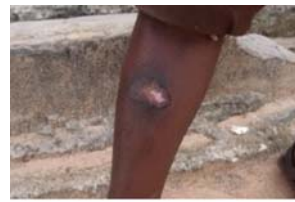

Lesion 13

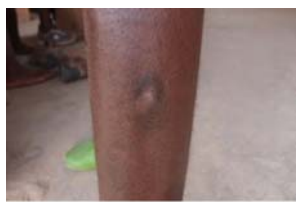

Lesion 14

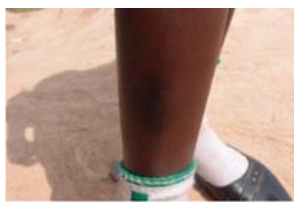

Lesion 15

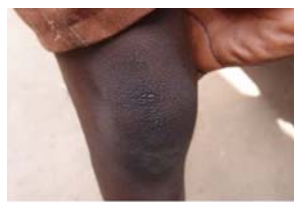

Lesion 16

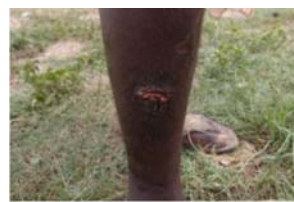

Lesion 17

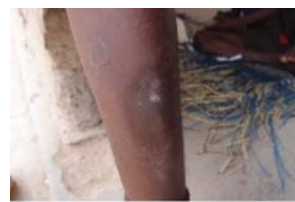

Lesion 18

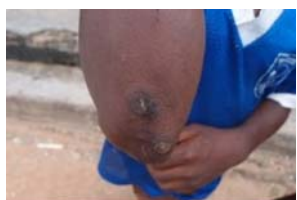

Lesion 19

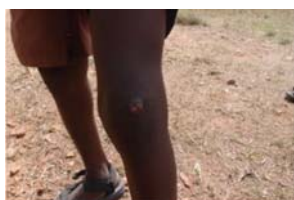

Lesion 20

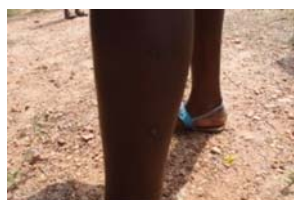

Lesion 21

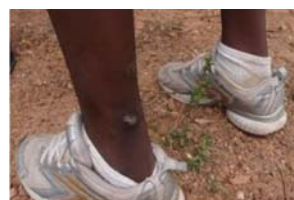

Lesion 22

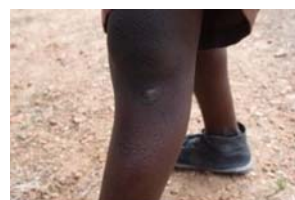

Lesion 23

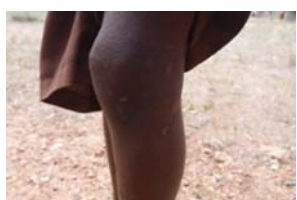

Lesion 24

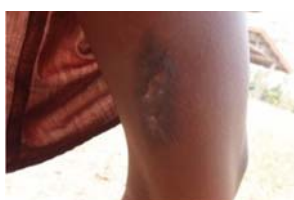

Lesion 25

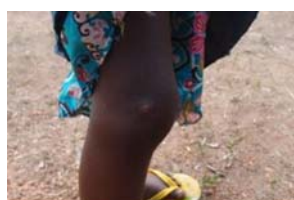

Lesion 26

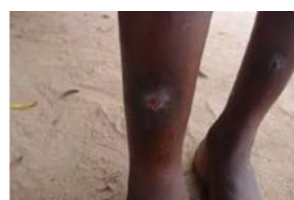

Lesion 27

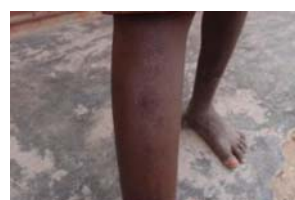

Lesion 28

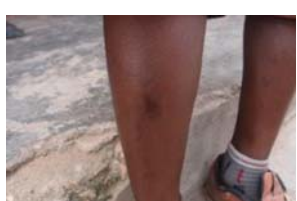

Lesion 29

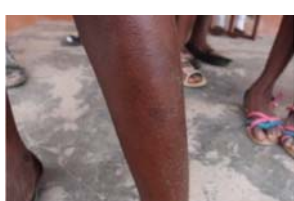

Lesion 30

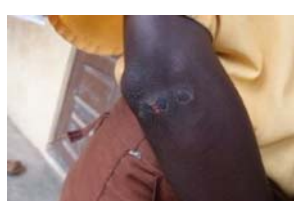

Lesion 31

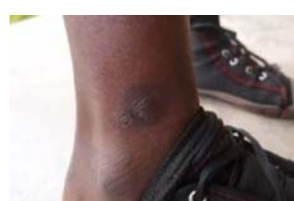

Lesion 32

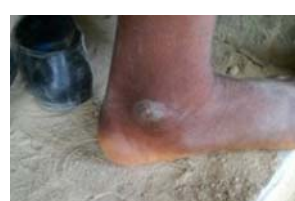

Lesion 33

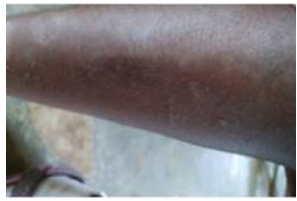

Lesion 34

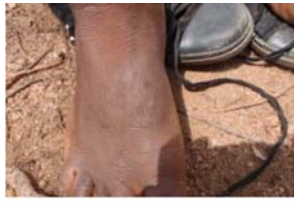

Lesion 35

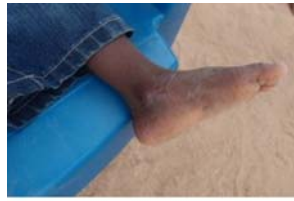

Lesion 36

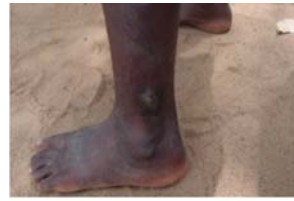

Lesion 37

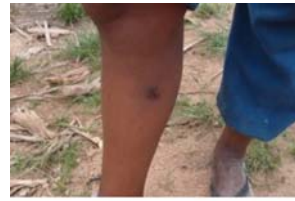

Lesion 38

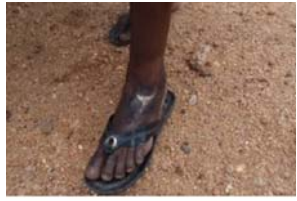

Lesion 39

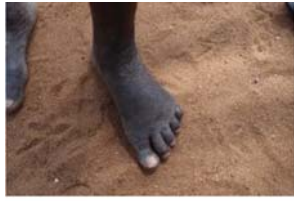

Lesion 40

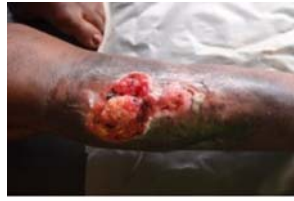

Lesion 41

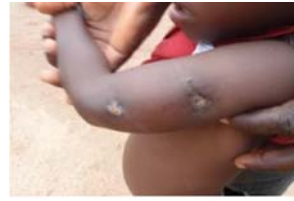

Lesion 42

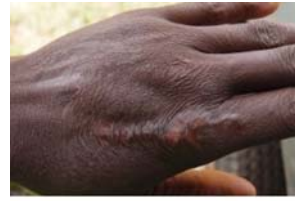

Lesion 43

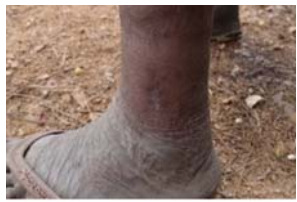

Lesion 44

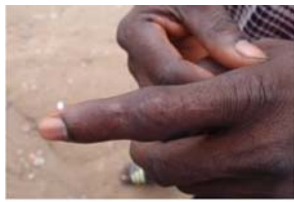

Lesion 45

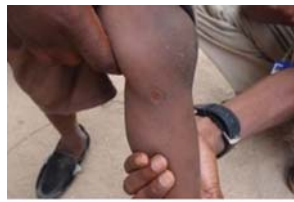

Lesion 46

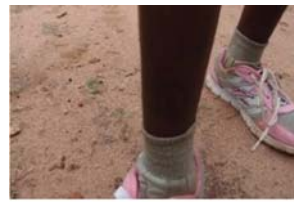

Lesion 47

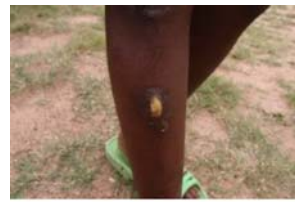

Lesion 48

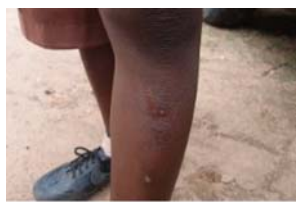

Lesion 49

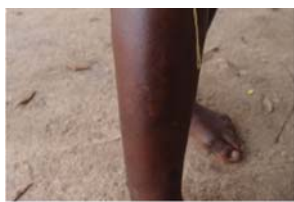

Lesion 50

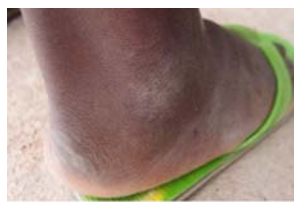

Lesion 51

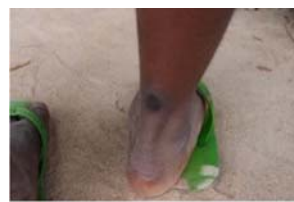

Lesion 52

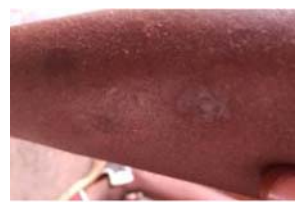

Lesion 53

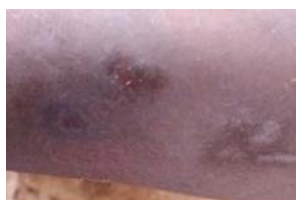

Lesion 54

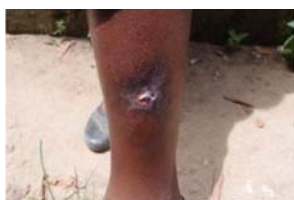

Lesion 55

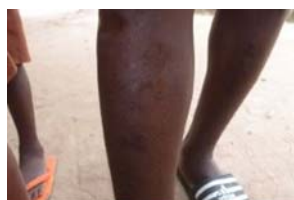

Lesion 56

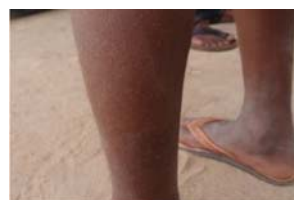

Lesion 57

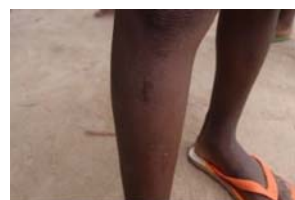

Lesion 58

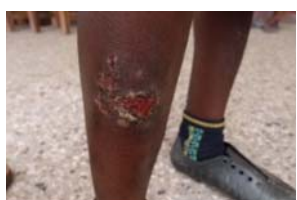

Lesion 59

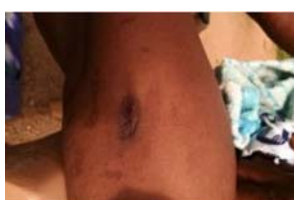

Lesion 60

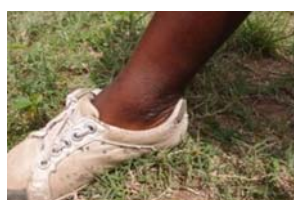

Lesion 61

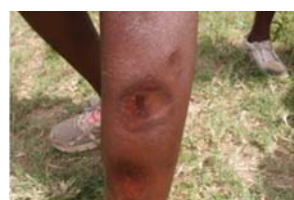

Lesion 62

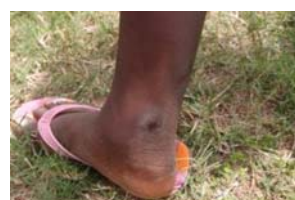

Lesion 63

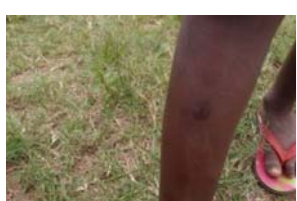

Lesion 64

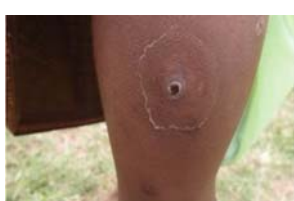

Lesion 65

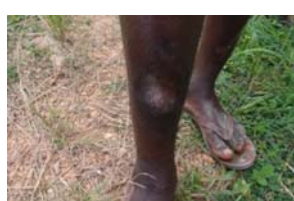

Lesion 66

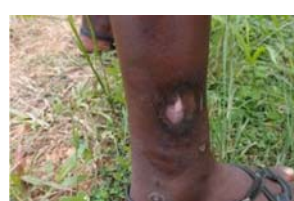

Lesion 67

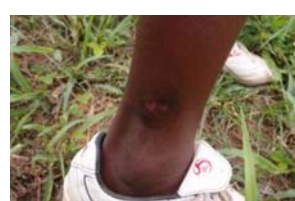

Lesion 68

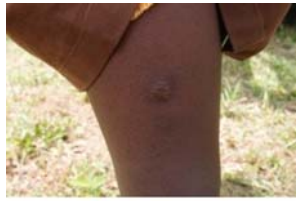

Lesion 69

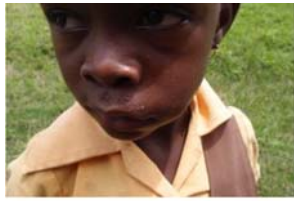

Lesion 70

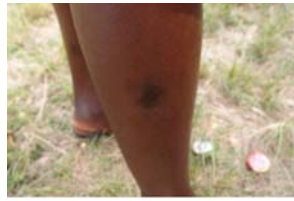

Lesion 71

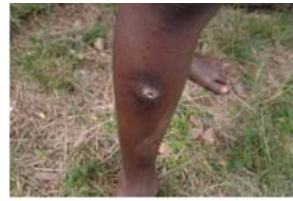

Lesion 72

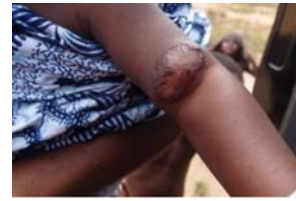

Lesion 73

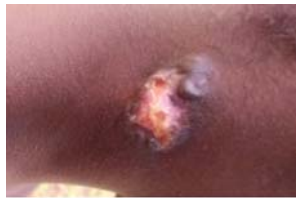

Lesion 74

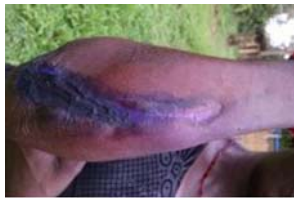

Lesion 75

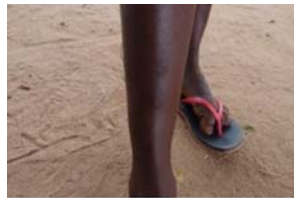

Lesion 76

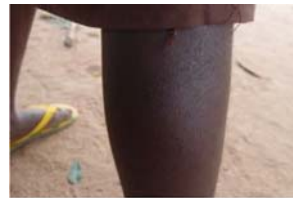

Lesion 77

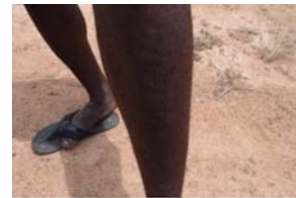

Lesion 78

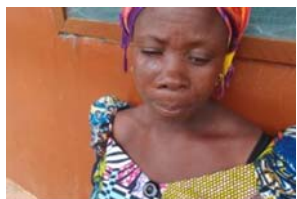

Lesion 79

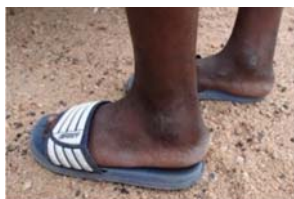

Lesion 80
